# Supplementary material
Source: PubMed Central journal article supplement (PMC3219920)

Supporting Information

© Wiley-VCH 2011

69451 Weinheim, Germany

**Synthesis of (–)-Okilactomycin by a Prins-Type Fragment-Assembly Strategy\*\***

*Jason M. Tenenbaum, William J. Morris, Daniel W. Custar, and Karl A. Scheidt\**

anie\_201102037\_sm\_miscellaneous\_information.pdf

## Supporting Information

|                                                                   |     |
|-------------------------------------------------------------------|-----|
| General Information.....                                          | S2  |
| Synthesis of $\alpha$ -Silyloxy Aldehyde <b>21</b> .....          | S2  |
| Synthesis of $\beta$ -Hydroxy Dioxinone <b>4</b> .....            | S7  |
| Synthesis of $\delta$ -Hydroxy $\beta$ -Ketoester <b>17</b> ..... | S13 |
| Synthesis of Trioxabicyclooctane <b>18</b> .....                  | S14 |
| Synthesis of (–)-Okilactomycin <b>1</b> .....                     | S15 |
| Spectral Comparisons.....                                         | S22 |
| Stereochemical Determination of <b>10</b> .....                   | S23 |
| References.....                                                   | S24 |

### General Information

All reactions were carried out under a nitrogen atmosphere in flame dried glassware with magnetic stirring. Dichloromethane, tetrahydrofuran, benzene, toluene, acetonitrile, ether, and methanol were purified by passage through a bed of activated alumina.<sup>1</sup> Reagents were purified following the guidelines of Armarego and Chai prior to use unless otherwise stated.<sup>2</sup> Purification of reaction products was carried out by flash chromatography using EM Reagent silica gel 60 (230-400 mesh). Preparative HPLC was carried out on an Agilent 1200 Series LC with an Agilent 6130 Quadrupole Mass Analyzer (ESI Source) and a LEAP CTC PAL Fraction Collector. Analytical thin layer chromatography (TLC) was performed on EM Reagent 0.25 mm silica gel 60-F plates. Visualization was accomplished with UV light or ceric ammonium molybdate stain followed by heating. Infrared spectra were recorded on a Bruker Tensor 37 FT-IR spectrometer. <sup>1</sup>H NMR spectra were recorded on an INOVA 500 (500 MHz) or an AVANCE III 500 MHz w/ direct cryoprobe (500 MHz) spectrometer and are reported in ppm using solvent as an internal standard (CDCl<sub>3</sub> at 7.26 ppm). Data are reported as (ap = apparent, s = singlet, d = doublet, t = apparent triplet, q = quartet, m = multiplet, b = broad; coupling constant(s) in Hz; integration.) Proton-decoupled <sup>13</sup>C NMR spectra were recorded on an AVANCE III 500 MHz w/ direct cryoprobe (125 MHz) spectrometer and are reported in ppm using solvent as an internal standard (CDCl<sub>3</sub> at 77.0 ppm). Optical rotations were measured on a Perkin Elmer Model 341 Polarimeter with a sodium lamp. Mass spectra were obtained on a Thermo Finnegan LCQ (ESI) or an Agilent 1100 series LC/MSD. High resolution mass spectra were obtained on a Agilent 6210 LC-TOF (ESI, APCI, APPI).

### Synthesis of $\alpha$ -Silyloxy Aldehyde 21

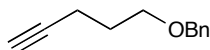

**((pent-4-yn-1-yl)benzene (5)).** To a flame-dried, round-bottom flask with stir bar containing sodium hydride (3.1 g, 129 mmol) and THF (180 mL) was added neat 4-pentyn-1-ol (5.0 mL, 54 mmol) dropwise by syringe. The reaction mixture was stirred at room temperature for 1 h. Benzyl chloride (6.2 mL, 54 mmol) and tetrabutylammonium iodide (0.9 g, 2.4 mmol) were added in one portion, respectively. The flask was fitted with a reflux condenser and heated to 70 °C for 18 h. The reaction mixture was cooled to room temperature and diluted with EtOAc (100 mL). The organic layer was washed with water (2 x 100 mL) and brine (100 mL). The organic layer was dried over Na<sub>2</sub>SO<sub>4</sub> and concentrated. The residue was purified by flash column chromatography (5% EtOAc/hexanes) to afford alkyne **5** (8.1 g, 86%) as a colorless oil. Analytical data: <sup>1</sup>H NMR (500 MHz; CDCl<sub>3</sub>):  $\delta$  7.35-7.34 (m, 4H), 7.30-7.27 (m, 1H), 4.52 (s, 2H), 3.58 (t,  $J$  = 6.2 Hz, 2H), 2.33 (td,  $J$  = 7.1, 2.7 Hz, 2H), 1.94 (t,  $J$  = 2.7 Hz, 1H), 1.84 (tt,  $J$  = 7.1, 6.2 Hz, 2H); <sup>13</sup>C NMR (125 MHz; CDCl<sub>3</sub>):  $\delta$  138.4, 128.3, 127.59, 127.54, 83.9, 73.0, 68.61, 68.43, 28.6, 15.3; HRMS (ESI): Mass calcd for C<sub>12</sub>H<sub>15</sub>O [M+H]<sup>+</sup>, 175.1117. Found [M+H]<sup>+</sup>, 175.1110.

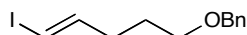

**(E)-((5-iodopent-4-enyloxy)methyl)benzene (6).** To a flame-dried, round-bottom flask with stir bar wrapped in aluminum foil was added  $\text{Cp}_2\text{Zr(H)Cl}$  (3.1 g, 12.1 mmol) and THF (36 mL). The flask was placed in a room temperature water bath and alkyne **5** (2.0 g, 11.5 mmol) was added dropwise by syringe. The flask was removed from the bath and the reaction mixture was stirred for 30 min. The flask was placed in the water bath again and *N*-iodosuccinimide (2.7 g, 12.1 mmol) was added in one portion. The reaction mixture was stirred for 15 min and then diluted with hexanes. The mixture was filtered through Celite and concentrated. The residue was re-dissolved in hexanes and filtered through Florisil and concentrated to afford vinyl iodide **6** (2.9 g, 84%) as a pale yellow oil which was used without further purification. Analytical data:  $^1\text{H}$  NMR (500 MHz;  $\text{CDCl}_3$ ):  $\delta$  7.37-7.28 (m, 5H), 6.51 (dt,  $J = 14.4, 7.2$  Hz, 1H), 5.99 (dt,  $J = 14.3, 1.4$  Hz, 1H), 4.49 (s, 2H), 3.47 (t,  $J = 6.3$  Hz, 2H), 2.17 (ddd,  $J = 14.7, 6.8, 1.4$  Hz, 2H), 1.73-1.68 (m, 2H);  $^{13}\text{C}$  NMR (125 MHz;  $\text{CDCl}_3$ ):  $\delta$  145.9, 138.4, 128.4, 127.64, 127.59, 75.0, 72.9, 69.0, 32.7, 28.4.

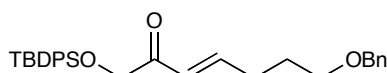

**(E)-7-(benzyloxy)-1-(tert-butyldiphenylsilyloxy)hept-3-en-2-one (S1).** To a flame-dried, round-bottom flask with stir bar containing a  $-78$  °C solution of vinyl iodide **6** (11.0 g, 36.4 mmol) in THF (360 mL) was added *n*-BuLi (25 mL, 40 mmol, 1.61 M in hexanes) dropwise by syringe. In a separate flame-dried, round-bottom flask 2-(tert-butyldiphenylsilyloxy)-*N*-methoxy-*N*-methylacetamide (**7**) (14.5 g, 40.6 mmol) was dissolved in THF (57 mL). The amide solution was added to the vinyl iodide solution dropwise by cannula over 30 min. The reaction mixture was stirred at  $-78$  °C for 3 h. The reaction mixture was quenched with 0.1 N HCl and warmed to room temperature. The mixture was diluted with 1:1  $\text{Et}_2\text{O}$ :hexanes and the aqueous layer was extracted with EtOAc (3x). The combined organic layers were dried over  $\text{Na}_2\text{SO}_4$  and concentrated. The residue was purified by flash column chromatography (5% to 10% EtOAc/hexanes) to afford enone **S1** (11.1 g, 65%) as a colorless oil. Analytical data: IR (film) 3071, 2931, 2856, 1695, 1625, 1427, 1110, 823, 739, 700  $\text{cm}^{-1}$ ;  $^1\text{H}$  NMR (500 MHz;  $\text{CDCl}_3$ ):  $\delta$  7.66 (dt,  $J = 7.4, 1.0$  Hz, 4H), 7.45-7.27 (m, 12H), 6.94 (dt,  $J = 15.7, 6.9$  Hz, 1H), 6.46-6.42 (m, 1H), 4.49 (s, 2H), 4.31 (s, 2H), 3.48 (t,  $J = 6.2$  Hz, 2H), 2.35-2.30 (m, 2H), 1.77 (quintet,  $J = 7.0$  Hz, 2H), 1.10 (s, 9H);  $^{13}\text{C}$  NMR (125 MHz;  $\text{CDCl}_3$ ):  $\delta$  197.9, 147.7, 138.3, 135.5, 134.8, 132.7, 129.9, 129.6, 128.4, 127.80, 127.70, 127.63, 127.61, 125.5, 73.0, 69.2, 69.0, 29.4, 28.1, 26.7, 19.3; LRMS (ESI): Mass calcd for  $\text{C}_{30}\text{H}_{36}\text{NaO}_2\text{Si}$   $[2\text{M}+\text{Na}]^+$ , 967.48. Found  $[2\text{M}+\text{Na}]^+$ , 967.09.

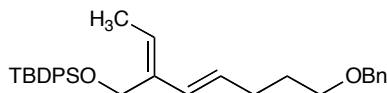

**((2Z,3E)-7-(benzyloxy)-2-ethylidenehept-3-enyloxy)(tert-butyl)diphenylsilane (8).** To a flame-dried, round-bottom flask with stir bar containing a  $-78$  °C solution of ethyltriphenylphosphonium bromide (23.5 g, 63.3 mmol) in THF (165 mL) was added potassium bis(trimethylsilyl)amide (118 mL, 59 mmol, 0.5 M in toluene) dropwise by cannula over 30 min. The reaction mixture was warmed to 0 °C for 40 min, and then re-

cooled to  $-78\text{ }^{\circ}\text{C}$ . To the reaction mixture was added a solution of enone **S1** (11.1 g, 23.5 mmol) in THF (65 mL) dropwise by cannula over 45 min. The reaction mixture was warmed to  $0\text{ }^{\circ}\text{C}$  and stirred for 3 h. The mixture was poured into 0.1 N HCl (250 mL) and 1:1 Et<sub>2</sub>O:hexanes (250 mL). The aqueous layer was extracted with EtOAc (3x), dried with Na<sub>2</sub>SO<sub>4</sub>, and concentrated to afford a white slurry. The slurry was taken up in 1:1 Et<sub>2</sub>O:hexanes and filtered through a plug of SiO<sub>2</sub>, eluting with Et<sub>2</sub>O in order to remove the solid triphenylphosphine oxide. The resulting oil was purified by flash column chromatography (8% Et<sub>2</sub>O/hexanes) to afford diene **8** (9.5 g, 84%) as a colorless oil. Analytical data: IR (film) 3070, 3031, 2930, 2855, 1427, 1109, 1072, 1027, 964, 824 cm<sup>-1</sup>; <sup>1</sup>H NMR (500 MHz; CDCl<sub>3</sub>):  $\delta$  7.71 (dt,  $J = 6.6, 1.4$  Hz, 4H), 7.44-7.35 (m, 10H), 7.31-7.28 (m, 1H), 5.99 (d,  $J = 15.7$  Hz, 1H), 5.81 (dt,  $J = 15.2, 7.4$  Hz, 1H), 5.51 (q,  $J = 7.1$  Hz, 1H), 4.51 (s, 2H), 4.35 (s, 2H), 3.51 (td,  $J = 6.6, 1.2$  Hz, 2H), 2.20 (q,  $J = 7.2$  Hz, 2H), 1.77-1.71 (m, 2H), 1.52 (d,  $J = 7.1$  Hz, 3H), 1.05 (m, 9H); <sup>13</sup>C NMR (125 MHz; CDCl<sub>3</sub>):  $\delta$  138.6, 137.3, 135.7, 133.8, 132.3, 129.5, 128.33, 128.14, 127.62, 127.56, 127.45, 126.8, 72.9, 69.8, 58.6, 29.72, 29.64, 26.8, 19.2, 13.5; LRMS (ESI): Mass calcd for C<sub>32</sub>H<sub>40</sub>NaO<sub>2</sub>Si [M+Na]<sup>+</sup>, 507.27. Found [M+Na]<sup>+</sup>, 507.65.

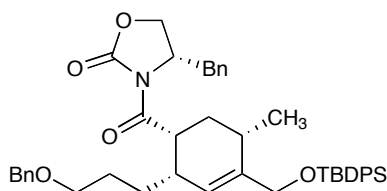

**(S)-4-benzyl-3-((1R,2S,5S)-2-(3-(benzyloxy)propyl)-4-((tert-butyl)diphenylsilyloxy)methyl)-5-methylcyclohex-3-enecarbonyl)oxazolidin-2-one** (**10**).

To a flame-dried scintillation vial with stir bar wrapped in foil was added diene **8** (1.0 g, 2.1 mmol), silver hexafluorophosphate (0.52 g, 2.1 mmol), and CH<sub>2</sub>Cl<sub>2</sub> (4.0 mL), respectively. The reaction mixture was cooled to  $-78\text{ }^{\circ}\text{C}$ . To the solution was added Et<sub>2</sub>AlCl (1.26 mL, 2.3 mmol, 1.8 M in toluene) dropwise by syringe. A  $-78\text{ }^{\circ}\text{C}$  solution of (*S*)-3-acryloyl-4-benzyloxazolidin-2-one (**9**) (0.51 g, 2.2 mmol) in CH<sub>2</sub>Cl<sub>2</sub> (3 mL) was added dropwise by cannula. The reaction mixture was stirred at  $-78\text{ }^{\circ}\text{C}$  for 1 h, and then poured into saturated aqueous NaHCO<sub>3</sub> and diluted with EtOAc. The mixture was filtered through Celite and concentrated. The residue was diluted with CH<sub>2</sub>Cl<sub>2</sub>, filtered through a Biotage ISOLUTE® phase separator, and the organic filtrate was concentrated. The resulting residue was purified by flash column chromatography (15% EtOAc/hexanes) to afford cyclohexene **10** (1.27 g, 86%) in a >20:1 ratio of diastereomers as a white solid. Analytical data: IR (film) 2931, 2857, 1781, 1697, 1385, 1212, 1110, 823, 701 cm<sup>-1</sup>; <sup>1</sup>H NMR (500 MHz; CDCl<sub>3</sub>):  $\delta$  7.70-7.67 (m, 4H), 7.42-7.37 (m, 6H), 7.31 (q,  $J = 8.6$  Hz, 3H), 7.24-7.16 (m, 7H), 5.83 (d,  $J = 5.6$  Hz, 1H), 4.70 (ddt,  $J = 10.8, 7.5, 3.5$  Hz, 1H), 4.43 (s, 2H), 4.20-4.14 (m, 2H), 4.11-4.07 (m, 2H), 3.84 (ddd,  $J = 12.8, 5.4, 2.5$  Hz, 1H), 3.46 (dt,  $J = 9.2, 6.3$  Hz, 1H), 3.43-3.37 (m, 2H), 2.85-2.82 (m, 1H), 2.50 (dd,  $J = 13.0, 10.6$  Hz, 1H), 2.34-2.29 (m, 1H), 1.81 (ddd,  $J = 13.3, 5.7, 2.2$  Hz, 1H), 1.78-1.72 (m, 1H), 1.72-1.65 (m, 1H), 1.61-1.56 (m, 1H), 1.39-1.34 (m, 2H), 1.05 (s, 9H), 1.00 (d,  $J = 6.9$  Hz, 3H); <sup>13</sup>C NMR (125 MHz; CDCl<sub>3</sub>):  $\delta$  175.3, 153.1, 140.4, 138.5, 135.59, 135.55, 133.80, 133.67, 129.6, 129.4, 129.0, 128.3, 127.68, 127.66, 127.62, 127.44, 127.28, 123.9, 73.0, 70.3, 66.3, 65.7, 55.3, 43.1, 38.3, 34.7, 30.9, 29.8, 28.7, 27.4,

26.9, 19.3, 19.1; LRMS (ESI): Mass calcd for C<sub>45</sub>H<sub>57</sub>N<sub>2</sub>O<sub>5</sub>Si [M+NH<sub>4</sub>]<sup>+</sup>, 733.40. Found [M+NH<sub>4</sub>]<sup>+</sup>, 733.25; [α]<sub>D</sub><sup>20</sup> +81.9 (CHCl<sub>3</sub>, *c* 0.87).

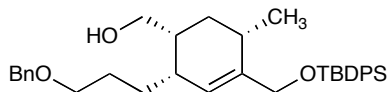

**((1R,2S,5S)-2-(3-(benzyloxy)propyl)-4-((tert-butyl-diphenylsilyloxy)methyl)-5-methylcyclohex-3-enyl)methanol (S2).** To a flame-dried, round-bottom flask with stir bar containing a 0 °C solution of cyclohexene **10** (2.7 g, 3.8 mmol), Et<sub>2</sub>O (13 mL), and MeOH (0.25 mL) was added LiBH<sub>4</sub> (96 mg, 4.4 mmol) in one portion. The reaction mixture was stirred at 0 °C for 3.5 h and then carefully quenched with saturated aqueous NaHCO<sub>3</sub>. The aqueous layer was extracted with EtOAc (3x). The combined organic layers were dried over Na<sub>2</sub>SO<sub>4</sub> and concentrated. The residue was purified by flash column chromatography (15% to 20% EtOAc/hexanes) to afford primary alcohol **S2** (1.7 g, 83%) as a colorless oil. Analytical data: IR (film) 3401, 2929, 2857, 1428, 1362, 1111, 739, 701 cm<sup>-1</sup>; <sup>1</sup>H-NMR (500 MHz; CDCl<sub>3</sub>): δ 7.69-7.66 (m, 4H), 7.42-7.33 (m, 10H), 7.29-7.27 (m, 1H), 5.82-5.81 (m, 1H), 4.49 (s, 2H), 4.21 (dd, *J* = 13.0, 1.1 Hz, 1H), 4.08 (d, *J* = 13.0 Hz, 1H), 3.62 (ddd, *J* = 10.6, 7.9, 5.2 Hz, 1H), 3.53 (ddd, *J* = 10.6, 6.9, 5.9 Hz, 1H), 3.47 (td, *J* = 6.5, 1.2 Hz, 2H), 2.35-2.30 (m, 1H), 2.25 (dt, *J* = 10.3, 5.2 Hz, 1H), 1.91 (ttd, *J* = 10.3, 5.3, 2.5 Hz, 1H), 1.78-1.71 (m, 1H), 1.64 (ddd, *J* = 12.9, 6.0, 1.9 Hz, 1H), 1.57 (ddd, *J* = 13.3, 10.2, 6.0 Hz, 1H), 1.53-1.45 (m, 1H), 1.39-1.37 (m, 1H), 1.18-1.13 (m, 1H), 1.05 (s, 9H), 0.95 (d, *J* = 7.0 Hz, 3H); <sup>13</sup>C NMR (125 MHz; CDCl<sub>3</sub>): δ 140.5, 138.5, 135.53, 135.50, 133.90, 133.79, 129.53, 129.52, 128.3, 127.66, 127.58, 127.52, 127.51, 125.6, 72.8, 70.5, 66.0, 65.2, 40.1, 34.7, 31.6, 30.9, 27.4, 26.81, 26.67, 19.34, 19.28; LRMS (ESI): Mass calcd for C<sub>35</sub>H<sub>50</sub>NO<sub>3</sub>Si [M+NH<sub>4</sub>]<sup>+</sup>, 560.36. Found [M+NH<sub>4</sub>]<sup>+</sup>, 560.58; [α]<sub>D</sub><sup>20</sup> +60.7 (MeOH, *c* 0.83).

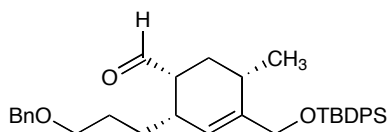

**((1R,2S,5S)-2-(3-(benzyloxy)propyl)-4-((tert-butyl-diphenylsilyloxy)methyl)-5-methylcyclohex-3-enecarbaldehyde (11).** To a flame-dried, round-bottom flask with stir bar containing alcohol **S2** (1.9 g, 3.5 mmol) and CH<sub>2</sub>Cl<sub>2</sub> (100 mL) was added Dess-Martin periodinane (3.1 g, 7.3 mmol) and a few drops of water. The mixture was stirred at room temperature for 45 min and quenched with saturated aqueous NaHCO<sub>3</sub> (60 mL) and ½ saturated aqueous Na<sub>2</sub>S<sub>2</sub>O<sub>3</sub> (60 mL). The mixture was stirred until both layers were clear, filtered through a Biotage ISOLUTE® phase separator, and the organic filtrate was concentrated. The residue was purified by flash column chromatography (5% EtOAc/hexanes) to afford aldehyde **11** (1.7 g, 90%) as a colorless oil. Analytical data: IR (film) 2931, 2857, 2710, 1723, 1428, 1361, 1111, 823, 739, 701 cm<sup>-1</sup>; <sup>1</sup>H NMR (500 MHz; CDCl<sub>3</sub>): δ 9.77 (s, 1H), 7.66 (tt, *J* = 6.1, 1.7 Hz, 4H), 7.43-7.27 (m, 11H), 5.84 (dd, *J* = 5.3, 1.4 Hz, 1H), 4.47 (s, 2H), 4.19 (dd, *J* = 13.2, 0.9 Hz, 1H), 4.09 (d, *J* = 13.2 Hz, 1H), 3.42 (t, *J* = 6.5 Hz, 2H), 2.63 (dq, *J* = 10.0, 4.9 Hz, 1H), 2.57 (ddd, *J* = 12.1, 5.0, 2.8 Hz, 1H), 2.30 (dq, *J* = 15.6, 7.6 Hz, 1H), 2.00 (ddd, *J* = 13.5, 6.1, 2.5 Hz, 1H), 1.75-

1.67 (m, 1H), 1.63-1.56 (m, 1H), 1.43-1.35 (m, 2H), 1.28 (dtd,  $J = 12.9, 10.4, 5.0$  Hz, 1H), 1.06 (s, 9H), 0.98 (d,  $J = 7.0$  Hz, 3H);  $^{13}\text{C}$  NMR (125 MHz;  $\text{CDCl}_3$ ):  $\delta$  204.9, 141.2, 138.4, 135.51, 135.49, 133.67, 133.63, 129.62, 129.60, 128.3, 127.64, 127.62, 127.57, 127.52, 124.0, 72.9, 70.2, 65.7, 50.9, 34.4, 30.7, 29.1, 27.7, 27.4, 26.8, 19.3; LRMS (ESI): Mass calcd for  $\text{C}_{35}\text{H}_{48}\text{NO}_3\text{Si}$   $[\text{M}+\text{NH}_4]^+$ , 558.34. Found  $[\text{M}+\text{NH}_4]^+$ , 558.75;  $[\alpha]_{\text{D}}^{20} = +61.8^\circ$  (MeOH,  $c$  1.57).

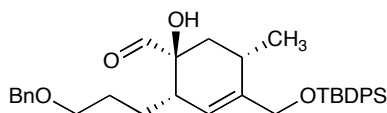

**(1S,2S,5S)-2-(3-(benzyloxy)propyl)-4-((tert-butylidiphenylsilyloxy)methyl)-1-hydroxy-5-methylcyclohex-3-enecarbaldehyde (3).** To a flame-dried, round-bottom flask with stir bar containing aldehyde **11** (1.6 g, 3.0 mmol) and  $\text{CH}_2\text{Cl}_2$  (7 mL) was added triethylamine (6.0 mL), followed by *t*-butyldimethylsilyltriflate (7.2 mL 31 mmol) dropwise by syringe. The solution was stirred for 1 h at room temperature, then cooled to 0 °C and diluted with hexanes followed by saturated aqueous  $\text{Na}_2\text{S}_2\text{O}_3$ . The aqueous layer was extracted with hexanes (3x) and the combined organic layers were dried over  $\text{Na}_2\text{SO}_4$  and concentrated. The resulting yellow oil was added to a round-bottom flask, dissolved in  $\text{CH}_2\text{Cl}_2$  (64 mL), and cooled to 0 °C. To the solution was added a cold solution of dimethyldioxirane (53.8 mL 3.8 mmol, 0.07 M in acetone) dropwise by syringe. The reaction mixture was concentrated in vacuo after 5 min (bath  $>25^\circ\text{C}$ ). The residue was redissolved in EtOAc (100 mL) and re-cooled to 0 °C. To the solution was added 0.1 N HCl (50 mL). The mixture was stirred at 0 °C for 30 min and then at room temperature for 30 min. The reaction mixture was extracted with EtOAc (3x), and the combined organic layers were dried over  $\text{Na}_2\text{SO}_4$  and concentrated. The residue was purified by flash column chromatography (10% to 20% EtOAc/hexanes) to afford  $\alpha$ -hydroxy aldehyde **3** (1.45 g, 88% over two steps) in a 13:1 ratio of diastereomers as a colorless oil. Analytical data: IR (film) 3431, 2955, 2857, 1724, 1454, 1111, 438  $\text{cm}^{-1}$ ;  $^1\text{H}$  NMR (500 MHz;  $\text{CDCl}_3$ ):  $\delta$  9.64 (s, 1H), 7.67 (ddd,  $J = 7.9, 4.0, 1.5$  Hz, 4H), 7.43-7.27 (m, 11H), 5.71 (dd,  $J = 3.2, 1.5$  Hz, 1H), 4.47 (s, 2H), 4.20 (q,  $J = 13.9$  Hz, 2H), 3.47-3.39 (m, 2H), 3.21 (s, 1H), 2.55 (q,  $J = 6.7$  Hz, 1H), 2.26 (d,  $J = 9.4$  Hz, 1H), 1.93 (dd,  $J = 13.6, 6.8$  Hz, 1H), 1.81-1.73 (m, 1H), 1.62-1.52 (m, 3H), 1.19-1.12 (m, 1H), 1.07 (s, 9H), 0.97 (d,  $J = 7.2$  Hz, 3H);  $^{13}\text{C}$  NMR (126 MHz;  $\text{CDCl}_3$ ):  $\delta$  204.7, 140.3, 138.4, 135.56, 135.54, 133.5, 129.71, 129.69, 128.4, 127.67, 127.63, 127.54, 121.3, 78.6, 72.9, 69.9, 65.4, 43.6, 38.4, 28.2, 27.67, 27.63, 26.8, 19.7, 19.2; LRMS (ESI): Mass calcd for  $\text{C}_{35}\text{H}_{48}\text{NO}_4\text{Si}$   $[\text{M}+\text{NH}_4]^+$ , 574.34. Found  $[\text{M}+\text{NH}_4]^+$ , 574.50;  $[\alpha]_{\text{D}}^{20} +60.9$  (MeOH,  $c$  0.77).

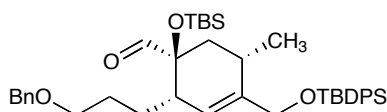

**(1S,2S,5S)-2-(3-(benzyloxy)propyl)-1-(tert-butylidimethylsilyloxy)-4-((tert-butylidiphenylsilyloxy)methyl)-5-methylcyclohex-3-enecarbaldehyde (21).** To a flame-dried, round-bottom flask with stir bar containing  $\alpha$ -hydroxy aldehyde **3** (3.7 g 6.6

mmol), 2,6-lutidine (4.6 mL, 40 mmol) and  $\text{CH}_2\text{Cl}_2$  (67 mL) was added *t*-butyldimethylsilyltriflate (4.6 mL, 20 mmol) dropwise by syringe. The reaction mixture was stirred for 40 min, quenched with saturated aqueous  $\text{NaHCO}_3$  (70 mL), and filtered through a Biotage ISOLUTE® phase separator. The organic filtrate was concentrated and the residue was purified by flash column chromatography (2% to 4% EtOAc/hexanes) to afford  $\alpha$ -silyloxy aldehyde **21** (3.9 g, 88%) as a pale yellow oil. Analytical data: IR (film) 2954, 2930, 2857, 2737, 2709, 1734, 1472, 1253, 1112, 837, 777, 739, 702  $\text{cm}^{-1}$ ;  $^1\text{H}$  NMR (500 MHz;  $\text{CDCl}_3$ ):  $\delta$  9.60 (s, 1H), 7.69-7.66 (m, 4H), 7.42-7.27 (m, 11H), 5.73 (dt,  $J = 3.0, 1.5$  Hz, 1H), 4.46 (s, 2H), 4.17 (dd,  $J = 12.9, 1.0$  Hz, 1H), 4.09 (d,  $J = 12.9$  Hz, 1H), 3.41 (td,  $J = 6.4, 1.2$  Hz, 2H), 2.53 (d,  $J = 7.6$  Hz, 1H), 2.30-2.28 (m, 1H), 1.79 (ddd,  $J = 13.8, 6.3, 1.2$  Hz, 1H), 1.75-1.70 (m, 1H), 1.58 (dd,  $J = 13.8, 9.3$  Hz, 1H), 1.53-1.45 (m, 2H), 1.12-1.08 (m, 1H), 1.05 (s, 9H), 0.99 (d,  $J = 7.1$  Hz, 3H), 0.87 (s, 9H), 0.11 (s, 3H), 0.09 (s, 3H);  $^{13}\text{C}$  NMR (125 MHz;  $\text{CDCl}_3$ ):  $\delta$  202.9, 139.8, 138.4, 135.54, 135.52, 133.61, 133.59, 129.62, 129.55, 128.3, 127.63, 127.59, 127.52, 121.7, 81.1, 72.9, 70.1, 65.7, 43.1, 35.7, 31.6, 29.1, 27.63, 27.56, 26.8, 25.8, 19.2, 19.0, 18.4, 14.1, -2.2, -2.5; LRMS (ESI): Mass calcd for  $\text{C}_{41}\text{H}_{58}\text{O}_4\text{Si}_2\text{Na}$   $[\text{M}+\text{Na}]^+$ , 693.38. Found  $[\text{M}+\text{Na}]^+$ , 693.53;  $[\alpha]_{\text{D}}^{20} +62.1$  ( $\text{CHCl}_3$ ,  $c$  1.02).

#### Synthesis of $\beta$ -Hydroxy Dioxinone 4

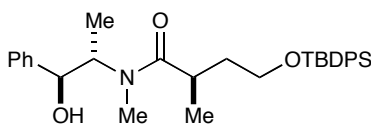

**(R)-4-(tert-butyldiphenylsilyloxy)-N-((1S,2S)-1-hydroxy-1-phenylpropan-2-yl)-N,2-dimethylbutanamide (S3).** To a  $-78$  °C suspension of LiCl (21.8 g, 514 mmol) and diisopropylamine (25.7 mL, 183 mmol) in THF (123 mL) was added *n*-BuLi (82 mL, 172 mmol, 2.1 M solution in hexanes) via cannula. The resulting suspension was warmed to 0 °C briefly and then was cooled to  $-78$  °C. An ice-cooled solution of (1S,2S)-pseudoephedrine propionamide (20.2 g, 91.5 mmol) in THF (300 mL) was added via cannula. The mixture was stirred at  $-78$  °C for 1 h, at 0 °C for 15 min, and at 23 °C for 5 min. The mixture was cooled to 0 °C and a solution of TBDPS iodoethanol (23.5 g, 57.2 mmol) in THF (27 mL) was added via cannula. The mixture stirred for 18 hours in a water bath before being quenched by the addition of saturated  $\text{NH}_4\text{Cl}$  (300 mL). The organic layer was removed and the remaining aqueous layer was extracted with EtOAc (4 x 100 mL). The combined organic layers were combined and dried over  $\text{Na}_2\text{SO}_4$ , filtered and concentrated *in vacuo*. The residue was purified by flash column chromatography ( $\text{SiO}_2$ , 75% Et<sub>2</sub>O/hexanes) to afford amide **S3** (30.4 g, 98%) as a viscous oil (dr 20:1). Analytical data: IR (film) 3379, 3062, 1959, 1890, 1824, 1770, 1618, 1107  $\text{cm}^{-1}$ ;  $^1\text{H}$  NMR (3:1 rotamer ratio, only major rotamer reported, 500 MHz,  $\text{C}_6\text{D}_6$ )  $\delta$  7.69-7.65 (m, 5H), 7.4-7.0 (m, 10H), 4.56-4.53 (m, 1H), 3.58-3.52 (m, 2H), 2.80-2.76 (m, 1H), 2.49 (s, 3H), 1.94-1.90 (m, 1H), 1.49-1.45 (m, 1H), 1.21-1.19 (m, 1H), 1.09 (s, 9H), 0.97-0.96 (d,  $J = 5.5$  Hz, 3H), 0.96-0.95 (d,  $J = 6.7$  Hz, 3H);  $^{13}\text{C}$  NMR (125 MHz,  $\text{C}_6\text{D}_6$ )  $\delta$  177.6, 143.6, 135.9, 135.8, 135.7, 134.1, 129.9, 129.8, 128.2, 126.7, 76.1, 61.8, 37.0, 32.6, 27.1, 27.0, 19.3, 17.1, 14.2; LRMS (ESI): Mass calcd for  $\text{C}_{31}\text{H}_{42}\text{NO}_3\text{Si}$   $[\text{M}+\text{H}]^+$ , 504.75. Found 504.70;  $[\alpha]_{\text{D}}^{20} +36.4$  ( $\text{CH}_2\text{Cl}_2$ ,  $c$  1.0).



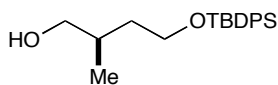

**(R)-4-(tert-butylidiphenylsilyloxy)-2-methylbutan-1-ol (S4).** To a  $-78$  °C solution of diisopropylamine (33.1 mL, 234 mmol) in THF (233 mL) was added *n*-BuLi (103 mL, 217 mmol, 2.1 M solution in hexanes) via cannula. The resulting solution was stirred at  $-78$  °C for 10 min, then warmed to 0 °C and held at that temperature for 10 min. Borane-ammonia complex (90%, 6.9 g, 223 mmol) was added in one portion, and the suspension was stirred at 0 °C for 15 min and then warmed to 23 °C. After 15 min, the suspension was cooled to 0 °C and a solution of **S3** (30.4 g, 55.7 mmol) in THF (140 mL) was added via cannula. The reaction mixture was warmed to 23 °C, held at this temperature for 2 h, and then cooled to 0 °C where excess hydride was quenched by the addition of 0.01 M aqueous HCl (500 mL). The mixture was stirred for 30 min at 0 °C and then extracted with EtOAc (4 x 150 mL). The combined organic extracts were washed with 0.1 M aqueous HCl (60 mL), 1 M NaOH (2 x 60 mL), and brine (50 mL). The organic layer was dried over Na<sub>2</sub>SO<sub>4</sub>, filtered and concentrated. The residue was purified by flash column chromatography (SiO<sub>2</sub>, 60% Et<sub>2</sub>O/hexanes) to afford **S4** (18.3 g, 96%) as a viscous oil. Analytical data: IR (film) 3351, 2931, 1959, 1890, 1824, 1773, 1465, 1427 cm<sup>-1</sup>; <sup>1</sup>H NMR, (500 MHz, CDCl<sub>3</sub>) δ 7.69–7.68 (m, 4H), 7.46–7.39 (m, 6H), 3.78–3.74 (m, 1H), 3.73–3.70 (m, 1H), 3.54–3.48 (m, 2H), 2.60 (br s, 1H), 1.88–1.85 (m, 1H), 1.64–1.62 (m, 1H), 1.57–1.49 (m, 1H), 1.06 (s, 9H), 0.92–0.91 (d, *J* = 7.02 Hz, 3H); <sup>13</sup>C NMR (125 MHz, CDCl<sub>3</sub>) δ 135.8, 133.6, 129.9, 127.6, 68.4, 62.7, 37.0, 34.1, 27.0, 19.3, 17.4; LRMS (ESI): Mass calcd for C<sub>21</sub>H<sub>30</sub>O<sub>2</sub>SiNa [M+Na]<sup>+</sup>, 365.5. Found 365.2; [α]<sub>D</sub><sup>20</sup> +6.3 (CH<sub>2</sub>Cl<sub>2</sub>, *c* 1.05).

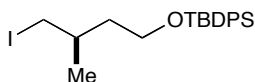

**(R)-tert-butyl(4-iodo-3-methylbutoxy)diphenylsilane (S5).** To a solution of Ph<sub>3</sub>P (16.8 g, 64.1 mmol) in CH<sub>2</sub>Cl<sub>2</sub> (200 mL) was added imidazole (5.45 g, 80 mmol) and iodine (18.4 g, 72.1 mmol) at 23 °C. A solution of **S4** in CH<sub>2</sub>Cl<sub>2</sub> (24 mL) was added to this suspension via cannula. After 2 h, CH<sub>2</sub>Cl<sub>2</sub> was removed *in vacuo*. The solid residue was purified by flash column chromatography (SiO<sub>2</sub>, 10% EtOAc/hexanes) to afford **S5** (20.2 g, 84%) as a colorless oil. Analytical data: IR (film) 3066, 2930, 1959, 1889, 1824, 1771, 1550 cm<sup>-1</sup>; <sup>1</sup>H NMR, (500 MHz, CDCl<sub>3</sub>) δ 7.68–7.66 (m, 4H), 7.44–7.38 (m, 6H), 3.71–3.69 (t, *J* = 6.23 Hz, 2H), 3.27–3.24 (dd, *J* = 9.7, 4.5 Hz, 1H), 3.18–3.15 (dd, *J* = 9.7, 4.5 Hz, 1H), 1.76–1.71 (m, 1H), 1.70–1.63 (m, 1H), 1.48–1.43 (m, 1H), 1.07 (s, 9H), 0.98–0.96 (d, *J* = 6.58 Hz, 3H); <sup>13</sup>C NMR (125 MHz, CDCl<sub>3</sub>) δ 135.8, 134.0, 129.9, 127.9, 61.8, 39.2, 31.6, 27.2, 20.9, 19.5, 18.4; LRMS (ESI): Mass calculated for C<sub>21</sub>H<sub>29</sub>OSi [M-I]<sup>+</sup>, 325.5. Found 325.2; [α]<sub>D</sub><sup>20</sup> +1.2 (CH<sub>2</sub>Cl<sub>2</sub> *c* 1.2).

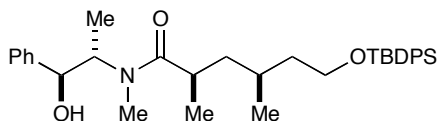

**(2R,4S)-6-(tert-butyldiphenylsilyloxy)-N-((1S,2S)-1-hydroxy-1-phenylpropan-2-yl)-N,2,4-trimethylhexanamide (S6).** To a  $-78\text{ }^{\circ}\text{C}$  suspension of LiCl (22.7 g, 535 mmol) and diisopropylamine (26.8 mL, 192 mmol) in THF (77 mL) was added *n*-BuLi (87 mL, 178 mmol, 2.05 M solution in hexanes) via cannula. The resulting suspension was warmed to  $0\text{ }^{\circ}\text{C}$  briefly and then was cooled to  $-78\text{ }^{\circ}\text{C}$ . An ice-cooled solution of (1S,2S)-pseudoephedrine propionamide (20.8 g, 93.8 mmol) in THF (144 mL) was added via cannula. The mixture was stirred at  $-78\text{ }^{\circ}\text{C}$  for 1 h, at  $0\text{ }^{\circ}\text{C}$  for 15 min, and at  $23\text{ }^{\circ}\text{C}$  for 5 min. The mixture was cooled to  $0\text{ }^{\circ}\text{C}$  and a solution of **S5** (20.2 g, 44.6 mmol) in THF (10 mL) was added via cannula. The mixture stirred for 18 hours at  $23\text{ }^{\circ}\text{C}$  before being quenched by the addition of saturated/ $\frac{1}{2}$  saturated  $\text{NH}_4\text{Cl}$  (300 mL). The organic layer was removed and the remaining aqueous layer was extracted with EtOAc (4 x 100 mL). The combined organic layers were combined and dried over  $\text{Na}_2\text{SO}_4$ , filtered and concentrated *in vacuo*. The residue was purified by flash column chromatography ( $\text{SiO}_2$ , 50% EtOAc/hexanes) to afford amide **S6** (22.5 g, 93%) as a viscous oil (dr 20:1). Analytical data: IR (film) 3374, 2931, 1617, 1612, 1107  $\text{cm}^{-1}$ ;  $^1\text{H}$  NMR (3:1 rotamer ratio, only major rotamer reported, 500 MHz,  $\text{C}_6\text{D}_6$ )  $\delta$  7.79-7.77 (m, 5H), 7.26-7.00 (m, 10H), 4.5-4.40 (m, 1H), 3.78-3.70 (m, 2H), 2.40-2.35 (m, 1H), 2.25 (s, 3H), 1.82-1.80 (m, 1H), 1.61-1.59 (m, 1H), 1.25-1.20 (m, 1H), 1.15 (s, 9H), 1.05-1.02 (m, 1H), 0.96-0.94 (d,  $J = 8.4\text{ Hz}$ , 3H), 0.94-0.93 (d,  $J = 6.7\text{ Hz}$ , 3H), 0.90 (m, 1H), 0.85 (m, 1H), 0.65-0.64 (d,  $J = 6.2\text{ Hz}$ , 3H);  $^{13}\text{C}$  NMR (125 MHz,  $\text{C}_6\text{D}_6$ )  $\delta$  178.2, 143.7, 135.9, 135.8, 134.3, 129.8, 128.5, 127.2, 126.5, 76.3, 62.2, 41.7, 40.1, 34.1, 27.5, 27.0, 26.3, 23.6, 19.8, 19.3, 17.9, 14.2; LRMS (ESI): Mass calcd for  $\text{C}_{34}\text{H}_{48}\text{NO}_3\text{Si}$   $[\text{M}+\text{H}]^+$ , 546.8. Found 546.6;  $[\alpha]_{\text{D}}^{20} +45.7$  ( $c$  0.9,  $\text{CH}_2\text{Cl}_2$ ).

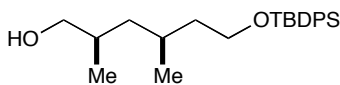

**(2R,4S)-6-(tert-butyldiphenylsilyloxy)-2,4-dimethylhexan-1-ol (S7).** To a  $-78\text{ }^{\circ}\text{C}$  solution of diisopropylamine (24.5 mL, 173 mmol) in THF (170 mL) was added *n*-BuLi (80 mL, 160 mmol, 2.0 M solution in hexanes) via cannula. The resulting solution was stirred at  $-78\text{ }^{\circ}\text{C}$  for 10 min, then warmed to  $0\text{ }^{\circ}\text{C}$  and held at that temperature for 10 min. Borane-ammonia complex (90%, 5.1 g, 165 mmol) was added in one portion, and the suspension was stirred at  $0\text{ }^{\circ}\text{C}$  for 15 min and then warmed to  $23\text{ }^{\circ}\text{C}$ . After 15 min, the suspension was cooled to  $0\text{ }^{\circ}\text{C}$  and a solution of amide **S6** (22.5 g, 41.2 mmol) in THF (103 mL) was added via cannula. The reaction mixture was warmed to  $23\text{ }^{\circ}\text{C}$ , held at this temperature for 2 h, and then cooled to  $0\text{ }^{\circ}\text{C}$  where excess hydride was quenched by the addition of 0.01 M aqueous HCl (500 mL). The mixture was stirred for 30 min at  $0\text{ }^{\circ}\text{C}$  and then extracted with EtOAc (4 x 150 mL). The combined organic extracts were washed with 0.1 M aqueous HCl (50 mL), 1 M NaOH (2 x 50 mL), and brine (40 mL). The organic layer was dried over  $\text{Na}_2\text{SO}_4$ , filtered and concentrated. The residue was purified by flash column chromatography ( $\text{SiO}_2$ , 40%  $\text{Et}_2\text{O}$ /hexanes) to afford **S7** (14.3 g, 91%) as a colorless, viscous oil. Analytical data for II-62: IR (film) 3338, 2929, 1889,

1825, 1427, 1107  $\text{cm}^{-1}$ ;  $^1\text{H}$  NMR, (500 MHz,  $\text{CDCl}_3$ )  $\delta$  7.69–7.68 (m, 4H), 7.45–7.38 (m, 6H), 3.74–3.68 (m, 2H), ), 3.51–3.48 (m, 1H), 3.40–3.35 (m, 1H), 1.73–1.69 (m, 2H), 1.68–1.63 (m, 2H), 1.32–1.26 (m, 2H), 1.06 (s, 9H), 0.93–0.91 (d,  $J = 6.7\text{Hz}$ , 3H), 0.86–0.84 (d,  $J = 6.71\text{ Hz}$ , 3H);  $^{13}\text{C}$  NMR (125 MHz,  $\text{CDCl}_3$ )  $\delta$  135.8, 134.3, 129.7, 127.8, 68.6, 62.2, 41.2, 39.3, 33.3, 27.1, 26.9, 20.6, 19.4, 17.3; LRMS (ESI): Mass calcd for  $\text{C}_{24}\text{H}_{36}\text{O}_2\text{SiNa}$   $[\text{M}+\text{Na}]^+$ , 407.63. Found 407.26;  $[\alpha]_{\text{D}}^{20} +9.5$  ( $\text{CH}_2\text{Cl}_2$ ,  $c$  0.95).

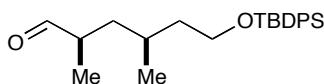

**(2R,4S)-6-(tert-butylidiphenylsilyloxy)-2,4-dimethylhexanal (13).** To a suspension of powdered 4Å molecular sieves (8.4 g) and **S7** (3.8 g, 9.89 mmol) in  $\text{CH}_2\text{Cl}_2$  (68 mL) was added NMO (1.85 g, 15.8 mmol) followed by TPAP (172 mg, 0.49 mmol). After 45 min the green reaction mixture was filtered through Celite (eluting with  $\text{CH}_2\text{Cl}_2$ ) and concentrated *in vacuo* to approximately 15 mL. The resulting material was filtered through  $\text{SiO}_2$  (eluting with 40%  $\text{Et}_2\text{O}$ /hexanes, 300 mL). Removal of the solvent *in vacuo* afforded aldehyde **13** (3.45 g, 92%) as a colorless oil. Aldehyde **13** was used directly in the next step.

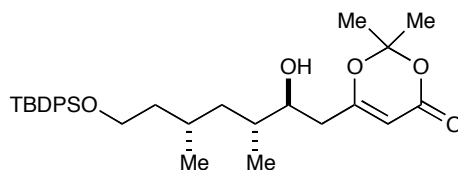

**6-((2S,3R,5S)-7-(tert-butylidiphenylsilyloxy)-2-hydroxy-3,5-dimethylheptyl)-2,2-dimethyl-4H-1,3-dioxin-4-one (15).** A mixture of  $\text{Cu}(\text{OTf})_2$  (651 mg, 1.8 mmol) and (*R*)-Tol-BINAP (1.5 g, 2.25 mmol) in THF (58 mL) was stirred at room temperature under  $\text{N}_2$  for 15 minutes to yield a clear yellow solution. A solution of  $\text{Bu}_4\text{NPh}_3\text{SiF}_2$  (1.5 g, 2.7 mmol) in THF (16 mL) was added via cannula and the resulting solution was stirred for 15 minutes. The mixture was cooled to  $-78\text{ }^\circ\text{C}$  and enol silane **14** (2.5 g, 11.7 mmol) was added dropwise followed immediately by a solution of **13** (3.45 g, 9.0 mmol) in THF (6.4 mL). The mixture was warmed to  $-50\text{ }^\circ\text{C}$  and allowed to stir for 24 h. Trifluoroacetic acid (3.6 mL) was added at  $-78\text{ }^\circ\text{C}$  and the solution was allowed to warm to  $23\text{ }^\circ\text{C}$ . Stirring was continued for 1 h. The reaction mixture was diluted with  $\text{EtOAc}$  (90 mL) and saturated  $\text{NaHCO}_3$  was added dropwise until gas evolution ceased. The organic layer was washed with brine (30 mL), dried over  $\text{Na}_2\text{SO}_4$  and concentrated. The residue was purified by flash column chromatography (65%  $\text{Et}_2\text{O}$ /hexanes) to afford  $\beta$ -hydroxy-dioxinone **15** (2.90 g, 61%) as an inseparable mixture of diastereomers (dr 7:1). Analytical data: IR (film) 3453, 2930, 1718, 1631, 1384  $\text{cm}^{-1}$ ;  $^1\text{H}$  NMR, (500 MHz,  $\text{CDCl}_3$ )  $\delta$  7.69–7.67 (m, 4H), 7.46–7.38 (m, 6H), 5.34 (s, 1H), 3.76–3.67 (m, 3H), 2.36–2.33 (dd,  $J = 14.3, 3.0\text{ Hz}$ , 1H), 2.28–2.23 (dd,  $J = 14.6, 9.7\text{ Hz}$ , 1H), 1.76–1.72 (m, 2H), 1.70 (s, 6H), 1.67–1.62 (m, 2H), 1.33–1.32 (m, 1H), 1.23–1.20 (m, 1H), 1.06 (s, 9H), 0.93–0.92 (d,  $J = 6.7\text{ Hz}$ , 3H), 0.88–0.87 (d,  $J = 6.7\text{ Hz}$ , 3H);  $^{13}\text{C}$  NMR (125 MHz,  $\text{CDCl}_3$ )  $\delta$  170.2, 161.3, 135.8, 134.2, 129.8, 127.8, 106.8, 95.2, 73.0, 62.1, 40.0, 38.7, 38.0, 36.6,

27.1, 25.6, 24.9, 20.9, 19.4, 15.5, 13.6; LRMS (ESI): Mass calculated for  $C_{31}H_{48}NO_5Si$   $[M+NH_4]^+$ , 542.33. Found 542.51;  $[\alpha]_D^{20}$   $-1.7$  ( $CH_2Cl_2$ ,  $c$  1.0).

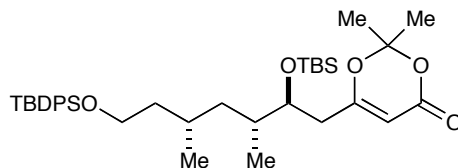

**6-((2S,3R,5S)-2-(tert-butyldimethylsilyloxy)-7-(tert-butyldiphenylsilyloxy)-3,5-dimethylheptyl)-2,2-dimethyl-4H-1,3-dioxin-4-one (S8).** To a 0 °C solution of **15** (2.90 g, 5.49 mmol) in  $CH_2Cl_2$  (58 mL) was added 2,6-lutidine (1.9 mL, 16.5 mmol) and TBSOTf (1.3 mL, 6.0 mmol). The resulting solution was stirred at 0 °C for 90 minutes and quenched by the addition of saturated  $NaHCO_3$  (120 ml). The aqueous layer was extracted with EtOAc (3x 15 ml). The combined organic layers were dried over  $Na_2SO_4$ , filtered and concentrated. The resulting residue was purified by flash column chromatography (40% Et<sub>2</sub>O/hexanes) to afford bis silyl ether **S8** (3.3 g, 92%) as a clear oil. Analytical data: IR (film) 1736, 1636, 1461, 1384  $cm^{-1}$ ; <sup>1</sup>H NMR, (500 MHz,  $CDCl_3$ )  $\delta$  7.68-7.67 (m, 4H), 7.45-7.37 (m, 6H), 5.27 (s, 1H), 3.87-3.84 (ddd,  $J = 8.8, 6.7, 5.1$  Hz, 1H), 3.75-3.66 (m, 2H), 2.24-2.22 (dd,  $J = 6.7, 1.5$  Hz, 1H), 1.81-1.79 (m, 1H), 1.68 (s, 3H), 1.66 (s, 3H), 1.21-1.18 (dd,  $J = 13.4, 6.1$ , 1H), 1.06 (s, 9H), 1.02-0.97 (m, 1H), 0.89 (s, 9H), 0.87-0.86 (d,  $J = 6.7$ , 3H), 0.86-0.82 (m, 4H), 0.79-0.78 (d,  $J = 6.4$  Hz, 3H), 0.06 (s, 3H), 0.03 (s, 3H); <sup>13</sup>C NMR (125 MHz,  $CDCl_3$ )  $\delta$  170.5, 161.3, 135.7, 134.2, 129.8, 127.8, 106.5, 95.4, 72.9, 62.1, 40.9, 39.2, 37.5, 36.3, 27.1, 26.1, 26.0, 24.4, 20.7, 19.4, 18.2, 14.5,  $-4.1, -4.5$ ; LRMS (ESI): Mass calculated for  $C_{74}H_{120}NO_{10}Si_4$   $[2M+NH_4]^+$ , 1294.8. Found 1294.03;  $[\alpha]_D^{20}$   $-9.9$  ( $CH_2Cl_2$ ,  $c$  1.0).

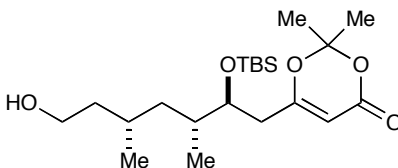

**6-((2S,3R,5S)-2-(tert-butyldimethylsilyloxy)-7-hydroxy-3,5-dimethylheptyl)-2,2-dimethyl-4H-1,3-dioxin-4-one (S9).** To a 23 °C solution of bis silyl ether **S8** (3.3 g, 5.05 mmol) in MeOH (106 mL) was added  $NH_4F$  (18.7 g, 505 mmol). The resulting mixture was warmed to 40 °C for 24 h. The solvent was removed *in vacuo* and the resulting residue was purified by flash column chromatography (75% Et<sub>2</sub>O/hexanes) to afford **S9** (1.9 g, 92%) as a clear oil. Analytical data: IR (film) 3444, 2931, 1715, 1635, 1461, 1384  $cm^{-1}$ ; <sup>1</sup>H NMR, (500 MHz,  $CDCl_3$ )  $\delta$  5.27 (s, 1H), 3.88-3.85 (ddd,  $J = 11.2, 7.6, 3.9$  Hz, 1H), 3.72-3.64 (m, 2H), 2.25-2.24 (dd,  $J = 3.6, 1.2$ , Hz, 1H), 1.75 (m, 1H), 1.70 (s, 3H), 1.68 (s, 3H), 1.64-1.62 (m, 2H), 1.41 (br s, 1H), 1.30-1.29 (m, 1H), 1.28-1.25 (m, 1H), 1.05-1.00 (m, 1H), 0.95-0.94 (d,  $J = 6.4$  Hz, 3H), 0.90-0.88 (d,  $J = 7.0$  Hz, 3H), 0.87 (s, 9H), 0.05 (s, 3H), 0.02 (s, 3H); <sup>13</sup>C NMR (125 MHz,  $CDCl_3$ )  $\delta$  170.4, 161.3, 106.5, 95.4, 72.7, 61.0, 40.6, 39.4, 37.5, 36.3, 27.1, 26.0, 24.5, 20.8, 18.2, 14.7,  $-4.1, -4.5$ ; LRMS (ESI): Mass calculated for  $C_{42}H_{80}NaO_{10}Si_2$   $[2M+Na]^+$ , 823.52. Found 823.62;  $[\alpha]_D^{25}$   $-22.7$  ( $CH_2Cl_2$ ,  $c$  1.0).

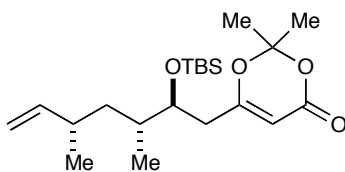

**6-((2S,3R,5S)-2-(tert-butyl dimethylsilyloxy)-3,5-dimethylhept-6-enyl)-2,2-dimethyl-4H-1,3-dioxin-4-one (16).** To a 23 °C solution of **S9** (1.9 g, 4.64 mmol) in THF (22.5 mL) was added 2-nitrophenylselenocyanide (1.7 g, 7.42 mmol) and *n*-Bu<sub>3</sub>P (1.8 mL, 7.42 mmol). The resulting solution stirred at 23 °C for 30 min. The mixture was then passed through a short plug of SiO<sub>2</sub> (eluting with 60% Et<sub>2</sub>O/ hexanes) and concentrated. The resulting residue was purified by flash column chromatography (40% Et<sub>2</sub>O/hexanes) to afford the intermediate organoselenide as a yellow oil. This oil was dissolved in THF (39 ml) and cooled to 0 °C. Hydrogen peroxide (30%, 8.1 mL) was added slowly. The resulting mixture was allowed to stir for 12 h at 0 °C. The reaction was quenched by the slow addition of saturated Na<sub>2</sub>SO<sub>3</sub> (50 mL) at 0 °C. The aqueous layer was extracted with EtOAc (3 x 15 ml) and the combined organic layers were dried over Na<sub>2</sub>SO<sub>4</sub>, filtered and concentrated. The resulting residue was purified by flash column chromatography (40% Et<sub>2</sub>O/hexanes) to afford **16** oil (1.35 g, 76%) as a yellow oil. Analytical data: IR (film) 2962, 1735, 1636, 1265 cm<sup>-1</sup>; <sup>1</sup>H NMR, (500 MHz, CDCl<sub>3</sub>) δ 5.58-5.51 (ddd, *J* = 17.1, 10.0, 8.8 Hz, 1H), 5.25 (s, 1H), 4.98-4.94 (d, *J* = 17.1 Hz, 1H), 4.94-4.93 (d, *J* = 10.0 Hz, 1H), 3.82-3.79 (ddd, *J* = 9.8, 6.4, 5.8 Hz, 1H), 2.26-2.25 (d, *J* = 6.1 Hz, 1H), 2.23-2.21 (m, 1H), 1.69 (s, 3H), 1.67 (s, 3H), 1.27-1.21 (m, 2H), 1.09-1.04 (m, 2H), 1.02-1.01 (d, *J* = 6.7 Hz, 3H), 0.87 (s, 9H), 0.84-0.83 (d, *J* = 7.0 Hz, 3H), 0.03 (s, 3H), 0.02 (s, 3H); <sup>13</sup>C NMR (125 MHz, CDCl<sub>3</sub>) δ 170.2, 161.3, 144.2, 113.6, 106.5, 95.4, 73.5, 39.7, 37.9, 36.3, 36.1, 26.0, 24.5, 22.0, 18.2, 14.2, -4.1, -4.5; LRMS (ESI): Mass calcd for C<sub>42</sub>H<sub>76</sub>NaO<sub>8</sub>Si<sub>2</sub> [2M+Na]<sup>+</sup>, 787.5. Found 787.7; [α]<sub>D</sub><sup>20</sup> -22.1 (CH<sub>2</sub>Cl<sub>2</sub>, *c* 1.0).

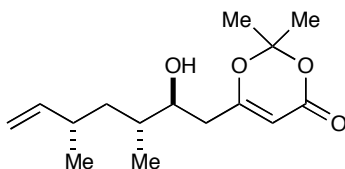

**6-((2S,3R,5S)-2-hydroxy-3,5-dimethylhept-6-enyl)-2,2-dimethyl-4H-1,3-dioxin-4-one (4).** To a plastic bottle with stir bar containing a 0 °C solution of silyl ether **16** (3.0 g, 7.8 mmol) in THF (165 mL) was added HF·pyr (14 mL, 161 mmol) dropwise by plastic syringe. The solution was stirred at room temperature, additional HF·pyr (3 mL) was added every 24 hours and the reaction was monitored by TLC until complete consumption of starting material was observed. The solution was re-cooled to 0 °C and carefully quenched with saturated aqueous NaHCO<sub>3</sub>. The aqueous layer was extracted with EtOAc (3x) and the combined organic layers were dried over Na<sub>2</sub>SO<sub>4</sub> and concentrated. The residue was purified by flash column chromatography (30% EtOAc/hexanes) to afford β-hydroxy dioxinone **4** (2.0 g, 93%) as a colorless oil. Analytical data: IR (film) 3459, 2962, 1716, 1635, 1392, 1276, 1205, 1015, 907, 805 cm<sup>-1</sup>; <sup>1</sup>H NMR (500 MHz; CDCl<sub>3</sub>): δ 5.55 (ddd, *J* = 17.2, 10.1, 8.6 Hz, 1H), 5.33 (s, 1H),

4.99-4.92 (m, 2H), 3.73 (dtd,  $J = 9.5, 4.8, 3.3$  Hz, 1H), 2.37 (dd,  $J = 14.6, 3.1$  Hz, 1H), 2.28 (dd,  $J = 14.6, 9.5$  Hz, 1H), 2.22 (dtd,  $J = 10.7, 7.5, 3.2$  Hz, 1H), 1.70 (s, 6H), 1.63 (d,  $J = 5.1$  Hz, 1H), 1.38 (ddd,  $J = 13.5, 10.7, 3.0$  Hz, 1H), 1.10 (ddd,  $J = 13.7, 10.3, 3.7$  Hz, 1H), 1.02 (d,  $J = 6.7$  Hz, 3H), 0.92 (d,  $J = 6.8$  Hz, 3H);  $^{13}\text{C}$  NMR (125 MHz;  $\text{CDCl}_3$ ):  $\delta$  169.8, 161.0, 143.7, 113.7, 106.6, 95.0, 73.1, 38.7, 38.1, 36.5, 35.8, 25.4, 24.7, 21.9, 14.9; LRMS (ESI): Mass calcd for  $\text{C}_{15}\text{H}_{25}\text{O}_4$   $[\text{M}+\text{H}]^+$ , 269.17. Found  $[\text{M}+\text{H}]^+$ , 269.14;  $[\alpha]_{\text{D}}^{20}$   $-24.8$  ( $\text{CHCl}_3$ ,  $c$  0.52).

### Synthesis of $\delta$ -Hydroxy $\beta$ -Ketoester 17

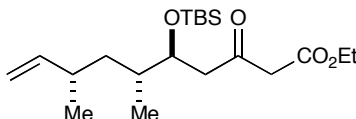

**(5S,6R,8S)-ethyl 5-(tert-butyldimethylsilyloxy)-6,8-dimethyl-3-oxodec-9-enoate (S10)**. To a flame-dried, round-bottom flask with stir bar containing a  $0\text{ }^\circ\text{C}$  solution of  $\beta$ -silyloxy dioxinone **16** (2.25 g, 5.9 mmol) in  $\text{CH}_2\text{Cl}_2$  (30 mL) was added KOEt (2.1 g, 24 mmol) in one portion. The solution was stirred for 30 min at  $0\text{ }^\circ\text{C}$ , warmed to room temperature for 4 h, and quenched with brine. The mixture was diluted with water and the aqueous layer was extracted with  $\text{CH}_2\text{Cl}_2$  (3x). The combined organic layers were dried over  $\text{Na}_2\text{SO}_4$  and concentrated. The residue was purified by flash column chromatography (5% EtOAc/hexanes) to afford  $\delta$ -silyloxy  $\beta$ -ketoester **S10** (1.91 g, 88%) as a colorless oil. Analytical data: IR (film) 2958, 2930, 1749, 1721, 1642, 1463, 1252, 1076, 836, 776  $\text{cm}^{-1}$ ;  $^1\text{H}$  NMR (500 MHz;  $\text{CDCl}_3$ ):  $\delta$  5.54 (ddd,  $J = 17.2, 10.2, 8.3$  Hz, 1H), 4.99-4.91 (m, 2H), 4.22-4.16 (m, 3H), 4.07 (dt,  $J = 8.9, 3.5$  Hz, 1H), 3.50-3.42 (m, 2H), 2.67 (dd,  $J = 15.3, 8.9$  Hz, 1H), 2.38 (dd,  $J = 15.3, 3.2$  Hz, 1H), 2.20-2.15 (m, 1H), 1.70-1.64 (m, 1H), 1.27 (t,  $J = 7.1$  Hz, 3H), 1.18 (ddd,  $J = 13.5, 10.0, 3.6$  Hz, 1H), 0.99 (d,  $J = 6.7$  Hz, 3H), 0.86 (d,  $J = 6.5$  Hz, 3H), 0.85 (s, 9H), 0.03 (s, 3H),  $-0.01$  (s, 3H);  $^{13}\text{C}$  NMR (125 MHz;  $\text{CDCl}_3$ ):  $\delta$  202.6, 167.1, 144.0, 113.3, 72.8, 61.2, 51.1, 45.3, 40.0, 36.4, 35.8, 25.84, 25.80, 21.6, 18.0, 14.1, 13.5,  $-4.6$ ,  $-4.9$ ; LRMS (ESI): Mass calcd for  $\text{C}_{20}\text{H}_{38}\text{O}_4\text{SiNa}$   $[\text{M}+\text{Na}]^+$ , 393.24. Found  $[\text{M}+\text{Na}]^+$ , 393.32;  $[\alpha]_{\text{D}}^{20}$   $-41.6$  (MeOH,  $c$  1.02).

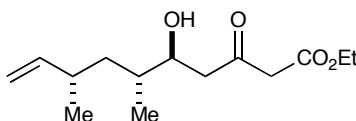

**(5S,6R,8S)-ethyl 5-hydroxy-6,8-dimethyl-3-oxodec-9-enoate (17)**. To a plastic vial with stir bar containing a  $0\text{ }^\circ\text{C}$  solution of silyl ether **S10** (52 mg, 0.14 mmol) in THF (2.7 mL) was added  $\text{HF}\cdot\text{pyr}$  (0.25 mL, 2.9 mmol) dropwise by plastic syringe. After the solution was stirred at  $0\text{ }^\circ\text{C}$  for 24 h and then at room temperature for 24 h, it was carefully quenched with saturated aqueous  $\text{NaHCO}_3$ . The mixture was diluted with  $\text{CH}_2\text{Cl}_2$  (10 mL), filtered through a Biotage ISOLUTE® phase separator, and the organic filtrate was concentrated. The residue was purified by flash column chromatography (25% EtOAc/hexanes) to afford  $\delta$ -hydroxy  $\beta$ -ketoester **17** (32.6 mg, 94%) as a colorless oil. Analytical data: IR (film) 3524, 2964, 1743, 1713, 1643, 1461, 1412, 1318, 1031, 912  $\text{cm}^{-1}$ ;  $^1\text{H}$ -NMR (500 MHz;  $\text{CDCl}_3$ ):  $\delta$  5.56 (ddd,  $J = 17.2, 10.1, 8.5$  Hz, 1H), 4.98-

4.91 (m, 2H), 4.20 (q,  $J = 7.1$  Hz, 2H), 3.92 (dq,  $J = 8.5, 4.3$  Hz, 1H), 3.48 (d,  $J = 1.6$  Hz, 2H), 2.66 (m, 3H), 2.21 (dtd,  $J = 14.4, 7.2, 3.7$  Hz, 1H), 1.64-1.57 (m, 1H), 1.39 (ddd,  $J = 13.5, 10.5, 3.2$  Hz, 1H), 1.28 (t,  $J = 7.1$  Hz, 3H), 1.07 (ddd,  $J = 13.7, 10.1, 3.9$  Hz, 1H), 1.00 (d,  $J = 6.7$  Hz, 3H), 0.88 (d,  $J = 6.8$  Hz, 3H);  $^{13}\text{C}$  NMR (125 MHz;  $\text{CDCl}_3$ ):  $\delta$  204.2, 166.9, 143.9, 113.4, 71.5, 61.5, 50.0, 46.2, 39.1, 35.71, 35.62, 21.8, 14.8, 14.1; LRMS (ESI): Mass calcd for  $\text{C}_{14}\text{H}_{28}\text{NO}_4$   $[\text{M}+\text{NH}_4]^+$ , 274.20. Found  $[\text{M}+\text{NH}_4]^+$ , 274.12;  $[\alpha]_{\text{D}}^{20} -22.2$  ( $\text{CHCl}_3$ ,  $c$  0.32).

### Synthesis of Trioxabicyclooctane 18

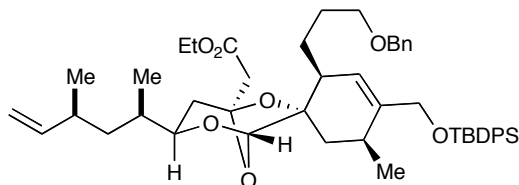

**Ethyl** **2-((1*S*,1'*S*,2'*S*,3*R*,5*R*,5'*S*)-2'-(3-(benzyloxy)propyl)-4'-((*tert*-butyldiphenylsilyloxy)methyl)-5'-methyl-3-((2*R*,4*S*)-4-methylhex-5-en-2-yl)-2,6,8-trioxaspiro[bicyclo[3.2.1]octane-7,1'-cyclohex[3]ene]-5-yl)acetate (18)**. To a flame-dried 1-dram vial containing a 0 °C solution of  $\alpha$ -hydroxy aldehyde **3** (27 mg, 0.048 mmol),  $\delta$ -hydroxy- $\beta$ -ketoester **17** (12.2 mg, 0.048 mmol), and 4Å molecular sieves (27 mg) in  $\text{CH}_2\text{Cl}_2$  (0.4 mL) was added  $\text{BF}_3 \cdot \text{OEt}_2$  (18  $\mu\text{L}$ , 0.14 mmol) dropwise by syringe. The reaction mixture was stirred at 0 °C for 4 h and warmed to room temperature for 12 h. The reaction mixture was quenched with 1.0 M pH 7 phosphate buffer, diluted with  $\text{CH}_2\text{Cl}_2$ , filtered through a Biotage ISOLUTE® phase separator and concentrated. The residue was purified by flash column chromatography (4%-15% EtOAc/hexanes, gradient) to afford trioxabicyclooctane **18** (13.4 mg, 35%) as a colorless oil. Analytical data: IR (film) 2929, 2856, 1736, 1719, 1471, 1462, 1427, 1112, 821, 701  $\text{cm}^{-1}$ ;  $^1\text{H}$  NMR (500 MHz;  $\text{CDCl}_3$ ):  $\delta$  7.72-7.67 (m, 4H), 7.42-7.31 (m, 11H), 5.90 (d,  $J = 3.7$  Hz, 1H), 5.57 (ddd,  $J = 17.2, 10.0, 8.4$  Hz, 1H), 5.08 (s, 1H), 4.98-4.89 (m, 2H), 4.48 (d,  $J = 4.2$  Hz, 2H), 4.21-4.08 (m, 5H), 3.52-3.43 (m, 2H), 2.79 (s, 2H), 2.58-2.50 (m, 2H), 2.25-2.19 (m, 1H), 1.94-1.79 (m, 4H), 1.63 (tdd,  $J = 15.0, 7.4, 3.7$  Hz, 3H), 1.52 (ddd,  $J = 13.5, 10.5, 3.0$  Hz, 1H), 1.34 (t,  $J = 12.1$  Hz, 1H), 1.24 (t,  $J = 7.1$  Hz, 3H and m, 1H), 1.05 (s, 9H), 1.05-1.00 (m, 1H), 0.98 (d,  $J = 6.6$  Hz, 3H), 0.91 (d,  $J = 7.0$  Hz, 3H), 0.85 (d,  $J = 6.7$  Hz, 3H);  $^{13}\text{C}$  NMR (125 MHz;  $\text{CDCl}_3$ ):  $\delta$  168.6, 144.2, 140.1, 138.6, 135.62, 135.59, 135.1, 134.8, 133.90, 133.74, 129.70, 129.58, 129.55, 128.4, 127.76, 127.65, 127.57, 127.52, 122.1, 113.2, 106.1, 101.3, 86.6, 75.4, 72.8, 70.6, 65.3, 60.8, 44.4, 39.03, 38.95, 37.31, 37.12, 35.69, 35.66, 31.2, 27.8, 27.6, 26.8, 26.6, 21.9, 19.3, 18.6, 14.42, 14.23; LRMS (ESI): Mass calcd for  $\text{C}_{49}\text{H}_{70}\text{NO}_7\text{Si}$   $[\text{M}+\text{NH}_4]^+$ , 812.49. Found  $[\text{M}+\text{NH}_4]^+$ , 812.44;  $[\alpha]_{\text{D}}^{20} +23.9$  ( $\text{CHCl}_3$ ,  $c$  0.62).

## Synthesis of (–)-Okilactomycin 1

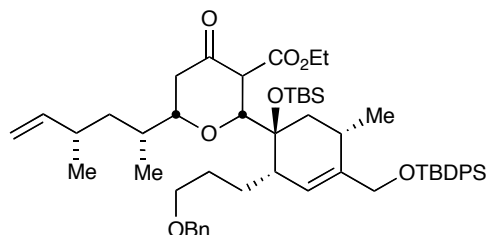

**(2R,6S)-ethyl 2-((1S,2S,5S)-2-(3-(benzyloxy)propyl)-1-(tert-butyldimethylsilyloxy)-4-((tert-butyldiphenylsilyloxy)methyl)-5-methylcyclohex-3-enyl)-6-((2R,4S)-4-methylhex-5-en-2-yl)-4-oxotetrahydro-2H-pyran-3-carboxylate (22).** To a flame-dried, round-bottom flask with stir bar containing a  $-78\text{ }^{\circ}\text{C}$  solution of  $\alpha$ -silyloxy aldehyde **21** (1.4 g, 2.1 mmol),  $\delta$ -hydroxy- $\beta$ -ketoester **17** (0.59 g, 2.3 mmol), 4Å molecular sieves (1.4 g), and  $\text{CH}_2\text{Cl}_2$  (17.5 mL) was added trimethylsilyltriflate (0.38 mL, 2.1 mmol) dropwise by syringe. The reaction was warmed to  $-40\text{ }^{\circ}\text{C}$ , stirred for 45 min, re-cooled to  $-78\text{ }^{\circ}\text{C}$  and quenched with 1.0 M pH 7 phosphate buffer. The mixture was filtered through a Biotage ISOLUTE® phase separator and the organic filtrate was concentrated. The residue was purified by flash column chromatography (2% to 6% EtOAc/hexanes, gradient) to afford tetrahydropyranone **22** (1.15 g, 60%) in a 13:1 ratio of diastereomers as a colorless oil. Analytical data: IR (film) 3071, 2929, 1746, 1713, 1472, 1369, 1250, 1111, 834, 774, 740, 701  $\text{cm}^{-1}$ ;  $^1\text{H}$  NMR (500 MHz;  $\text{CDCl}_3$ ):  $\delta$  7.67 (td,  $J = 7.2, 1.4$  Hz, 4H), 7.42-7.30 (m, 11H), 5.86 (d,  $J = 4.6$  Hz, 1H), 5.55 (ddd,  $J = 17.2, 10.1, 8.4$  Hz, 1H), 4.99-4.92 (m, 2H), 4.46 (d,  $J = 2.0$  Hz, 2H), 4.18 (m, 3H), 4.11 (d,  $J = 13.1$  Hz, 1H), 4.05 (d,  $J = 13.2$  Hz, 1H), 3.69 (d,  $J = 9.3$  Hz, 1H), 3.59 (ddd,  $J = 11.3, 5.6, 3.2$  Hz, 1H), 3.42 (t,  $J = 6.3$  Hz, 2H), 2.47-2.39 (m, 2H), 2.27 (dd,  $J = 16.0, 11.4$  Hz, 1H), 2.22-2.16 (m, 2H), 1.84-1.71 (m, 3H), 1.48-1.42 (m, 2H), 1.31-1.24 (m, 2H and t,  $J = 7.1$  Hz, 3H), 1.08 (q,  $J = 5.1$  Hz, 1H), 1.05 (s, 9H and m, 1H), 1.00 (d,  $J = 6.7$  Hz, 3H), 0.92 (d,  $J = 7.0$  Hz, 3H), 0.88 (d,  $J = 6.7$  Hz, 3H), 0.82 (s, 9H), 0.10 (s, 3H), 0.04 (s, 3H);  $^{13}\text{C}$  NMR (125 MHz;  $\text{CDCl}_3$ ):  $\delta$  204.0, 169.3, 143.8, 138.6, 138.2, 135.61, 135.49, 133.71, 133.66, 129.56, 129.48, 128.3, 127.68, 127.60, 127.57, 127.46, 123.3, 113.5, 79.9, 78.9, 72.8, 70.7, 65.5, 61.5, 43.3, 42.1, 39.4, 36.3, 35.59, 35.40, 31.6, 28.5, 27.7, 26.8, 26.1, 21.7, 19.3, 18.9, 14.0,  $-1.9, -2.7$ ; LRMS (ESI): Mass calcd for  $\text{C}_{55}\text{H}_{84}\text{NO}_7\text{Si}_2$   $[\text{M}+\text{NH}_4]^+$ , 926.58. Found  $[\text{M}+\text{NH}_4]^+$ , 926.45;  $[\alpha]_{\text{D}}^{20} +26.5^{\circ}$  ( $\text{CHCl}_3$ ,  $c$  0.68).

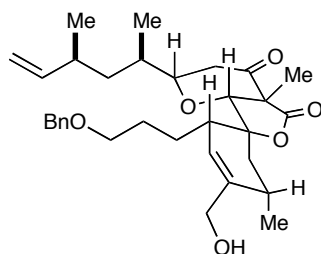

**(1S,2S,2'S,4a'R,5S,7a'R)-2-(3-(benzyloxy)propyl)-4-(hydroxymethyl)-4a',5-dimethyl-2'-((2R,4S)-4-methylhex-5-en-2-yl)-2',3'-dihydrospiro[cyclohex[3]ene-1,7'-furo[3,4-b]pyran]-4',5'(4a'H,7a'H)-dione (23).** To a plastic vial with stir bar containing



tetrahydropyranone **22** (0.10 g, 0.11 mmol) in CH<sub>3</sub>CN (11 mL) was added aqueous HF (2.9 mL, 48% in water). The solution was stirred at room temperature for 18 h and carefully poured into a flask containing saturated aqueous NaHCO<sub>3</sub> (50 mL). NaHCO<sub>3(s)</sub> was added until the pH > 7. The mixture was diluted with EtOAc and the aqueous layer was extracted with EtOAc (3x). The combined organic layers were washed with saturated aqueous NaHCO<sub>3</sub> (2x) and brine (1x), dried over Na<sub>2</sub>SO<sub>4</sub>, and concentrated. The residue was dissolved in THF (5.5 mL) in a scintillation vial. To the solution was added KO<sup>t</sup>-Bu (12.3 mg, 0.11 mmol) in one portion. The solution was stirred for 15 min and quenched with saturated aqueous NH<sub>4</sub>Cl. The mixture was diluted with water and CH<sub>2</sub>Cl<sub>2</sub>, filtered through a Biotage ISOLUTE® phase separator and the organic filtrate was concentrated. The residue was dissolved in CH<sub>3</sub>CN (2.2 mL) in a scintillation vial. To the solution was added K<sub>2</sub>CO<sub>3</sub> (63 mg, 0.46 mmol) and MeI (70 μL, 1.1 mmol). The reaction mixture was heated to 70 °C for 2 h, re-cooled to room temperature and quenched with saturated aqueous NH<sub>4</sub>Cl. The mixture was diluted with CH<sub>2</sub>Cl<sub>2</sub> and filtered through a Biotage ISOLUTE® phase separator and the organic filtrate was concentrated. The residue was purified by flash column chromatography (20% to 30% to 35% EtOAc/hexanes) to afford lactone **23** (35 mg, 61%) as a colorless oil. Analytical data: IR (film) 3420, 2956, 2926, 2869, 1778, 1717, 1455, 1210, 1099, cm<sup>-1</sup>; <sup>1</sup>H NMR (500 MHz; CDCl<sub>3</sub>): δ 7.36-7.28 (m, 5H), 5.71 (dd, *J* = 5.2, 1.3 Hz, 1H), 5.55 (ddd, *J* = 17.2, 10.2, 8.3 Hz, 1H), 5.00-4.93 (m, 2H), 4.50 (d, *J* = 2.1 Hz, 2H), 4.28 (s, 1H), 4.15-4.12 (m, 1H), 4.07 (d, *J* = 13.6 Hz, 1H), 3.65 (ddd, *J* = 11.2, 6.3, 3.6 Hz, 1H), 3.54-3.46 (m, 2H), 2.59 (dd, *J* = 17.4, 3.5 Hz, 1H), 2.54-2.49 (m, 1H), 2.40 (dd, *J* = 17.4, 11.3 Hz, 1H), 2.25-2.17 (m, 2H), 1.93-1.82 (m, 3H), 1.72 (dtd, *J* = 9.9, 6.6, 3.3 Hz, 1H), 1.63 (td, *J* = 8.7, 4.1 Hz, 1H), 1.58 (s, 3H), 1.48-1.43 (m, 2H), 1.28-1.23 (m, 1H), 1.06 (m, 4H), 1.01 (d, *J* = 6.7 Hz, 3H), 0.89 (d, *J* = 6.8 Hz, 3H); <sup>13</sup>C NMR (125 MHz; CDCl<sub>3</sub>): δ 202.0, 171.9, 143.7, 141.3, 138.3, 128.4, 127.6, 121.9, 113.6, 88.3, 84.0, 78.0, 73.0, 69.8, 64.7, 55.6, 43.3, 41.5, 39.2, 35.6, 33.2, 30.0, 28.3, 27.1, 21.88, 21.86, 18.6, 14.5; LRMS (ESI): Mass calcd for C<sub>32</sub>H<sub>45</sub>O<sub>6</sub> [M+H]<sup>+</sup>, 525.32. Found [M+H]<sup>+</sup>, 525.30; [α]<sub>D</sub><sup>20</sup> +32.8 (CHCl<sub>3</sub>, *c* 0.09).

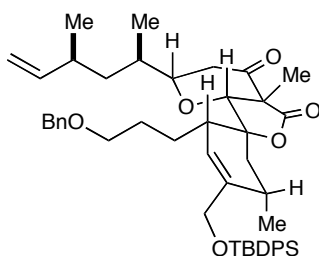

**(1S,2S,2'S,4a'R,5S,7a'R)-2-(3-(benzyloxy)propyl)-4-((tert-butyl)diphenylsilyloxy)methyl)-4a',5-dimethyl-2'-((2R,4S)-4-methylhex-5-en-2-yl)-2',3'-dihydrospiro[cyclohex[3]ene-1,7'-furo[3,4-b]pyran]-4',5'(4a'H,7a'H)-dione (S11)**. To a flame-dried, round-bottom flask with stir bar containing a 0 °C solution of allylic alcohol **23** (210 mg, 0.40 mmol) in CH<sub>2</sub>Cl<sub>2</sub> (20 mL) was added imidazole (85 mg, 1.25 mmol) followed by *t*-butyldiphenylchlorosilane (0.23 mL, 0.89 mmol). The solution was stirred at room temperature for 3 h and quenched with saturated aqueous NaHCO<sub>3</sub>. The mixture was filtered through a Biotage ISOLUTE® phase separator and the organic filtrate was concentrated. The residue was purified by flash column chromatography (5%

to 20% EtOAc/hexanes) to afford silyl ether **S11** (280 mg, 92%) as a colorless oil. Analytical data: IR (film) 3071, 2930, 2857, 1780, 1719, 1455, 1206, 1112, 702  $\text{cm}^{-1}$ ;  $^1\text{H}$  NMR (500 MHz;  $\text{CDCl}_3$ ):  $\delta$  7.69 (td,  $J = 4.7, 2.7$  Hz, 4H), 7.43-7.36 (m, 6H), 7.35-7.28 (m, 5H), 5.81 (dd,  $J = 5.2, 1.4$  Hz, 1H), 5.56 (ddd,  $J = 17.2, 10.1, 8.3$  Hz, 1H), 5.01-4.94 (m, 2H), 4.50 (d,  $J = 2.6$  Hz, 2H), 4.30 (s, 1H), 4.16 (s, 2H), 3.65 (ddd,  $J = 11.1, 6.3, 3.5$  Hz, 1H), 3.53-3.47 (m, 2H), 2.59 (dd,  $J = 17.3, 3.4$  Hz, 1H), 2.47 (dt,  $J = 11.1, 5.8$  Hz, 1H), 2.41 (dd,  $J = 17.3, 11.3$  Hz, 1H), 2.26-2.20 (m, 2H), 1.92 (ddd,  $J = 14.4, 6.0, 1.5$  Hz, 1H), 1.89-1.80 (m, 2H), 1.72 (dtd,  $J = 9.8, 6.6, 3.3$  Hz, 1H), 1.64 (dd,  $J = 11.6, 5.8$  Hz, 1H), 1.60 (s, 3H), 1.49-1.42 (m, 2H), 1.29-1.22 (m, 1H), 1.08 (dd,  $J = 5.5, 3.7$  Hz, 1H), 1.05 (s, 9H), 1.02 (d,  $J = 6.7$  Hz, 3H), 0.96 (d,  $J = 7.0$  Hz, 3H), 0.89 (d,  $J = 6.8$  Hz, 3H);  $^{13}\text{C}$  NMR (125 MHz;  $\text{CDCl}_3$ ):  $\delta$  202.1, 171.8, 143.7, 140.1, 138.3, 135.47, 135.42, 133.62, 133.57, 129.58, 129.53, 128.4, 127.67, 127.60, 120.4, 113.5, 88.4, 84.0, 78.0, 72.9, 69.8, 65.1, 55.7, 43.1, 41.6, 39.1, 35.6, 33.3, 30.1, 28.4, 27.0, 26.7, 21.83, 21.74, 19.2, 18.7, 14.5; LRMS (ESI): Mass calcd for  $\text{C}_{48}\text{H}_{66}\text{NO}_6\text{Si}$   $[\text{M}+\text{NH}_4]^+$ , 780.47. Found  $[\text{M}+\text{NH}_4]^+$ , 780.47;  $[\alpha]_{\text{D}}^{20} +27.7$  ( $\text{CHCl}_3$ ,  $c$  0.94).

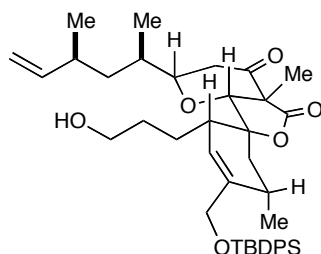

**(1S,2S,2'S,4a'R,5S,7a'R)-4-((tert-butyl)diphenylsilyloxy)methyl-2-(3-hydroxypropyl)-4a',5-dimethyl-2'-((2R,4S)-4-methylhex-5-en-2-yl)-2',3'-dihydrospiro[cyclohex[3]ene-1,7'-furo[3,4-b]pyran]-4',5'(4a'H,7a'H)-dione (S12)**. To a round-bottom flask containing a solution of benzyl alcohol **S11** (0.26 g, 0.34 mmol) in water (0.35 mL) and  $\text{CH}_2\text{Cl}_2$  (17.5 mL) was added DDQ (2.4 g, 10.5 mmol) in one portion. The reaction mixture was stirred for 22 h and quenched with saturated aqueous  $\text{NaHCO}_3$  (100 mL) and water (100 mL). The aqueous layer was extracted with  $\text{CH}_2\text{Cl}_2$  (3x) and the combined organic layers were dried with  $\text{Na}_2\text{SO}_4$  and concentrated. The residue was purified by flash column chromatography (25% to 35% EtOAc/hexanes) to afford primary alcohol **S12** (0.14 g, 62%) as a white foam. Analytical data: IR (film) 3449, 3071, 2930, 2858, 1774, 1718, 1458, 1383, 1112, 1060  $\text{cm}^{-1}$ ;  $^1\text{H}$  NMR (500 MHz;  $\text{CDCl}_3$ ):  $\delta$  7.68 (ddd,  $J = 7.6, 4.2, 1.9$  Hz, 4H), 7.43-7.38 (m, 6H), 5.80 (dd,  $J = 5.3, 1.6$  Hz, 1H), 5.57 (ddd,  $J = 17.2, 10.2, 8.3$  Hz, 1H), 5.01-4.94 (m, 2H), 4.31 (s, 1H), 4.15 (s, 2H), 3.70-3.65 (m, 3H), 2.60 (dd,  $J = 17.3, 3.4$  Hz, 1H), 2.49-2.46 (m, 1H), 2.41 (dd,  $J = 17.4, 11.3$  Hz, 1H), 2.25-2.19 (m, 2H), 1.91 (ddd,  $J = 14.5, 6.0, 1.7$  Hz, 1H), 1.88-1.83 (m, 1H), 1.80-1.69 (m, 2H), 1.64 (s, 3H), 1.60-1.53 (m, 2H), 1.50-1.42 (m, 2H), 1.27-1.20 (m, 2H), 1.08 (dd,  $J = 9.8, 4.1$  Hz, 1H), 1.04 (s, 9H), 1.01 (d,  $J = 6.7$  Hz, 3H), 0.95 (d,  $J = 7.0$  Hz, 3H), 0.89 (d,  $J = 6.8$  Hz, 3H);  $^{13}\text{C}$  NMR (125 MHz;  $\text{CDCl}_3$ ):  $\delta$  202.1, 171.8, 143.8, 140.3, 135.51, 135.46, 133.67, 133.58, 129.63, 129.57, 127.69, 127.62, 120.3, 113.5, 88.4, 84.1, 78.1, 65.1, 62.7, 55.7, 43.3, 41.7, 39.3, 35.66, 35.61, 33.3, 29.96, 29.87, 28.4, 26.8, 21.85, 21.83, 19.3, 18.7, 14.5; LRMS (ESI): Mass calcd for

$C_{41}H_{60}NO_6Si$   $[M+NH_4]^+$ , 690.42. Found  $[M+NH_4]^+$ , 690.63;  $[\alpha]_D^{20}$  +24.1 ( $CHCl_3$ ,  $c$  0.22).

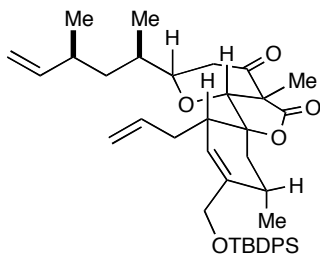

**(1*S*,2*S*,2'*S*,4*a'**R*,5*S*,7*a'**R*)-2-allyl-4-((*tert*-butyldiphenylsilyloxy)methyl)-4*a'*,5-dimethyl-2'-((*2*R*,4*S*)-4-methylhex-5-en-2-yl)-2',3'-dihydrospiro[cyclohex[3]ene-1,7'-furo[3,4-*b*]pyran]-4',5'(4*a'**H*,7*a'**H*)-dione (24)***. To a flame-dried scintillation vial with stir bar containing a solution of alcohol **S12** (130 mg, 0.19 mmol) in THF (2 mL) was added 2-nitrophenyl selenocyanate (80 mg, 0.35 mmol) followed by  $P(n\text{-Bu})_3$  (88  $\mu\text{L}$ , 0.35 mmol). The reaction mixture was stirred for 1 h, filtered through  $SiO_2$  (eluting with 60%  $Et_2O$ /hexanes) and concentrated. The residue was purified by flash column chromatography (20% to 40%  $EtOAc$ /hexanes) to afford an orange oil. The oil was added to a scintillation vial and dissolved in THF (1.5 mL). The solution was cooled to 0  $^\circ\text{C}$  and charged with hydrogen peroxide (0.33 mL, 30% in water). The solution was stirred at room temperature for 18 h, re-cooled to 0  $^\circ\text{C}$  and carefully quenched with  $\frac{1}{2}$  saturated  $Na_2S_2O_3$ . The mixture was diluted with  $CH_2Cl_2$ , filtered through a Biotage BIOTAGE ISOLUTE<sup>®</sup> phase separator and the organic filtrate was concentrated. The residue was purified by flash column chromatography to afford diene **24** (75 mg, 60%) as a yellow oil. Analytical data: IR (film) 3071, 2929, 1779, 1719, 1382, 1112, 1060  $cm^{-1}$ ;  $^1H$  NMR (500 MHz;  $CDCl_3$ ):  $\delta$  7.70-7.67 (m, 4H), 7.43-7.37 (m, 6H), 5.85-5.78 (m, 1H), 5.76 (dt,  $J = 5.1, 1.6$  Hz, 1H), 5.56 (ddd,  $J = 17.2, 10.2, 8.4$  Hz, 1H), 5.11-5.06 (m, 2H), 5.01-4.94 (m, 2H), 4.35 (s, 1H), 4.14 (s, 2H), 3.69 (ddd,  $J = 11.3, 6.2, 3.5$  Hz, 1H), 2.60 (dd,  $J = 17.4, 3.4$  Hz, 1H), 2.51-2.46 (m, 2H), 2.42 (dd,  $J = 17.4, 11.3$  Hz, 1H), 2.32-2.29 (m, 1H), 2.26-2.20 (m, 1H), 2.04-1.98 (m, 1H), 1.90 (ddd,  $J = 14.5, 6.0, 1.8$  Hz, 1H), 1.73 (dtd,  $J = 9.8, 6.6, 3.3$  Hz, 1H), 1.65 (s, 3H), 1.48-1.42 (m, 2H), 1.08 (dt,  $J = 9.2, 4.4$  Hz, 1H), 1.04 (s, 9H), 1.01 (d,  $J = 6.7$  Hz, 3H), 0.95 (d,  $J = 7.0$  Hz, 3H), 0.89 (d,  $J = 6.8$  Hz, 3H);  $^{13}C$  NMR (125 MHz;  $CDCl_3$ ):  $\delta$  202.1, 171.7, 143.7, 140.0, 135.50, 135.45, 135.39, 133.64, 133.61, 129.59, 129.54, 128.3, 127.67, 127.59, 120.6, 116.9, 113.6, 88.1, 84.0, 78.1, 64.9, 55.7, 43.6, 41.5, 39.2, 37.8, 35.66, 35.58, 33.5, 28.2, 26.7, 21.86, 21.82, 19.3, 18.7, 14.5; LRMS (ESI): Mass calcd for  $C_{41}H_{58}NO_5Si$   $[M+NH_4]^+$ , 672.41. Found  $[M+NH_4]^+$ , 672.55;  $[\alpha]_D^{20}$  +37.6 ( $CHCl_3$ ,  $c$  0.21).

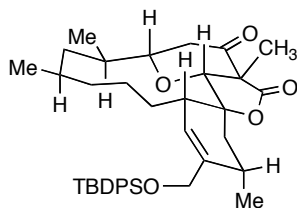

**Tetracycle 25**. To a flame-dried, 3-liter, 2-neck round-bottom flask fitted with a reflux condenser and a stir bar containing a solution of diene **24** (69 mg, 0.11 mmol) in  $CH_2Cl_2$

(1.6 L) was added a freshly prepared solution of Grubbs 2<sup>nd</sup> Generation catalyst (39 mg, 45  $\mu\text{mol}$ ) in  $\text{CH}_2\text{Cl}_2$  (5 mL) by cannula. The solution was heated at reflux for 24 h, cooled to room temperature, stirred while exposed to air for 24 h and concentrated (bath  $<25\text{ }^\circ\text{C}$ ). The residue was filtered through  $\text{SiO}_2$  (eluting with 60% EtOAc/hexanes), concentrated in a flame-dried, round-bottom flask and dissolved in EtOAc (12 mL). The solution was charged with  $\text{PtO}_2$  (70 mg, 0.30 mmol) and the flask was fitted with a balloon filled with  $\text{H}_2$  gas. The reaction mixture was stirred vigorously for 1.5 h, filtered through Celite and concentrated. The residue was purified with 10% EtOAc/hexanes to afford tetracycle **25** (43 mg, 65%) as a colorless oil. Analytical data: IR (film) 2958, 1785, 1742, 1718, 1458, 1373, 1273, 1254, 1112, 704  $\text{cm}^{-1}$ ;  $^1\text{H}$  NMR (500 MHz;  $\text{CDCl}_3$ ):  $\delta$  7.67 (ddd,  $J = 7.7, 4.1, 1.8$  Hz, 4H), 7.42-7.36 (m, 6H), 5.66 (dd,  $J = 5.4, 1.6$  Hz, 1H), 4.36 (s, 1H), 4.08 (s, 2H), 3.58 (ddd,  $J = 10.9, 9.7, 3.8$  Hz, 1H), 2.80 (dd,  $J = 18.2, 3.9$  Hz, 1H), 2.46-2.39 (m, 2H), 2.23-2.20 (m, 1H), 1.84 (dt,  $J = 12.1, 6.4$  Hz, 1H), 1.74-1.71 (m, 1H), 1.69 (s, 3H), 1.64-1.50 (m, 6H), 1.40-1.35 (m, 1H), 1.31-1.22 (m, 3H), 1.04 (s, 9H), 0.91 (d,  $J = 7.0$  Hz, 3H), 0.89 (s, 3H), 0.87 (d,  $J = 7.0$  Hz, 3H);  $^{13}\text{C}$  NMR (125 MHz;  $\text{CDCl}_3$ ):  $\delta$  203.0, 171.9, 138.4, 135.54, 135.46, 133.72, 133.63, 129.57, 129.51, 127.67, 127.59, 123.2, 86.1, 84.8, 82.5, 64.9, 54.1, 45.4, 43.2, 41.9, 38.6, 37.9, 34.18, 34.04, 30.6, 28.3, 26.8, 24.6, 24.1, 23.6, 19.3, 18.8, 18.0; LRMS (ESI): Mass calcd for  $\text{C}_{39}\text{H}_{56}\text{NO}_5\text{Si}$   $[\text{M}+\text{NH}_4]^+$ , 646.39. Found  $[\text{M}+\text{NH}_4]^+$ , 646.56;  $[\alpha]_{\text{D}}^{20} +13.3$  ( $\text{CHCl}_3$ ,  $c$  0.22).

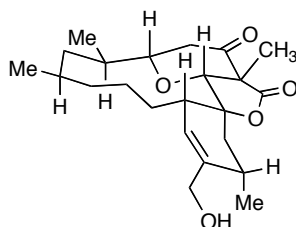

**Allylic alcohol S13.** To a plastic vial with stir bar containing a solution of silyl ether **25** (47 mg, 0.075 mmol) in THF (10 mL) was added HF·pyr (0.26 mL, 3.0 mmol). The solution was stirred for 48 h and carefully quenched with saturated aqueous  $\text{NaHCO}_3$  (50 mL). The aqueous layer was extracted with EtOAc (3x). The combined organic layers were dried over  $\text{Na}_2\text{SO}_4$  and concentrated. The residue was purified by flash column chromatography (20% to 40% EtOAc/hexanes) to afford allylic alcohol **S13** (30 mg, >99%) as a colorless oil. Analytical data: 3412, 2954, 1782, 1719, 1457, 1234, 1110, 756  $\text{cm}^{-1}$ ;  $^1\text{H}$  NMR (500 MHz;  $\text{CDCl}_3$ ):  $\delta$  5.59 (dd,  $J = 5.2, 1.5$  Hz, 1H), 4.35 (s, 1H), 4.10 (dd,  $J = 13.4, 1.0$  Hz, 1H), 4.01 (d,  $J = 13.4$  Hz, 1H), 3.57 (ddd,  $J = 10.9, 9.7, 3.8$  Hz, 1H), 2.80 (dd,  $J = 18.2, 3.9$  Hz, 1H), 2.52-2.47 (m, 1H), 2.43 (dd,  $J = 18.2, 11.1$  Hz, 1H), 2.20 (dd,  $J = 10.3, 5.4$  Hz, 1H), 1.85-1.80 (m, 1H), 1.72 (dd,  $J = 14.3, 11.0$  Hz, 1H), 1.68 (s, 3H), 1.65-1.49 (m, 5H), 1.39-1.19 (m, 5H), 1.03 (d,  $J = 7.1$  Hz, 3H), 0.88 (d,  $J = 7.0$  Hz, 3H), 0.87 (d,  $J = 7.1$  Hz, 3H);  $^{13}\text{C}$  NMR (125 MHz;  $\text{CDCl}_3$ ):  $\delta$  202.8, 171.9, 139.6, 124.7, 86.0, 84.7, 82.6, 64.7, 54.0, 45.3, 43.2, 42.0, 38.5, 37.9, 34.00, 33.92, 30.6, 28.1, 24.5, 24.0, 23.6, 18.6, 17.9; LRMS (ESI): Mass calcd for  $\text{C}_{23}\text{H}_{38}\text{NO}_5$   $[\text{M}+\text{NH}_4]^+$ , 408.27. Found  $[\text{M}+\text{NH}_4]^+$ , 408.50;  $[\alpha]_{\text{D}}^{20} -1.7$  ( $\text{CHCl}_3$ ,  $c$  0.38).

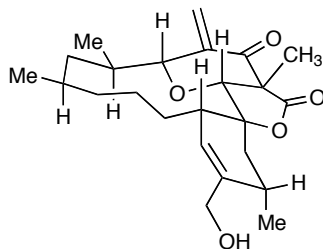

**Enone S14.** To a flame-dried 1 dram vial containing a  $-78$  °C solution of allylic alcohol **S13** (8.3 mg, 0.021 mmol) in THF (1.0 mL) was added a freshly prepared solution of lithium bis(trimethylsilyl)amide (0.13 mL, 0.065 mmol, 0.5 M in THF) dropwise by syringe. The solution was stirred at  $-78$  °C for 1 h and then charged with dimethylmethylideneammonium iodide (130 mg, 0.7 mmol) in one portion. The reaction mixture was warmed to 0 °C for 10 min and then stirred at room temperature for 3.5 h. The reaction mixture was quenched with EtOAc (1 mL) and saturated aqueous  $\text{NH}_4\text{Cl}$  (1 mL). The mixture was diluted with water and  $\text{CH}_2\text{Cl}_2$ , filtered through a Biotage ISOLUTE® phase separator and the organic filtrate was concentrated. The residue was purified by flash column chromatography (20% to 30% EtOAc/hexanes) to afford enone **S14** (8.0 mg, 95%) as a colorless oil. Analytical data: IR (film) 3399, 2953, 1782, 1708, 1627, 1457, 1261, 1130, 1027, 965  $\text{cm}^{-1}$ ;  $^1\text{H}$  NMR (500 MHz;  $\text{CDCl}_3$ ):  $\delta$  6.43 (s, 1H), 5.66 (d,  $J = 1.4$  Hz, 1H), 5.59 (d,  $J = 4.7$  Hz, 1H), 4.43 (s, 1H), 4.08 (d,  $J = 13.3$  Hz, 1H), 4.00 (d,  $J = 13.3$  Hz, 1H), 3.90 (d,  $J = 9.5$  Hz, 1H), 2.48 (dt,  $J = 11.2, 5.9$  Hz, 1H), 2.19 (dd,  $J = 10.0, 5.4$  Hz, 1H), 2.00-1.94 (m, 1H), 1.80 (dt,  $J = 12.1, 6.3$  Hz, 1H), 1.70 (s, 3 H and dd,  $J = 14.5, 10.9$  Hz, 1H), 1.61-1.51 (m, 4H), 1.27-1.17 (m, 5H), 1.07 (d,  $J = 6.6$  Hz, 3H), 1.00 (d,  $J = 7.0$  Hz, 3H), 0.96 (dd,  $J = 14.2, 7.6$  Hz, 1H), 0.89 (d,  $J = 6.8$  Hz, 3H);  $^{13}\text{C}$  NMR (125 MHz;  $\text{CDCl}_3$ ):  $\delta$  192.3, 171.8, 142.1, 139.5, 124.8, 121.5, 86.0, 84.2, 82.4, 64.7, 52.2, 45.1, 41.8, 37.8, 34.6, 34.01, 33.95, 30.1, 28.2, 25.9, 23.7, 23.4, 20.6, 18.7; LRMS (ESI): Mass calcd for  $\text{C}_{24}\text{H}_{38}\text{NO}_5$   $[\text{M}+\text{NH}_4]^+$ , 420.28. Found  $[\text{M}+\text{NH}_4]^+$ , 420.42;  $[\alpha]_{\text{D}}^{20} -37.6$  ( $\text{CHCl}_3$ ,  $c$  0.55).

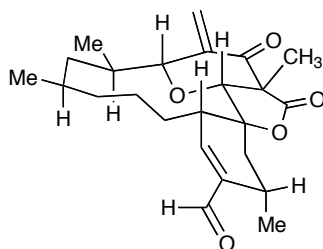

**Aldehyde 26.** To a 1-dram vial containing a solution of enone **S14** (5 mg, 0.012 mmol) in  $\text{CH}_2\text{Cl}_2$  (1.2 mL) was added  $\text{NaHCO}_3$  (10 mg, 0.11 mmol) followed by Dess-Martin periodinane (10.6 mg, 0.025 mmol). The reaction mixture was stirred at room temperature for 1 h and quenched with saturated aqueous  $\text{NaHCO}_3$  (1 mL) and saturated aqueous  $\text{Na}_2\text{S}_2\text{O}_3$  (1 mL) and stirred until the two layers were clear. The mixture was filtered through a Biotage ISOLUTE® phase separator and the organic filtrate was concentrated. The residue was purified by flash column chromatography (10% to 20% EtOAc/hexanes) to afford aldehyde **26** (4 mg, 83%) as a white solid. Analytical data: IR (film) 2951, 2918, 2720, 1786, 1686, 1628, 1457, 1375, 1252, 1128, 1027, 974  $\text{cm}^{-1}$ ;  $^1\text{H}$

NMR (500 MHz; CDCl<sub>3</sub>):  $\delta$  9.35 (s, 1H), 6.58 (dd,  $J$  = 5.8, 1.5 Hz, 1H), 6.46 (s, 1H), 5.68 (d,  $J$  = 1.1 Hz, 1H), 4.46 (s, 1H), 3.93 (d,  $J$  = 9.5 Hz, 1H), 2.73-2.68 (m, 1H), 2.48-2.44 (m, 1H), 2.02-1.97 (m, 1H), 1.79 (dt,  $J$  = 12.2, 6.3 Hz, 1H), 1.74-1.66 (m, 2H and s, 3H), 1.55 (dd,  $J$  = 14.1, 9.5 Hz, 1H), 1.38 (ddd,  $J$  = 15.1, 6.4, 1.8 Hz, 1H), 1.33-1.22 (m, 5H), 1.14 (d,  $J$  = 6.9 Hz, 3H), 1.08 (d,  $J$  = 6.6 Hz, 3H), 0.99 (dd,  $J$  = 14.2, 7.7 Hz, 1H), 0.91 (d,  $J$  = 6.8 Hz, 3H); <sup>13</sup>C NMR (125 MHz; CDCl<sub>3</sub>):  $\delta$  193.3, 191.8, 171.2, 150.6, 143.2, 141.8, 121.8, 84.9, 83.8, 82.4, 52.2, 45.0, 42.8, 37.6, 34.6, 33.6, 32.3, 30.2, 25.97, 25.77, 23.59, 23.49, 20.5, 19.2; LRMS (ESI): Mass calcd for C<sub>24</sub>H<sub>36</sub>NO<sub>5</sub> [M+NH<sub>4</sub>]<sup>+</sup>, 418.26. Found [M+NH<sub>4</sub>]<sup>+</sup>, 418.45;  $[\alpha]_D^{20}$  -26.3 (CHCl<sub>3</sub>,  $c$  0.4).

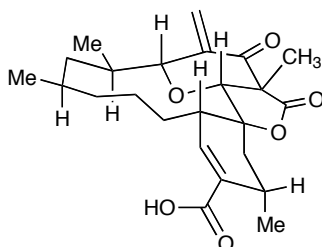

**(-)-Okilactomycin (1).** To a 1-dram vial containing enone **26** (4 mg, 0.01 mmol) in THF (0.5 mL) was added 2-methyl-2-butene (42  $\mu$ L, 0.4 mmol), and *t*-butanol (0.5 mL). To the reaction mixture was added a freshly prepared solution of NaH<sub>2</sub>PO<sub>4</sub> (11.8 mg, 0.085 mmol) and NaClO<sub>2</sub> (6.9 mg, 0.075 mmol) in water (0.17 mL). The reaction mixture was stirred at room temperature for 1 h, quenched with 1 N HCl, and diluted with CH<sub>2</sub>Cl<sub>2</sub>. The mixture was filtered through a Biotage ISOLUTE® phase separator and the organic filtrate was concentrated. The residue was purified by preparative HPLC (Phenomenex Gemini NX 5  $\mu$ m C-18 110A 10 mm x 250 mm column, 42% to 77% CH<sub>3</sub>CN w/ 0.5% formic acid/water w/ 0.5% formic acid at 8 mL/min over 14 min) to afford (-)-okilactomycin **1** (2 mg, 50%) as a white solid. Analytical data: IR (film) 2925, 2862, 1781, 1709, 1625, 1458, 1262, 1187, 974 cm<sup>-1</sup>; <sup>1</sup>H NMR (500 MHz; acetone-d<sub>6</sub>):  $\delta$  6.76 (dd,  $J$  = 6.0, 2.0 Hz, 1H), 6.31 (d,  $J$  = 0.8 Hz, 1H), 5.76 (d,  $J$  = 1.4 Hz, 1H), 4.75 (s, 1H), 4.23 (d,  $J$  = 9.5 Hz, 1H), 2.65-2.59 (m, 1H), 2.44-2.41 (m, 1H), 2.01 (ddd,  $J$  = 12.9, 6.4, 3.1 Hz, 1H), 1.93-1.78 (m, 3H), 1.72 (dd,  $J$  = 13.8, 9.3 Hz, 1H), 1.69 (s, 3H), 1.67-1.61 (m, 2H), 1.38-1.28 (m, 2H), 1.25-1.19 (m, 1H), 1.11-1.09 (m, 6H), 1.06-1.04 (m, 1H), 0.93 (dd,  $J$  = 14.0, 7.6 Hz, 1H), 0.89 (d,  $J$  = 6.8 Hz, 3H); <sup>13</sup>C NMR (125 MHz; acetone-d<sub>6</sub>):  $\delta$  193.4, 171.8, 168.1, 144.0, 140.2, 134.4, 121.0, 85.5, 83.8, 82.7, 53.2, 45.6, 42.7, 38.6, 35.5, 34.6, 33.3, 31.0, 28.4, 25.5, 24.01, 23.88, 20.70, 20.50; HRMS (ESI): Mass calcd for C<sub>24</sub>H<sub>31</sub>O<sub>6</sub> [M-H]<sup>-</sup>, 415.2126. Found [M-H]<sup>-</sup>, 415.2122;  $[\alpha]_D^{20}$  -20 ( $c$  0.04, MeOH). Literature value for (+)-okilactomycin:  $[\alpha]_D^{20}$  (+34,  $c$  1.0, MeOH).<sup>4</sup>

## Spectral Comparisons

*<sup>1</sup>H NMR spectroscopy chemical shifts of okilactomycin<sup>3</sup>*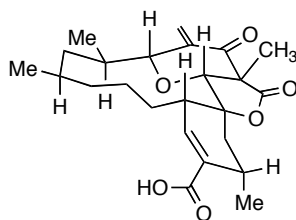

| Natural (+)-Okilactomycin<br>$\delta$ (ppm in acetone-d <sub>6</sub> ) | Synthetic (-)-Okilactomycin<br>$\delta$ (ppm in acetone-d <sub>6</sub> ) |
|------------------------------------------------------------------------|--------------------------------------------------------------------------|
| 6.76 (dd, $J = 6.0, 1.9$ Hz, 1H)                                       | 6.76 (dd, $J = 6.0, 2.0$ Hz, 1H)                                         |
| 6.32 (d, $J = 0.5$ Hz, 1H)                                             | 6.31 (d, $J = 0.8$ Hz, 1H)                                               |
| 5.76 (d, $J = 1.3$ Hz, 1H)                                             | 5.76 (d, $J = 1.4$ Hz, 1H)                                               |
| 4.75 (s, 1H)                                                           | 4.75 (s, 1H)                                                             |
| 4.23 (d, $J = 9.5$ Hz, 1H)                                             | 4.23 (d, $J = 9.5$ Hz, 1H)                                               |
| 2.65-2.60 (m, 1H)                                                      | 2.65-2.59 (m, 1H)                                                        |
| 2.44-2.41 (m, 1H)                                                      | 2.44-2.41 (m, 1H)                                                        |
| 2.01 (ddd, $J = 12.9, 6.5, 3.2$ Hz, 1H)                                | 2.01 (ddd, $J = 12.9, 6.4, 3.1$ Hz, 1H)                                  |
| 1.91-1.78 (m, 3H)                                                      | 1.93-1.78 (m, 3H)                                                        |
| 1.72 (dd, $J = 14.1, 9.6$ Hz, 1H)                                      | 1.72 (dd, $J = 13.8, 9.3$ Hz, 1H)                                        |
| 1.69 (s, 3H)                                                           | 1.69 (s, 3H)                                                             |
| 1.67-1.62 (m, 2H)                                                      | 1.67-1.61 (m, 2H)                                                        |
| 1.39-1.30 (m, 2H)                                                      | 1.38-1.28 (m, 2H)                                                        |
| 1.25-1.19 (m, 1H)                                                      | 1.25-1.19 (m, 1H)                                                        |
| 1.11-1.09 (m, 6H)                                                      | 1.11-1.09 (m, 6H)                                                        |
| 1.06-1.04 (m, 1H)                                                      | 1.06-1.04 (m, 1H)                                                        |
| 0.93 (dd, $J = 14.1, 7.6$ Hz, 1H)                                      | 0.93 (dd, $J = 14.0, 7.6$ Hz, 1H)                                        |
| 0.89 (d, $J = 6.8$ Hz, 3H)                                             | 0.89 (d, $J = 6.8$ Hz, 3H)                                               |

***<sup>13</sup>C NMR spectroscopy chemical shifts of okilactomycin***

| <b>Natural (+)-Okilactomycin<br/>δ (ppm in acetone-d6)</b> | <b>Synthetic (-)-Okilactomycin<br/>δ (ppm in acetone-d6)</b> |
|------------------------------------------------------------|--------------------------------------------------------------|
| 193.4                                                      | 193.4                                                        |
| 171.8                                                      | 171.8                                                        |
| 168.1                                                      | 168.1                                                        |
| 144.0                                                      | 144.0                                                        |
| 140.1                                                      | 140.2                                                        |
| 134.4                                                      | 134.4                                                        |
| 121.0                                                      | 121.0                                                        |
| 85.5                                                       | 85.5                                                         |
| 83.8                                                       | 83.8                                                         |
| 82.7                                                       | 82.7                                                         |
| 53.2                                                       | 53.2                                                         |
| 45.7                                                       | 45.6                                                         |
| 42.8                                                       | 42.7                                                         |
| 38.6                                                       | 38.6                                                         |
| 35.6                                                       | 35.5                                                         |
| 34.6                                                       | 34.6                                                         |
| 33.3                                                       | 33.3                                                         |
| 31.0                                                       | 31.0                                                         |
| 28.4                                                       | 28.4                                                         |
| 25.5                                                       | 25.5                                                         |
| 24.05                                                      | 24.01                                                        |
| 23.89                                                      | 23.88                                                        |
| 20.71                                                      | 20.70                                                        |
| 20.53                                                      | 20.50                                                        |



### Stereochemical Determination of **10**

The relative stereochemistry of the major diastereomer of **10** was determined by the X-ray diffraction. Recrystallized from slow cooling in hot methanol.

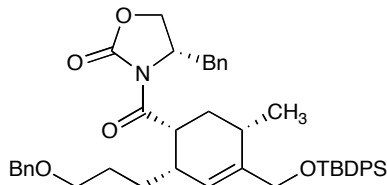

X-ray crystal structure of (*S*)-4-benzyl-3-((1*R*,2*S*,5*S*)-2-(3-(benzyloxy)propyl)-4-((*tert*-butyldiphenylsilyloxy)methyl)-5-methylcyclohex-3-enecarbonyl)oxazolidin-2-one (**10**).

X-ray diffraction was performed at  $-173\text{ }^{\circ}\text{C}$  and raw frame data were processed using SAINT. Molecular structure was solved using direct methods and refined by F2 by full-matrix least-squares techniques. The GOF = 0.973 for 473 variables refined to  $R1 = 0.0637$  for 5034 reflections with  $I > 2\sigma(I)$ . A multi-scan absorption correction (SADABS, Bruker) was applied. Minimum and maximum transmission factors were 0.5801 and 0.9558, respectively. The Flack parameter was refined to 0.01(5). Further information is contained in the CIF file (CCDC 816131).

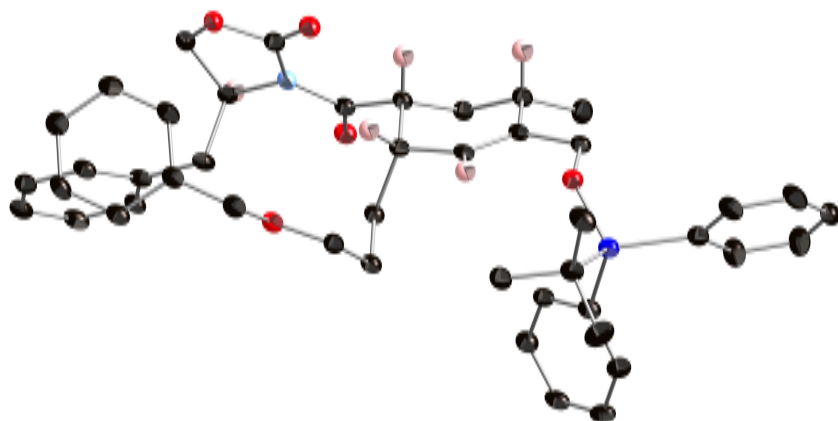

### References

- (1) Pangborn, A. B.; Giardello, M. A.; Grubbs, R. H.; Rosen, R. K.; Timmers, F. J. *Organometallics* **1996**, *15*, 1518-1520.
- (2) Armarego, W. L. F.; Chai, C. L. L. *Purification of Laboratory Chemicals*; 6th ed.; Butterworth-Heinemann, 2009.
- (3) Spectra of authentic (+)-okilactomycin was provided by Dr. Margaret Biddle and Dr. Hironori Harada, Astellas Pharmaceuticals, Private Communication.
- (4) H. S. Imai, K. I. Suzuki, M. Morioka, Y. Numasaki, S. Kadota, K. Nagai, T. Sato, M. Iwanami, T. Saito, *J. Antibiot.* **1987**, *40*, 1475-1482.

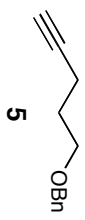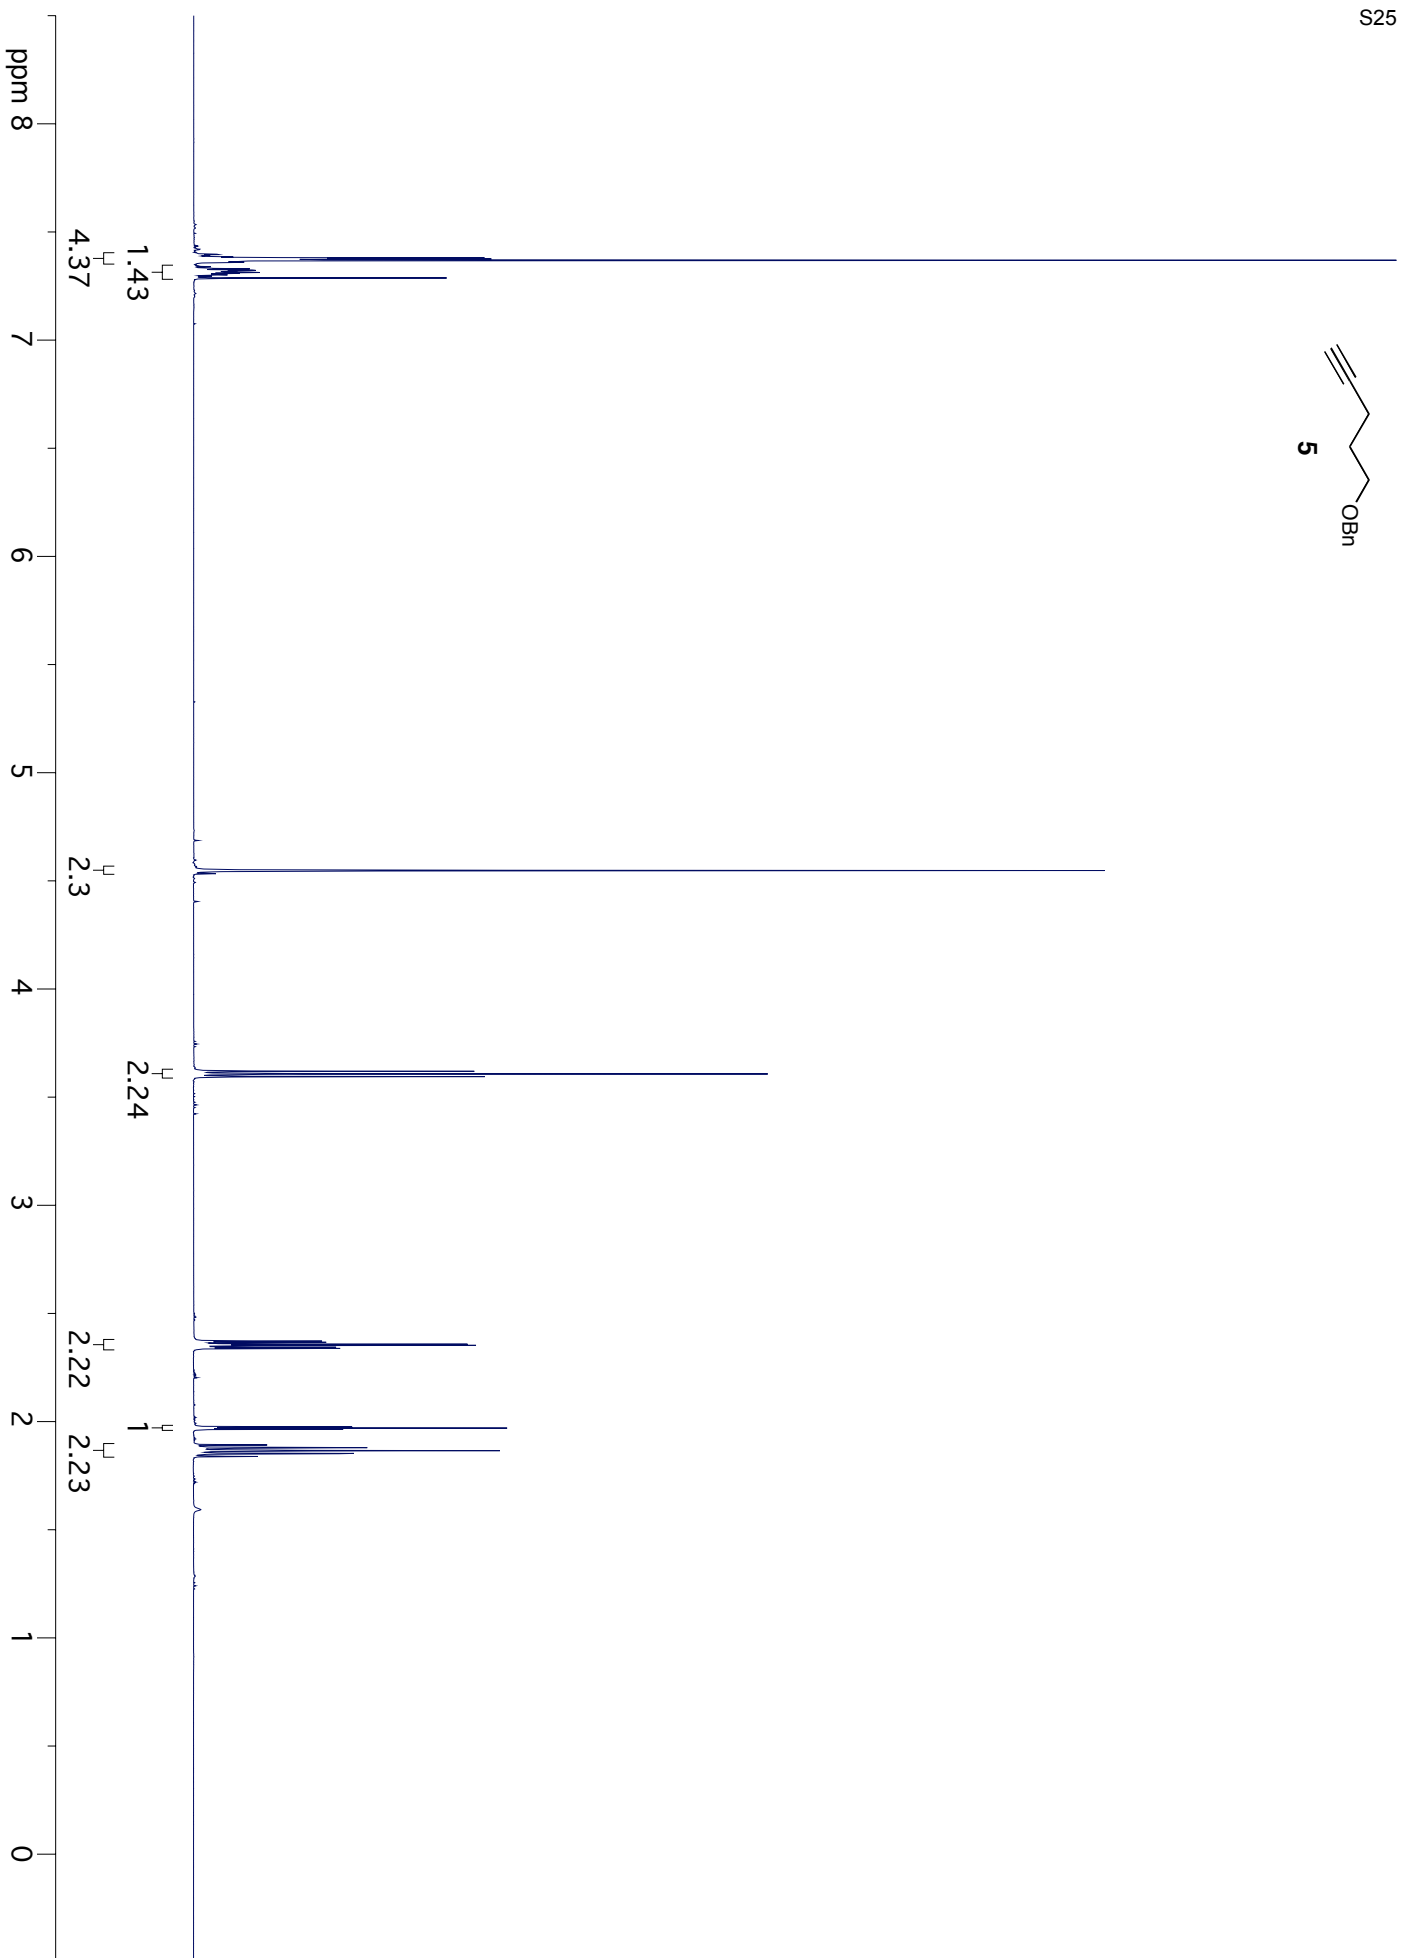

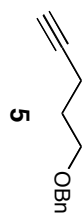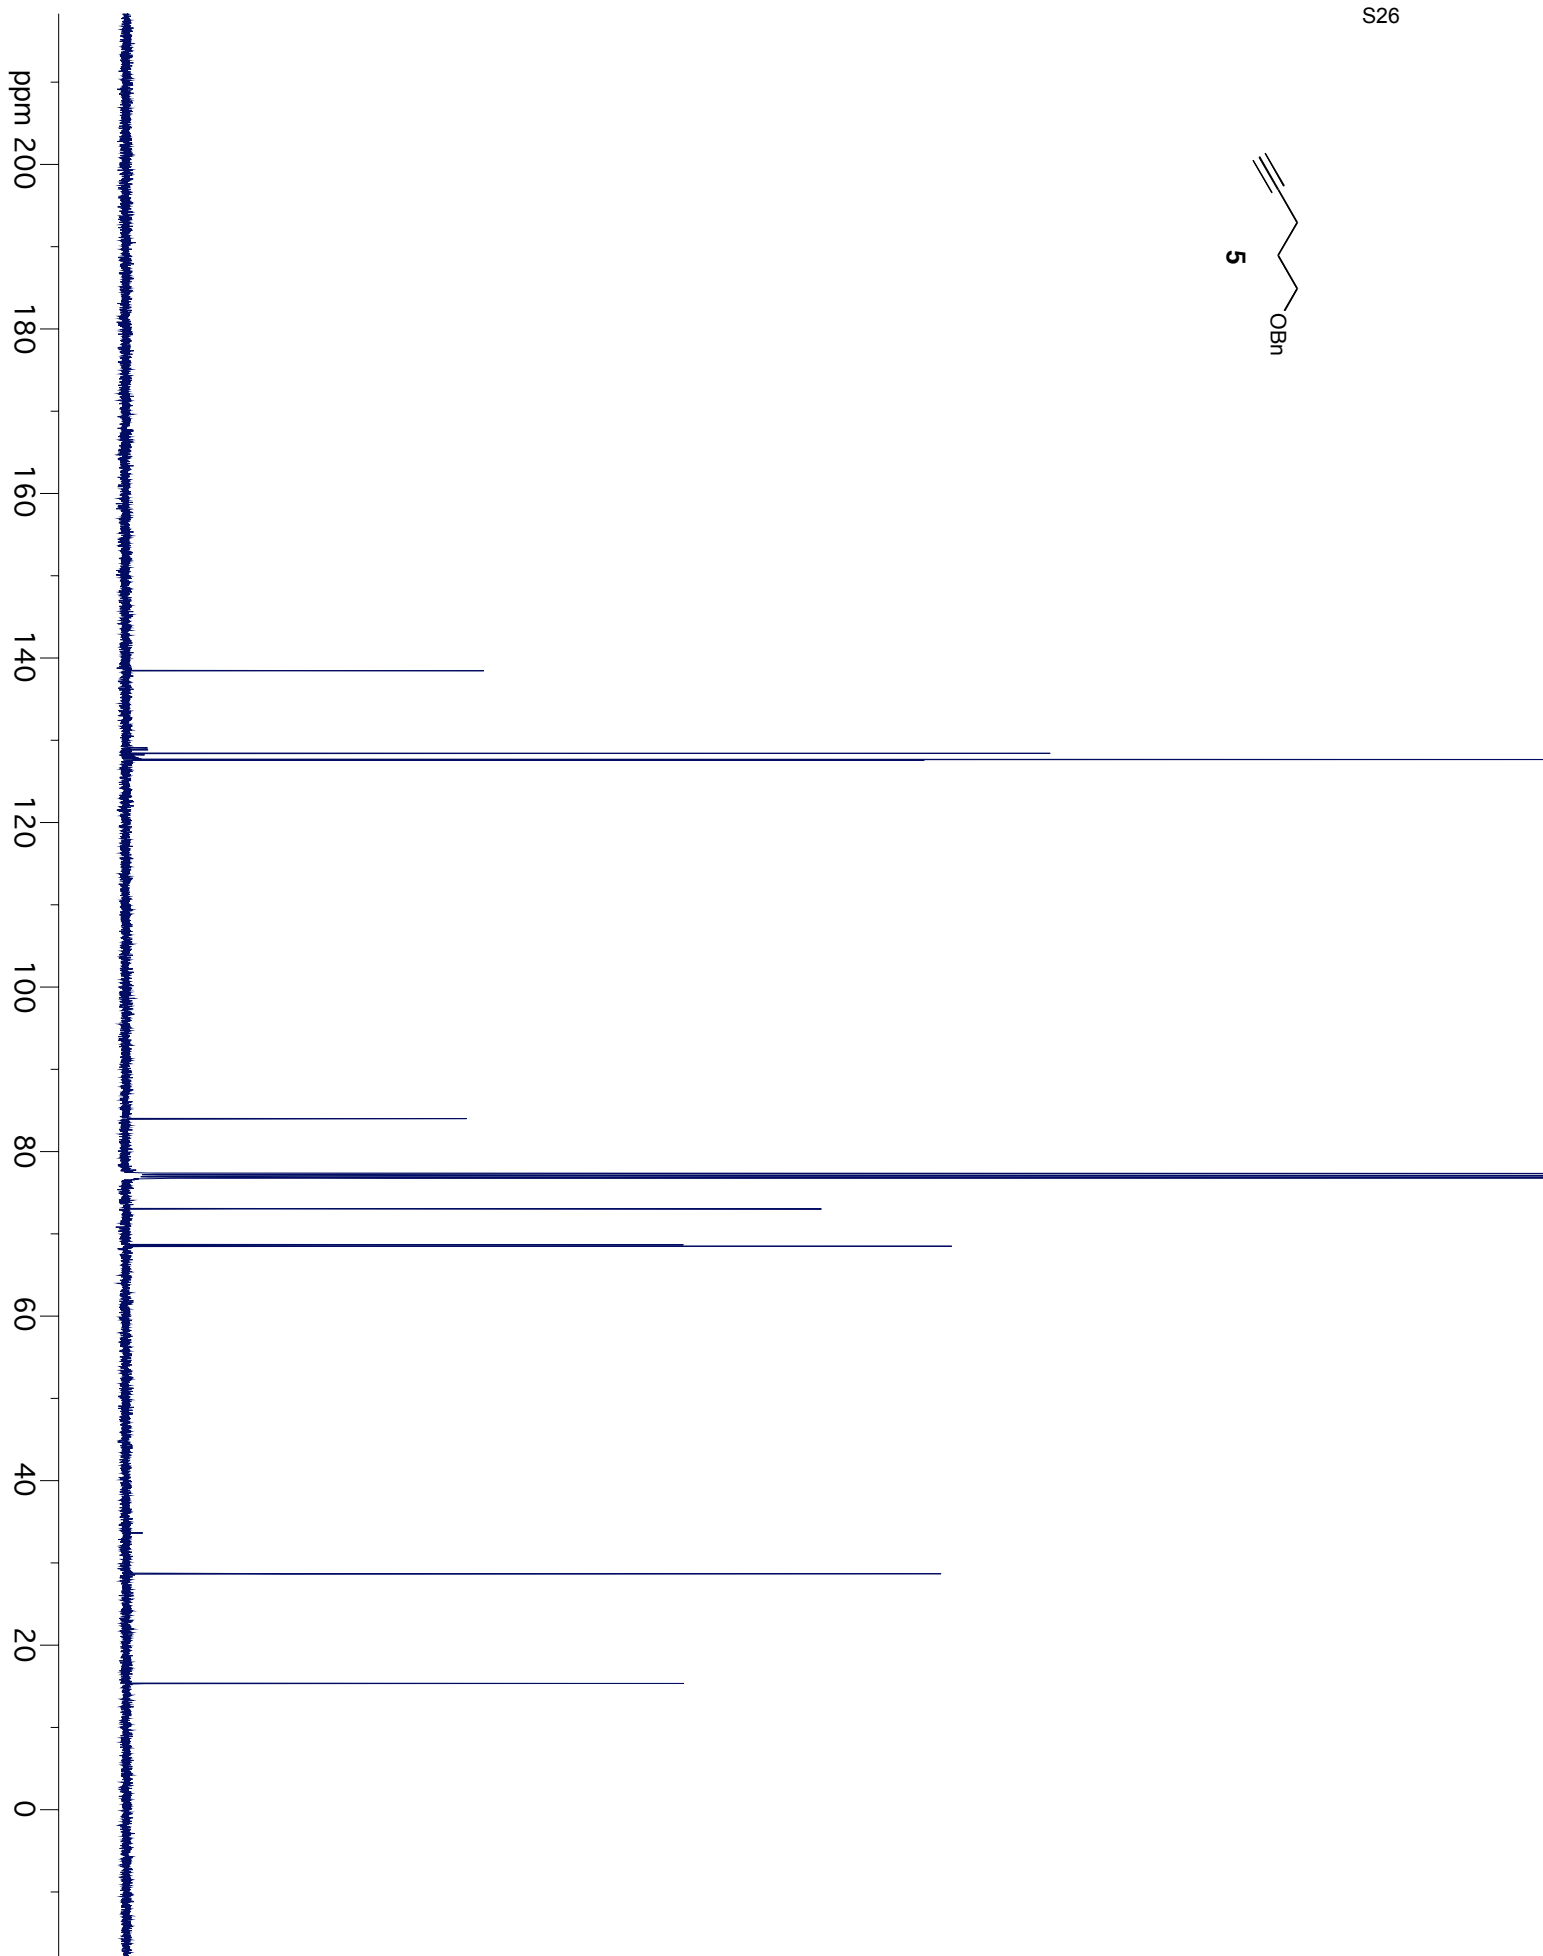

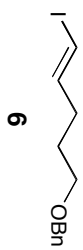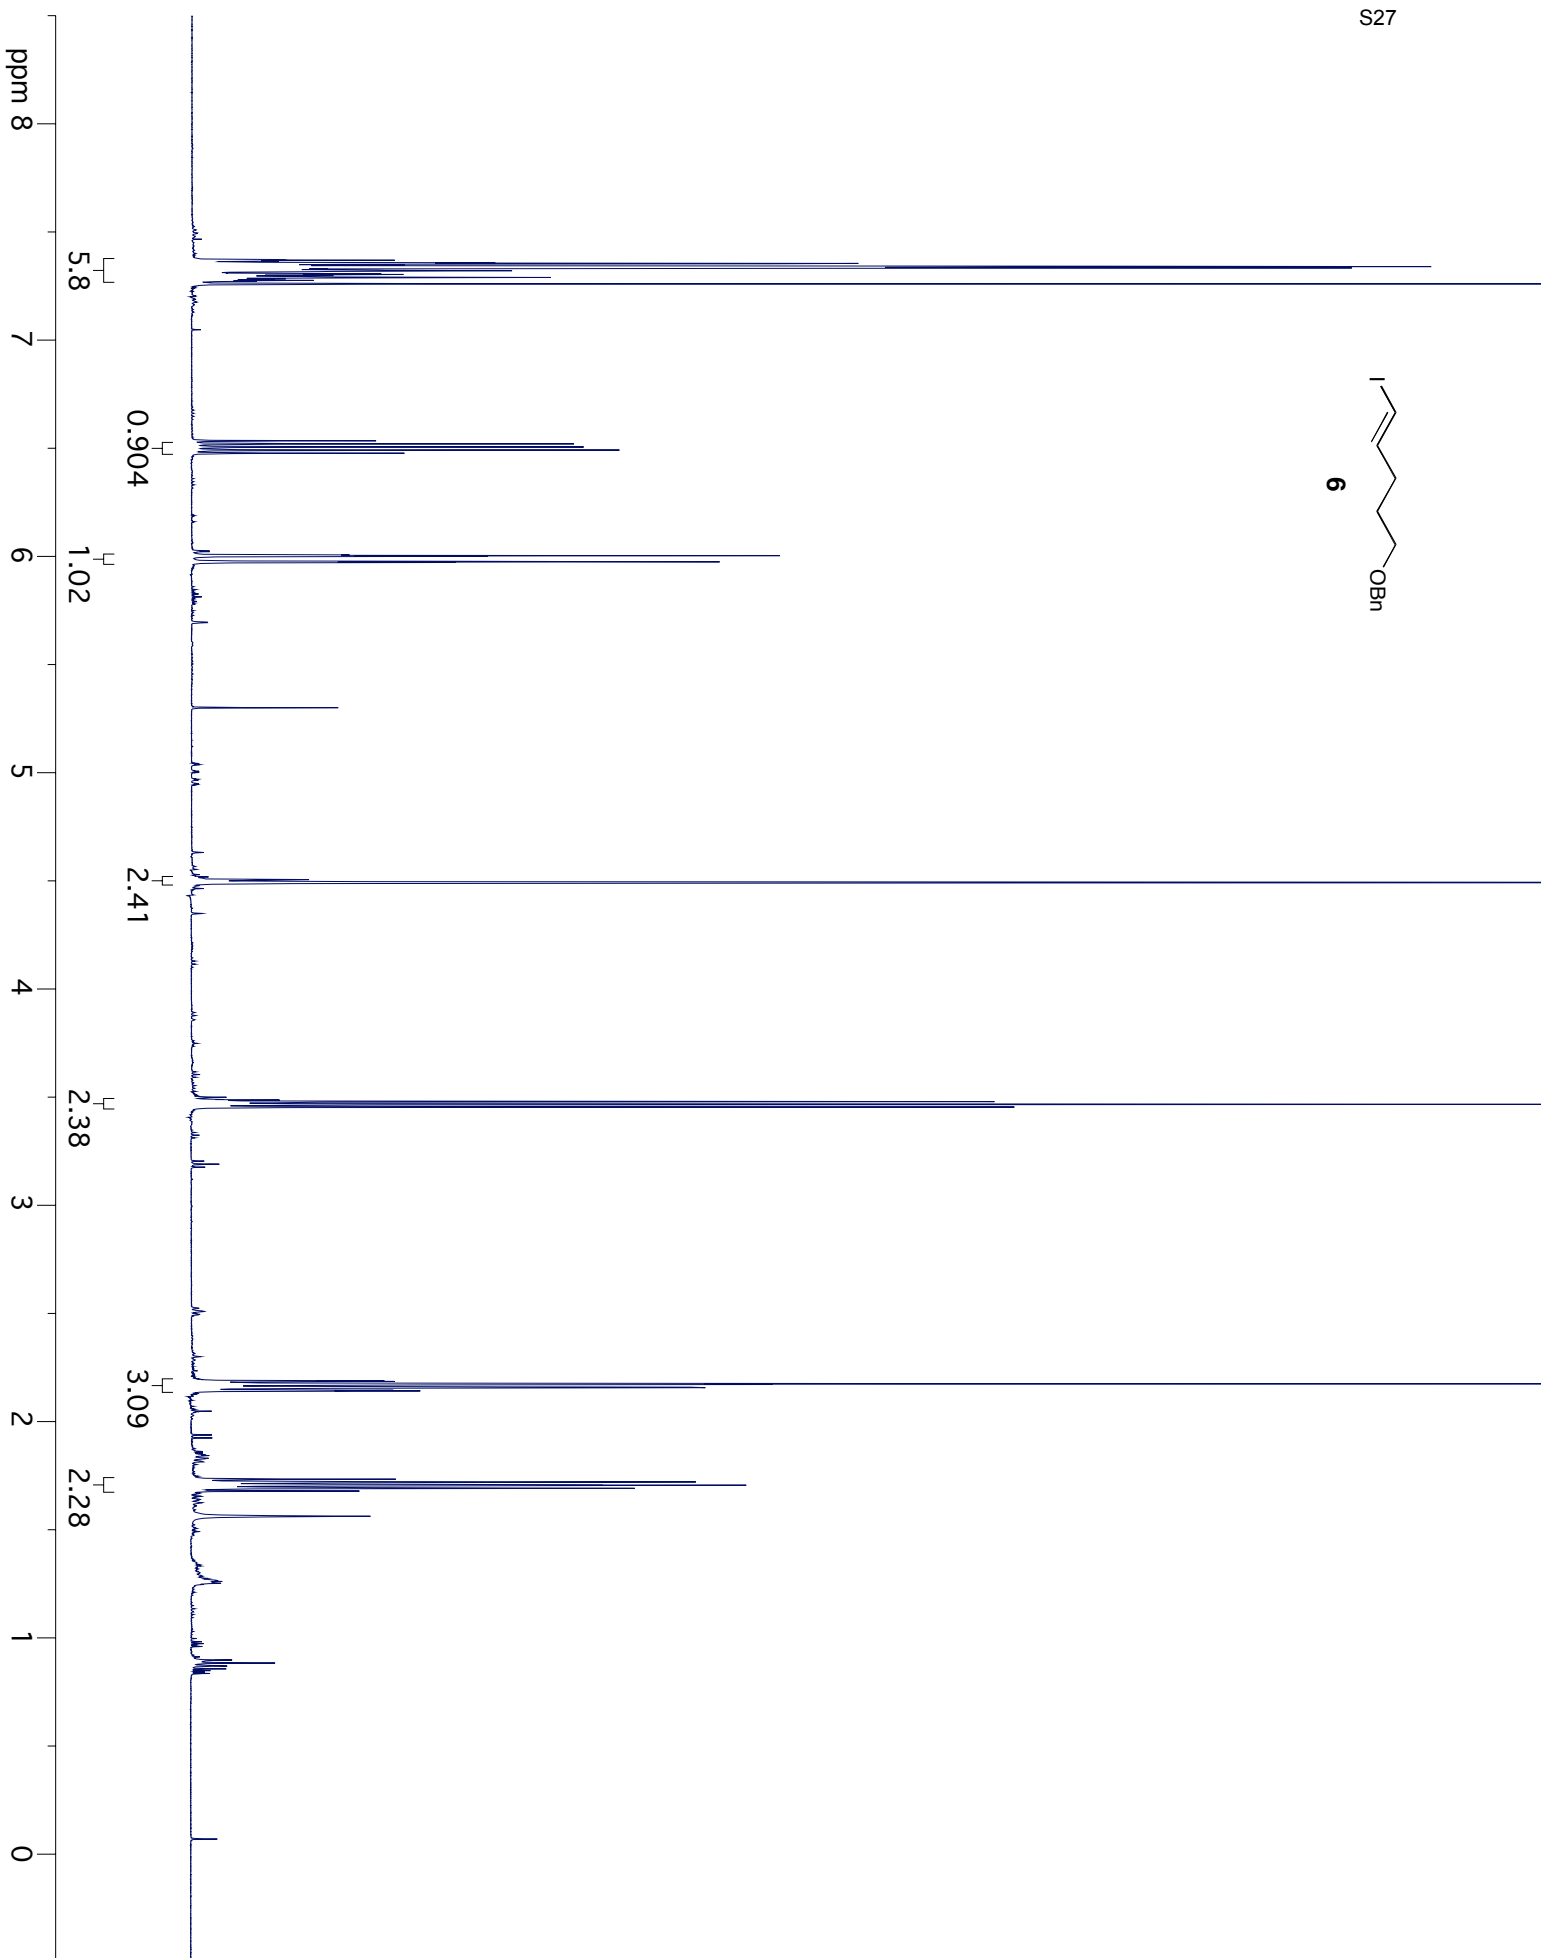

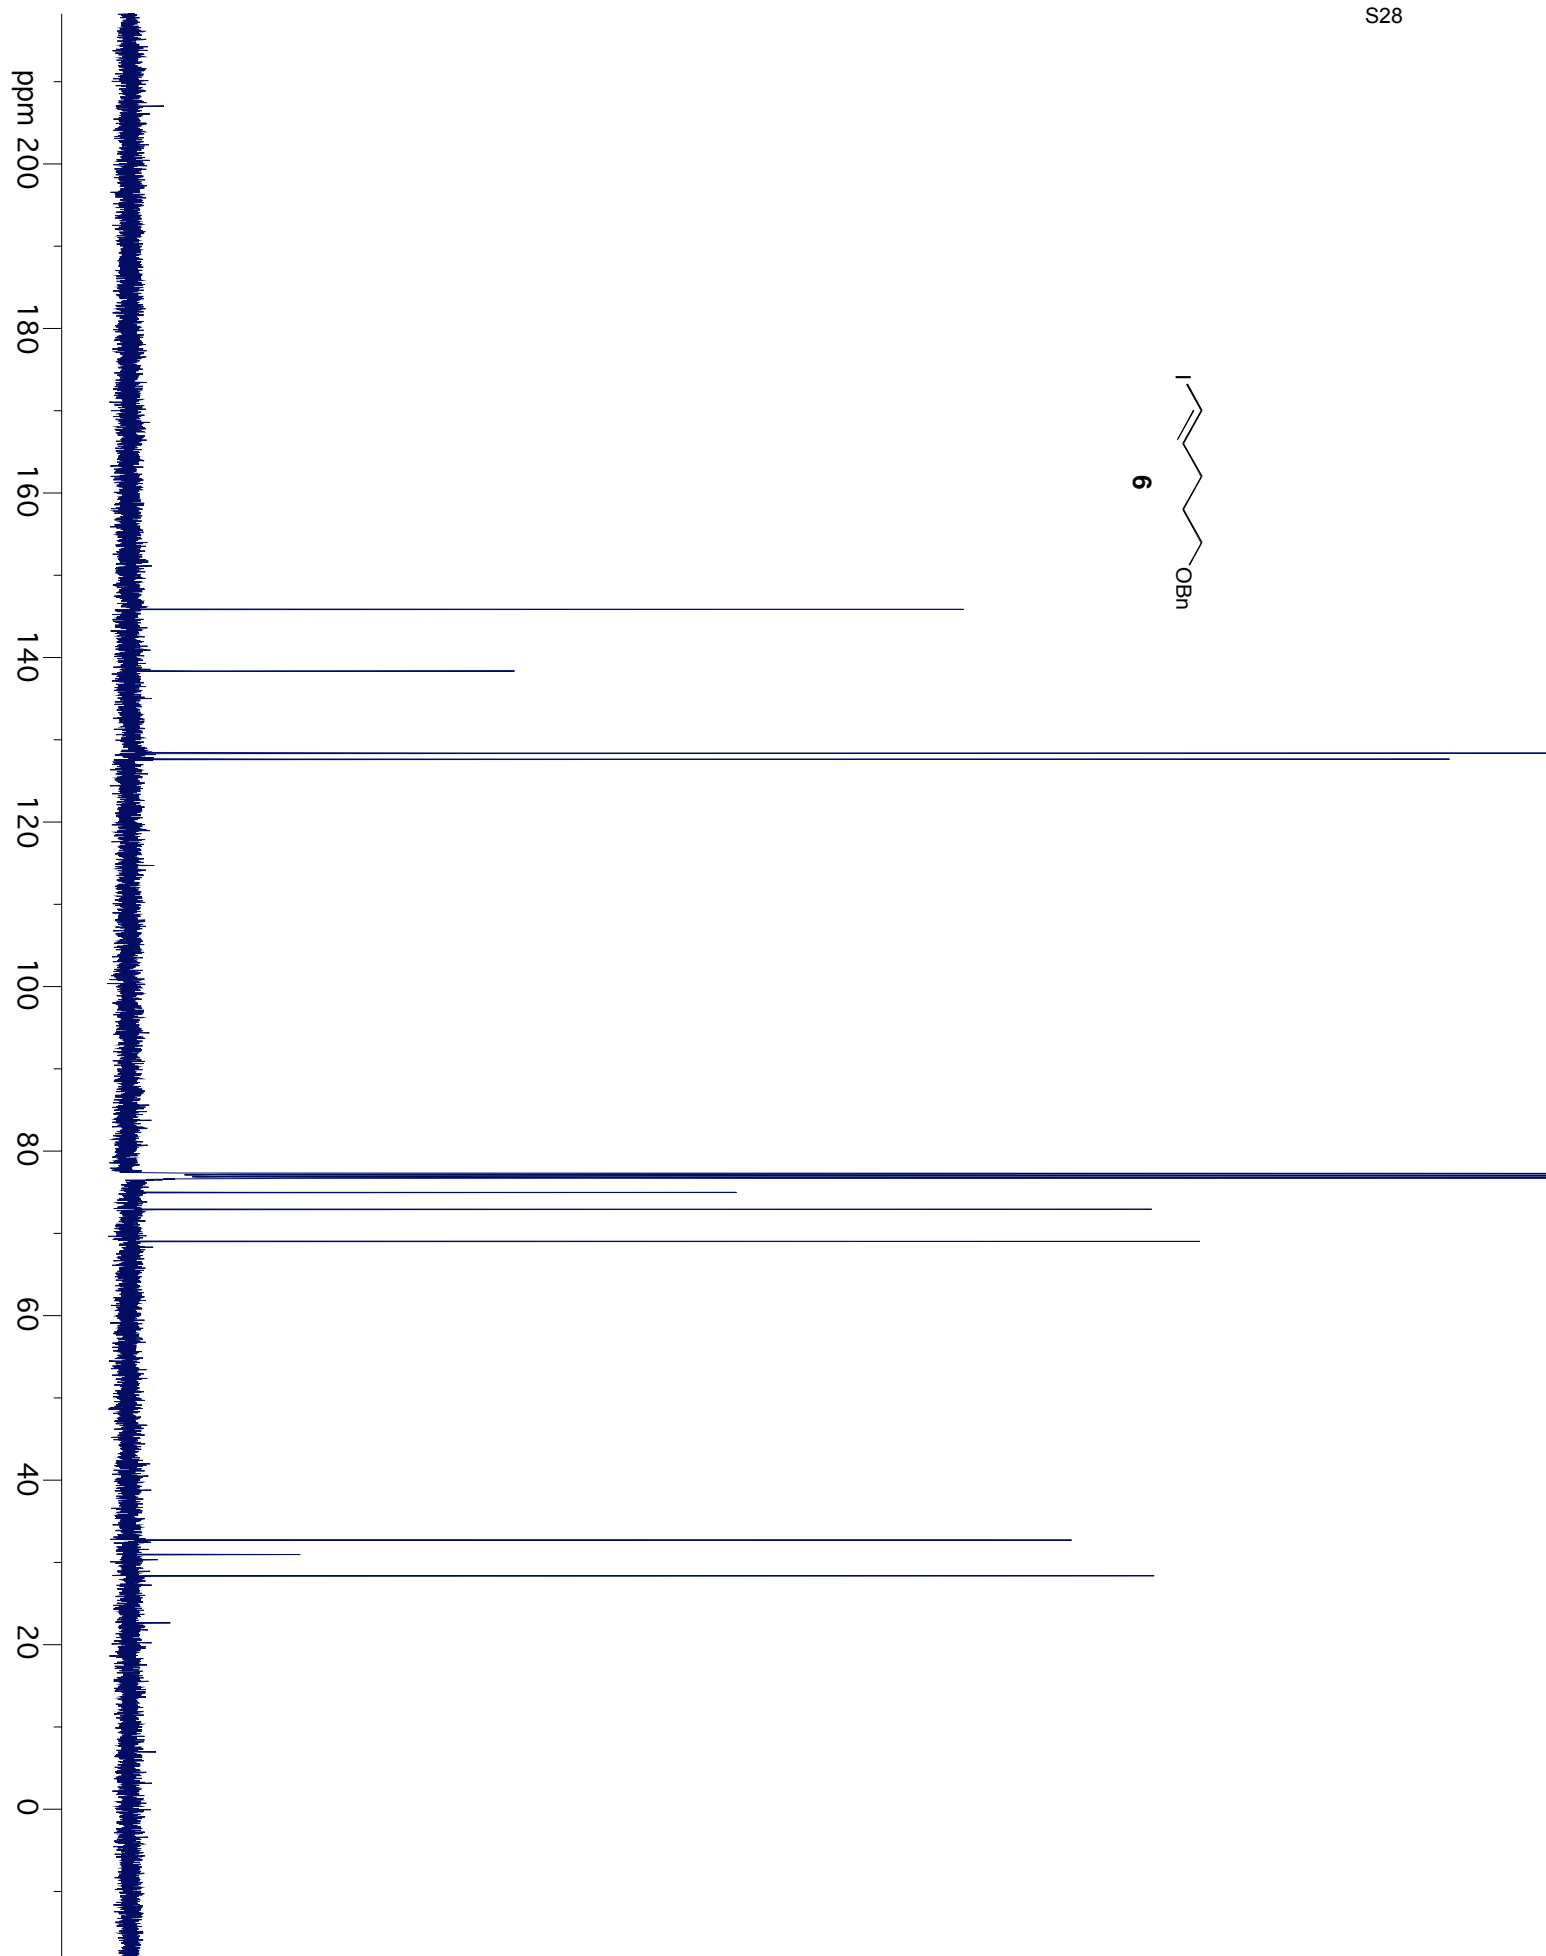



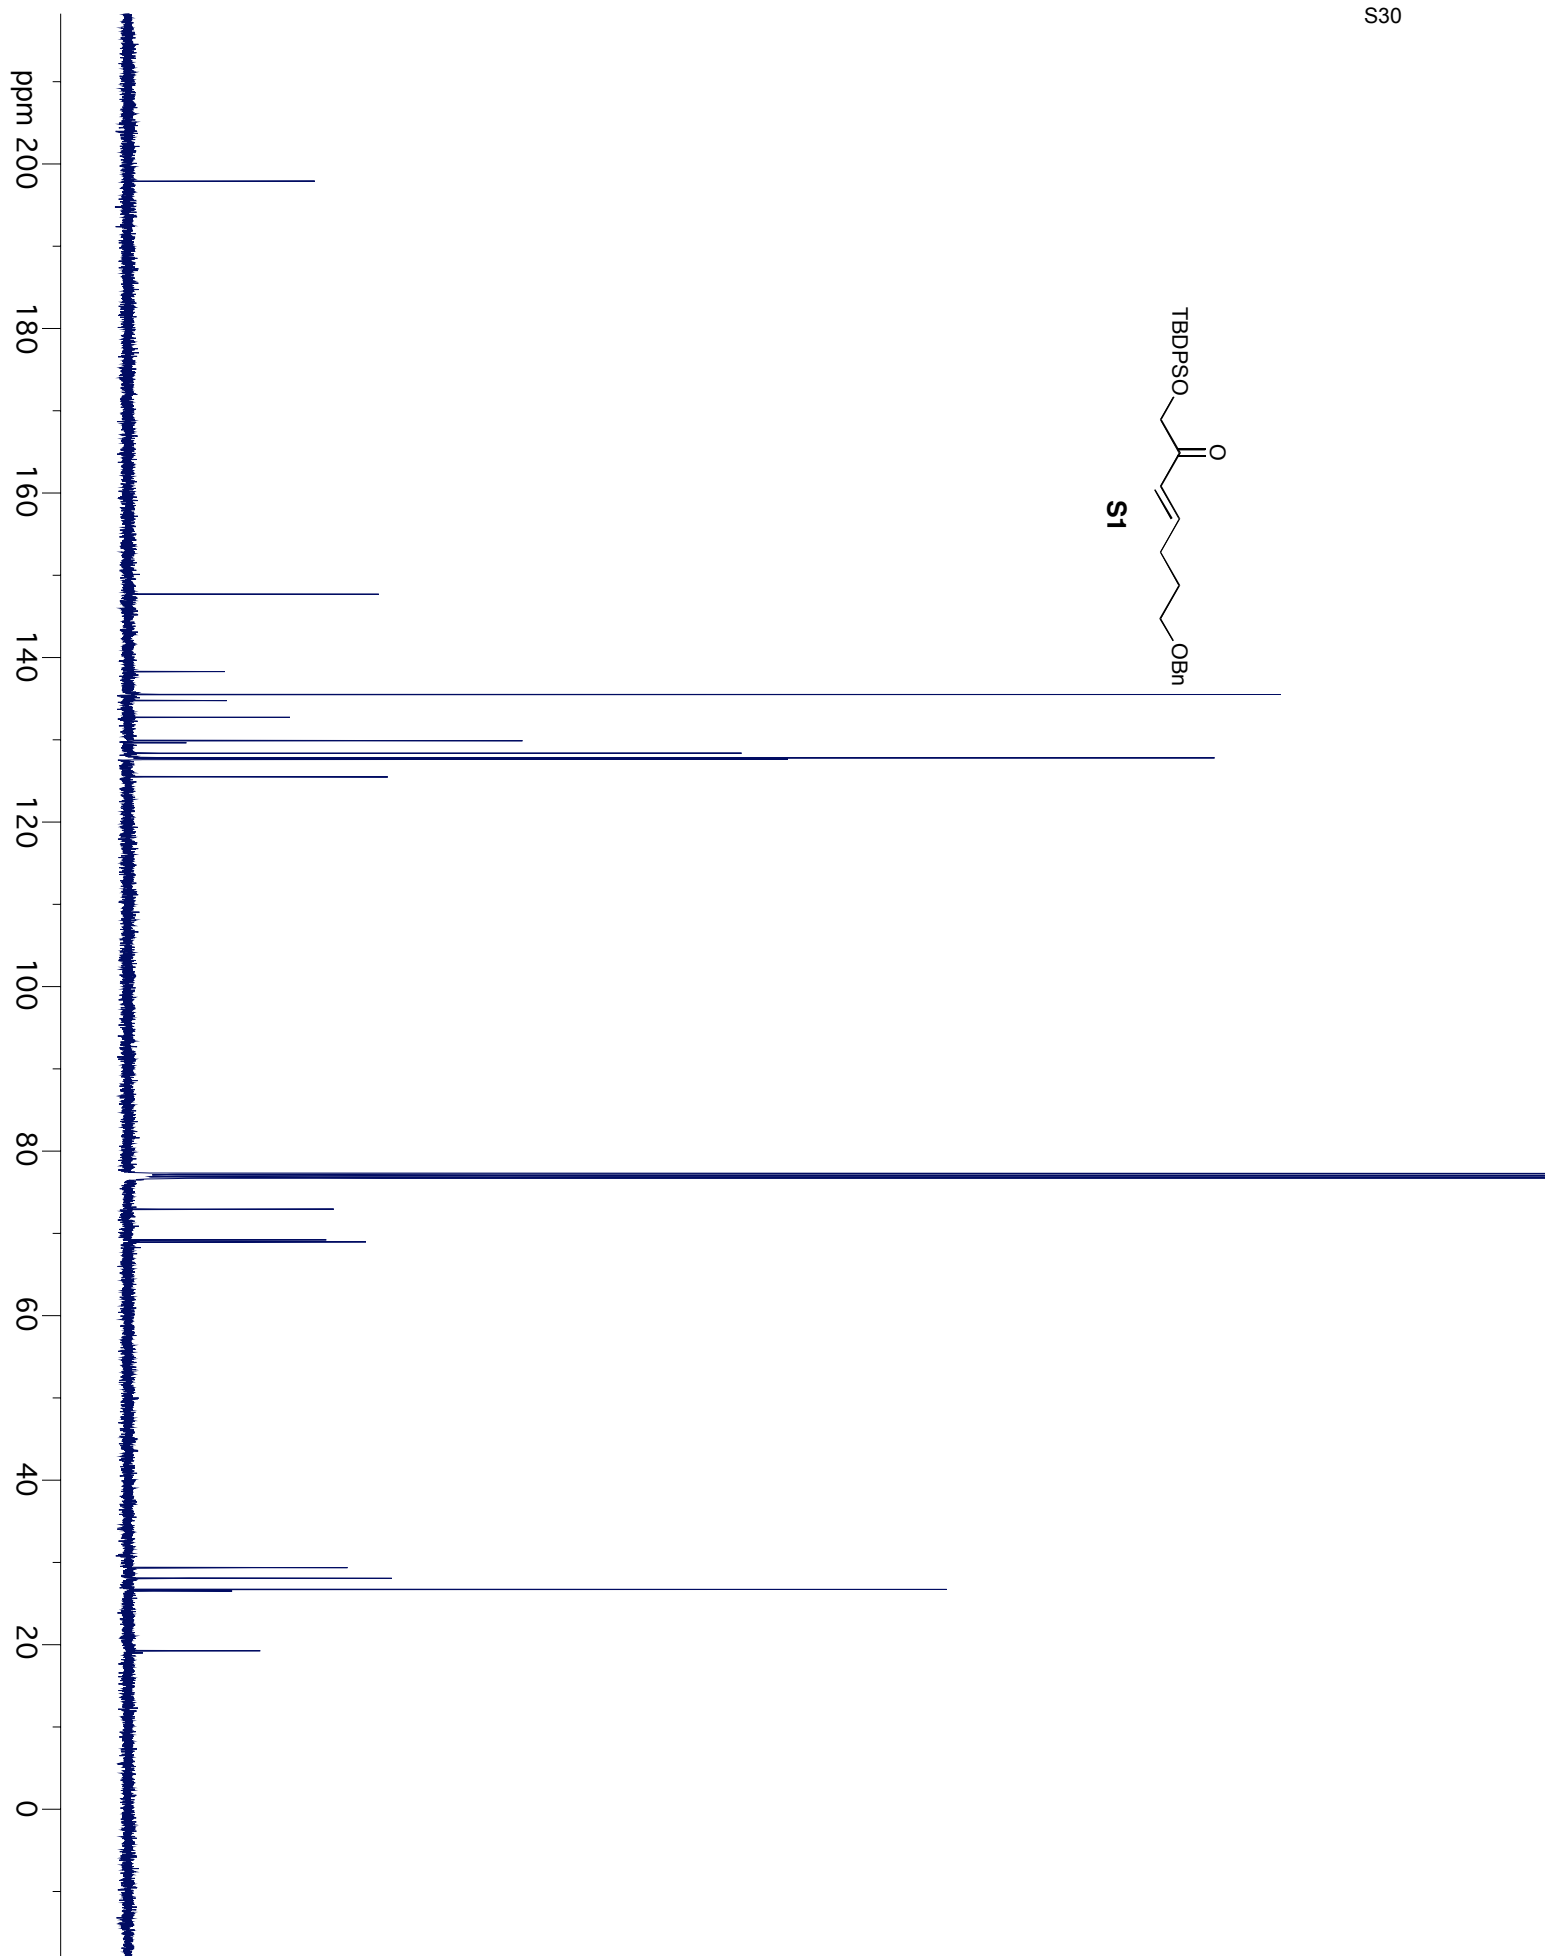

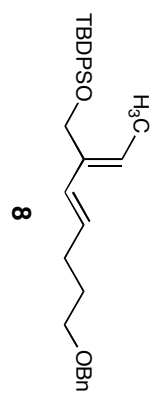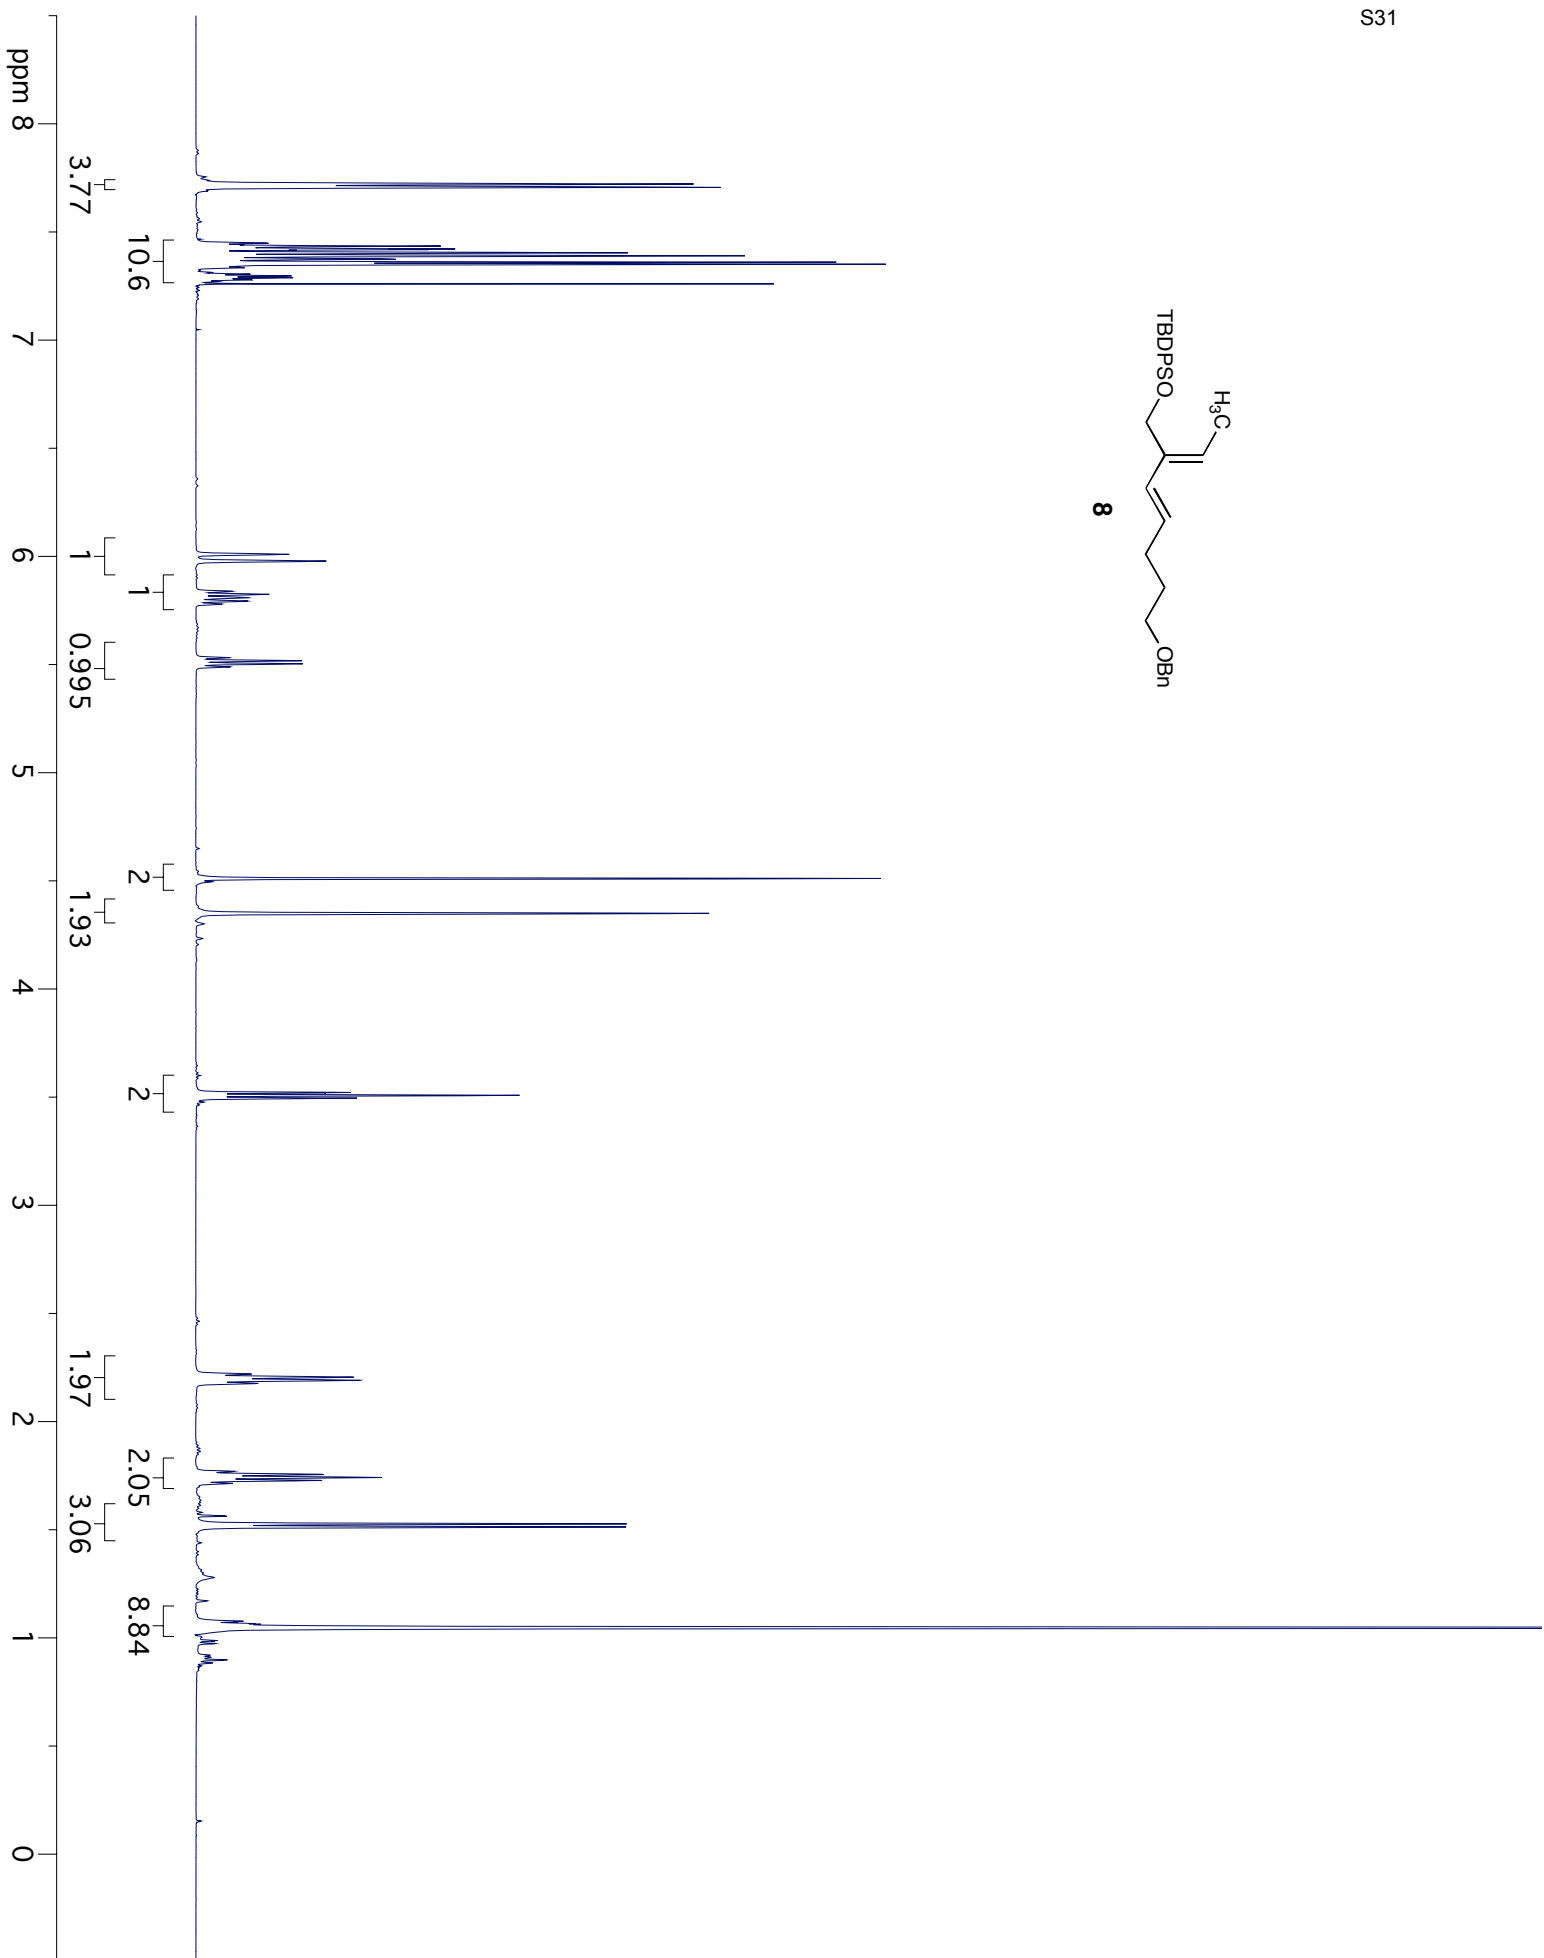



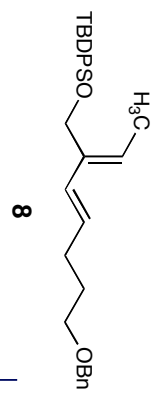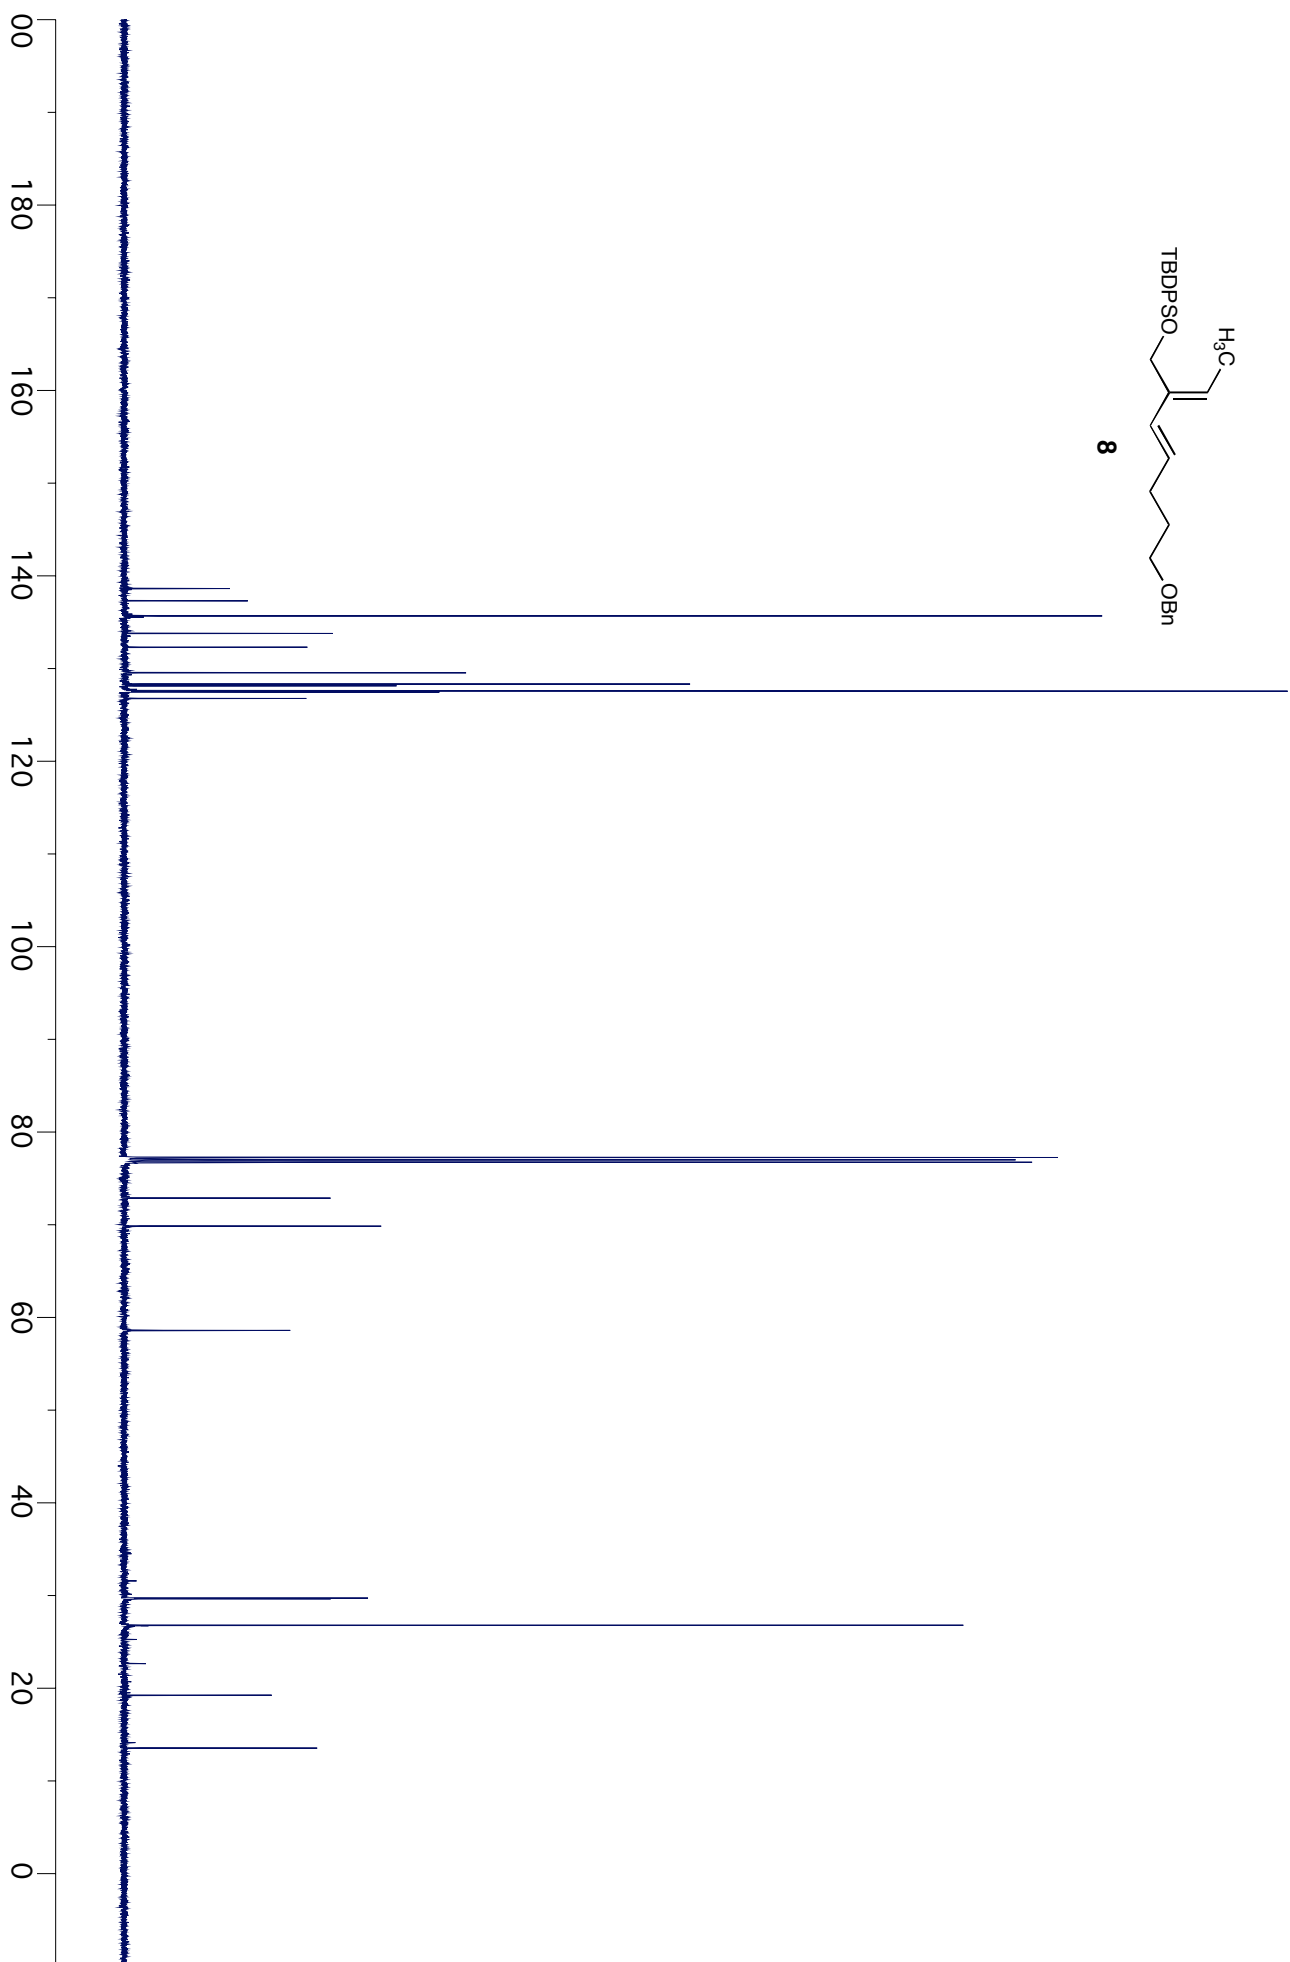



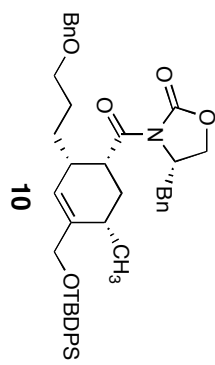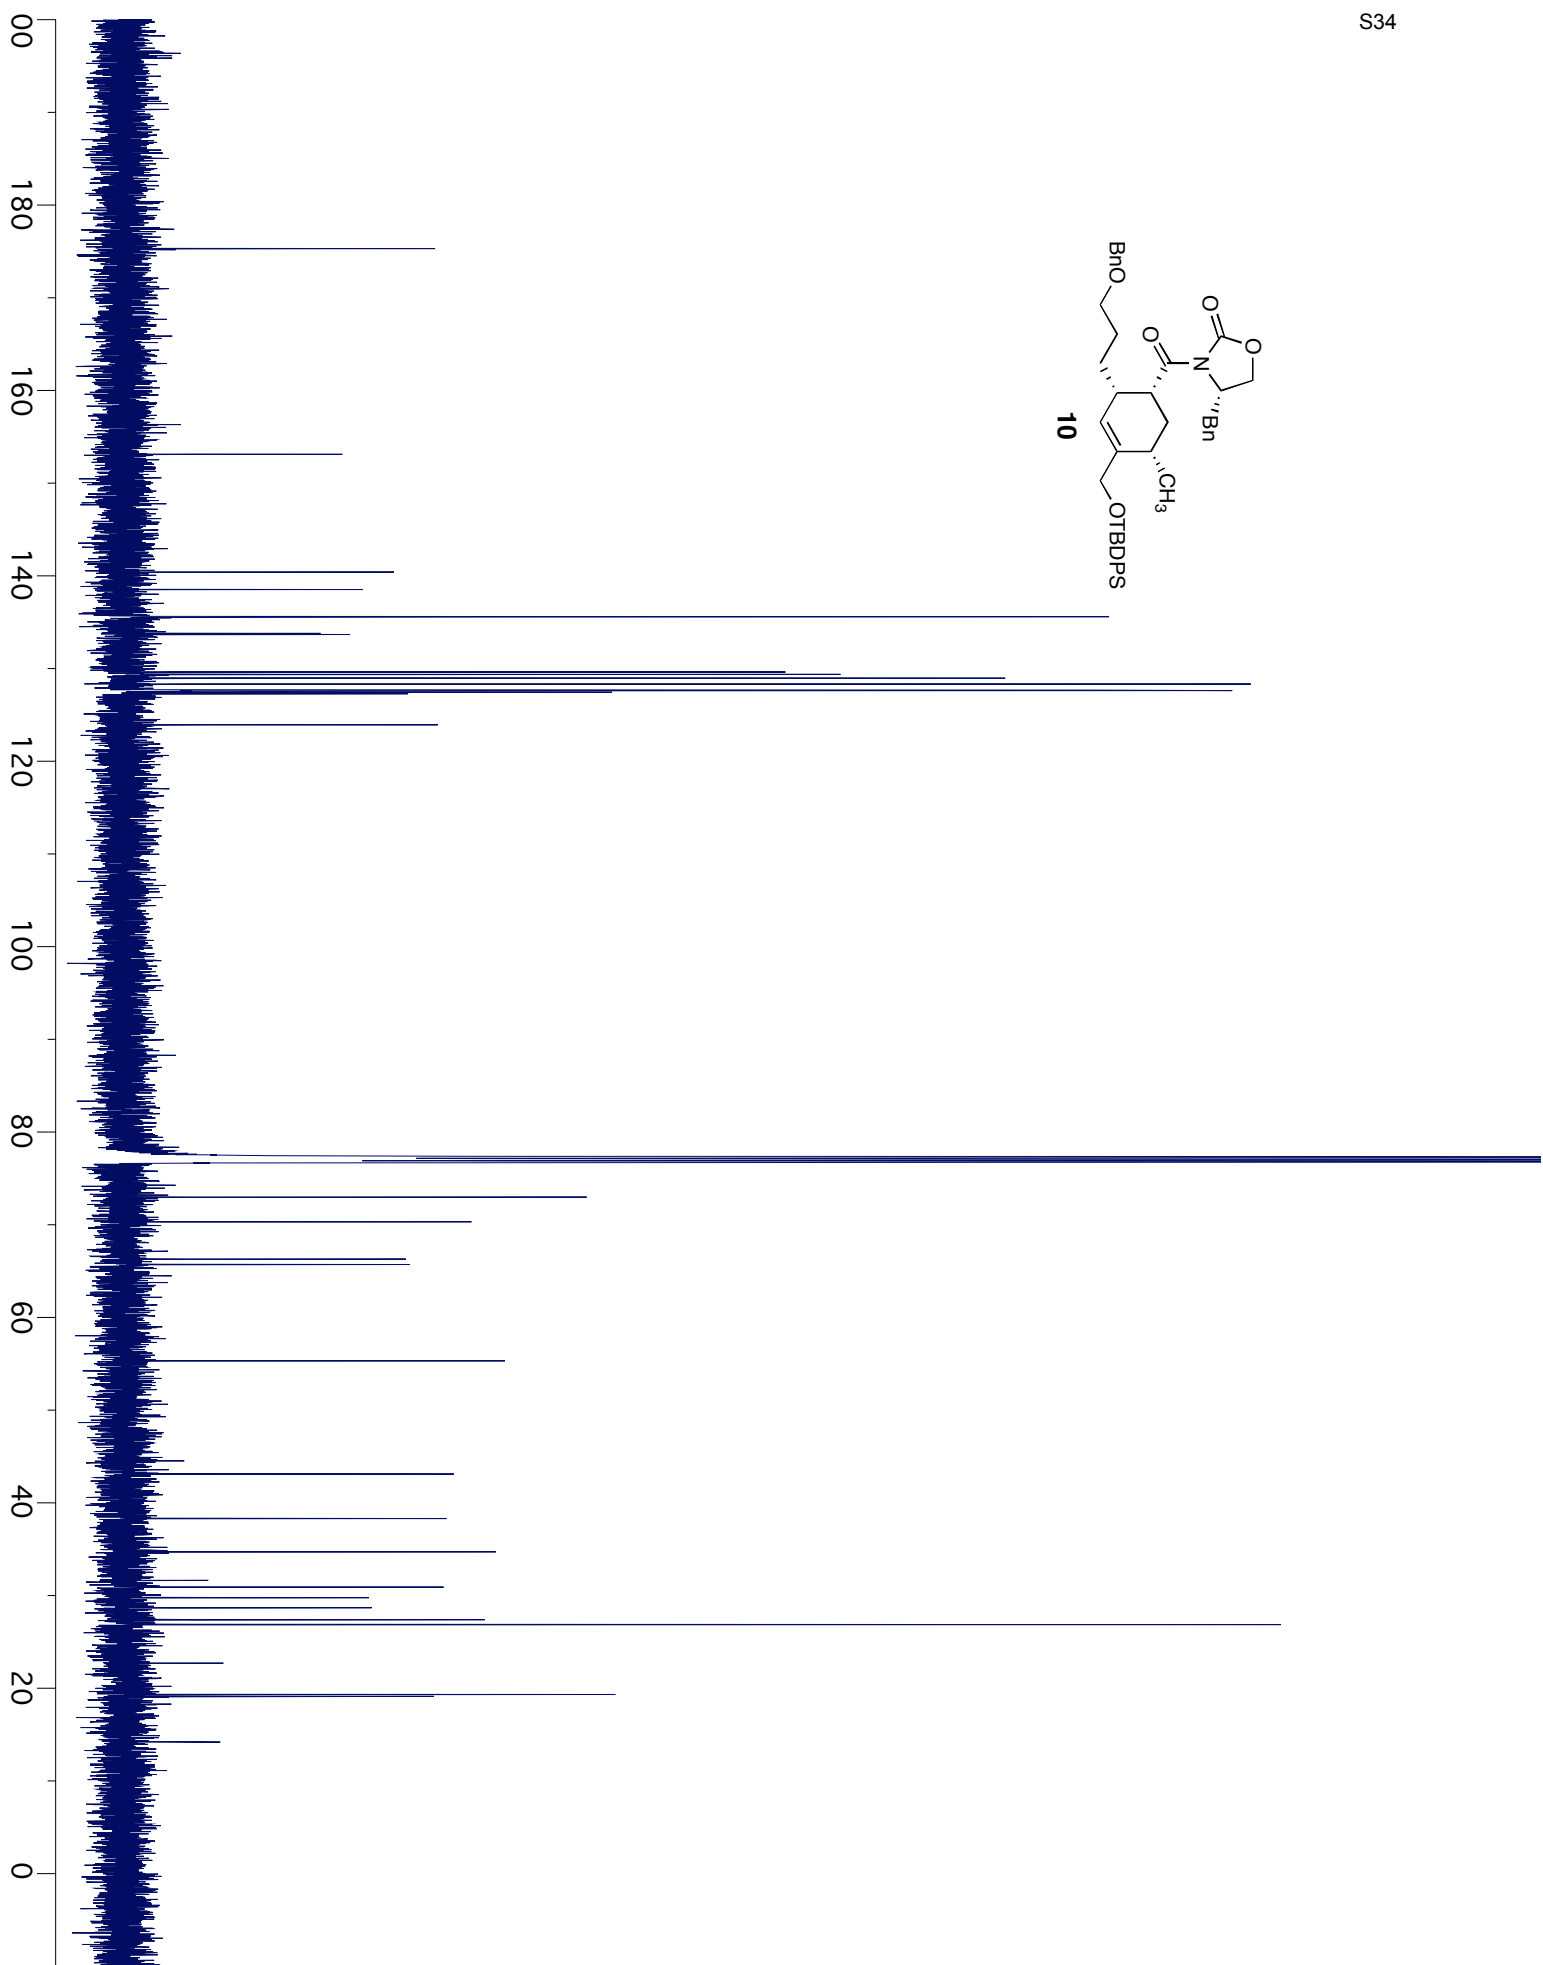

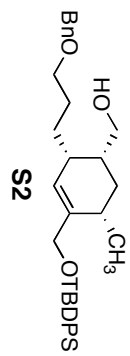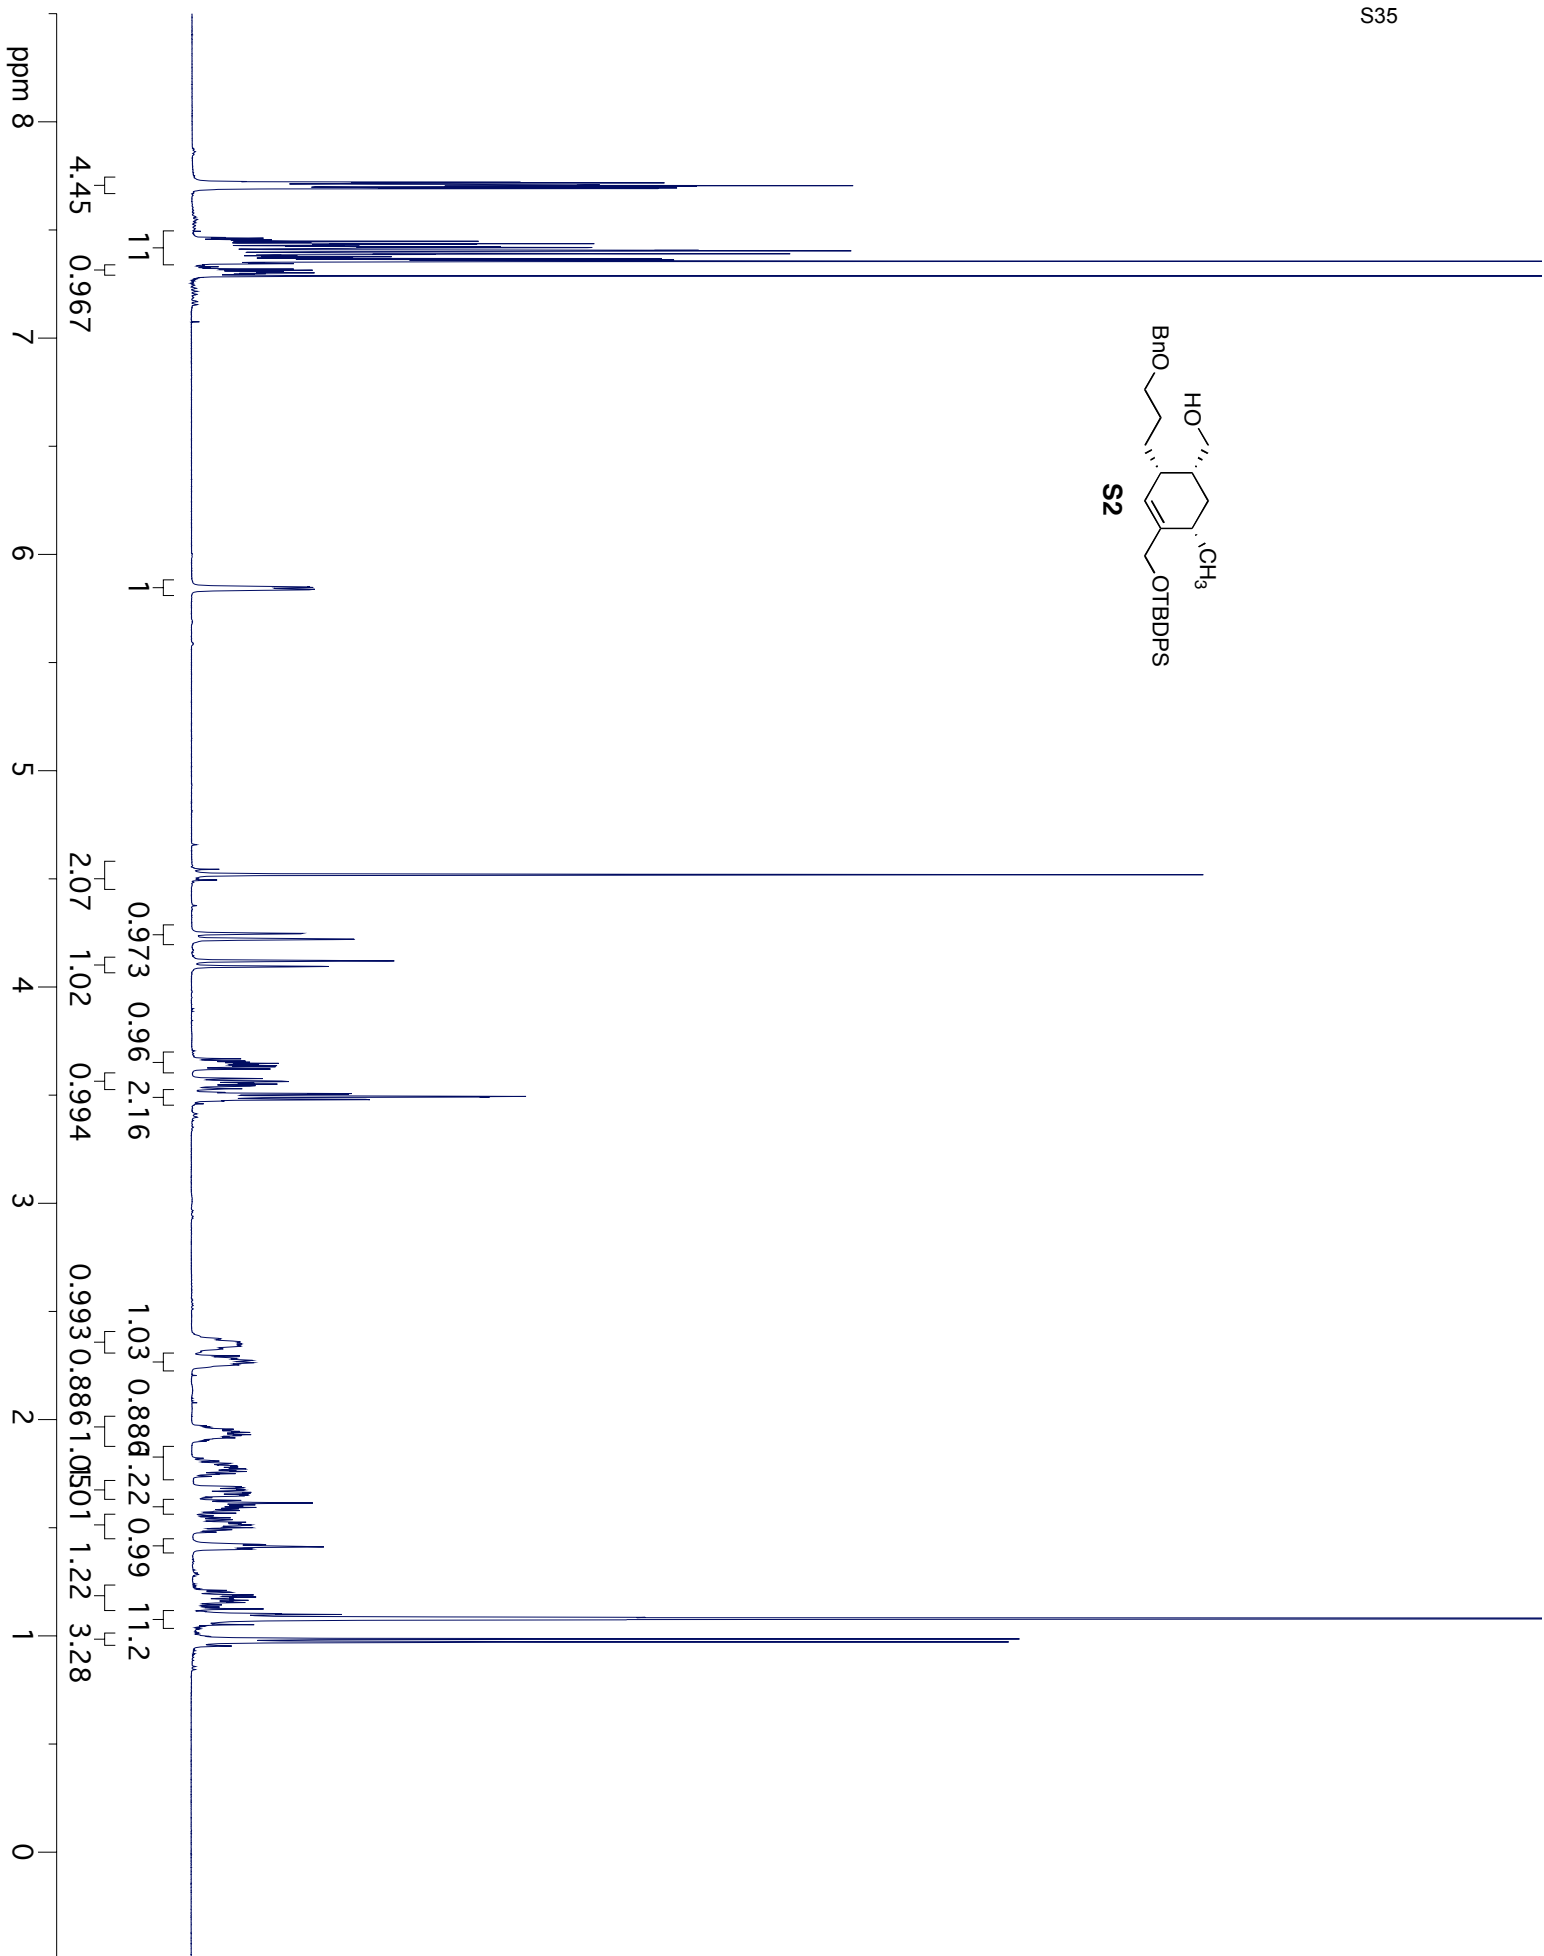

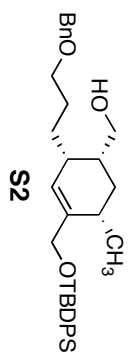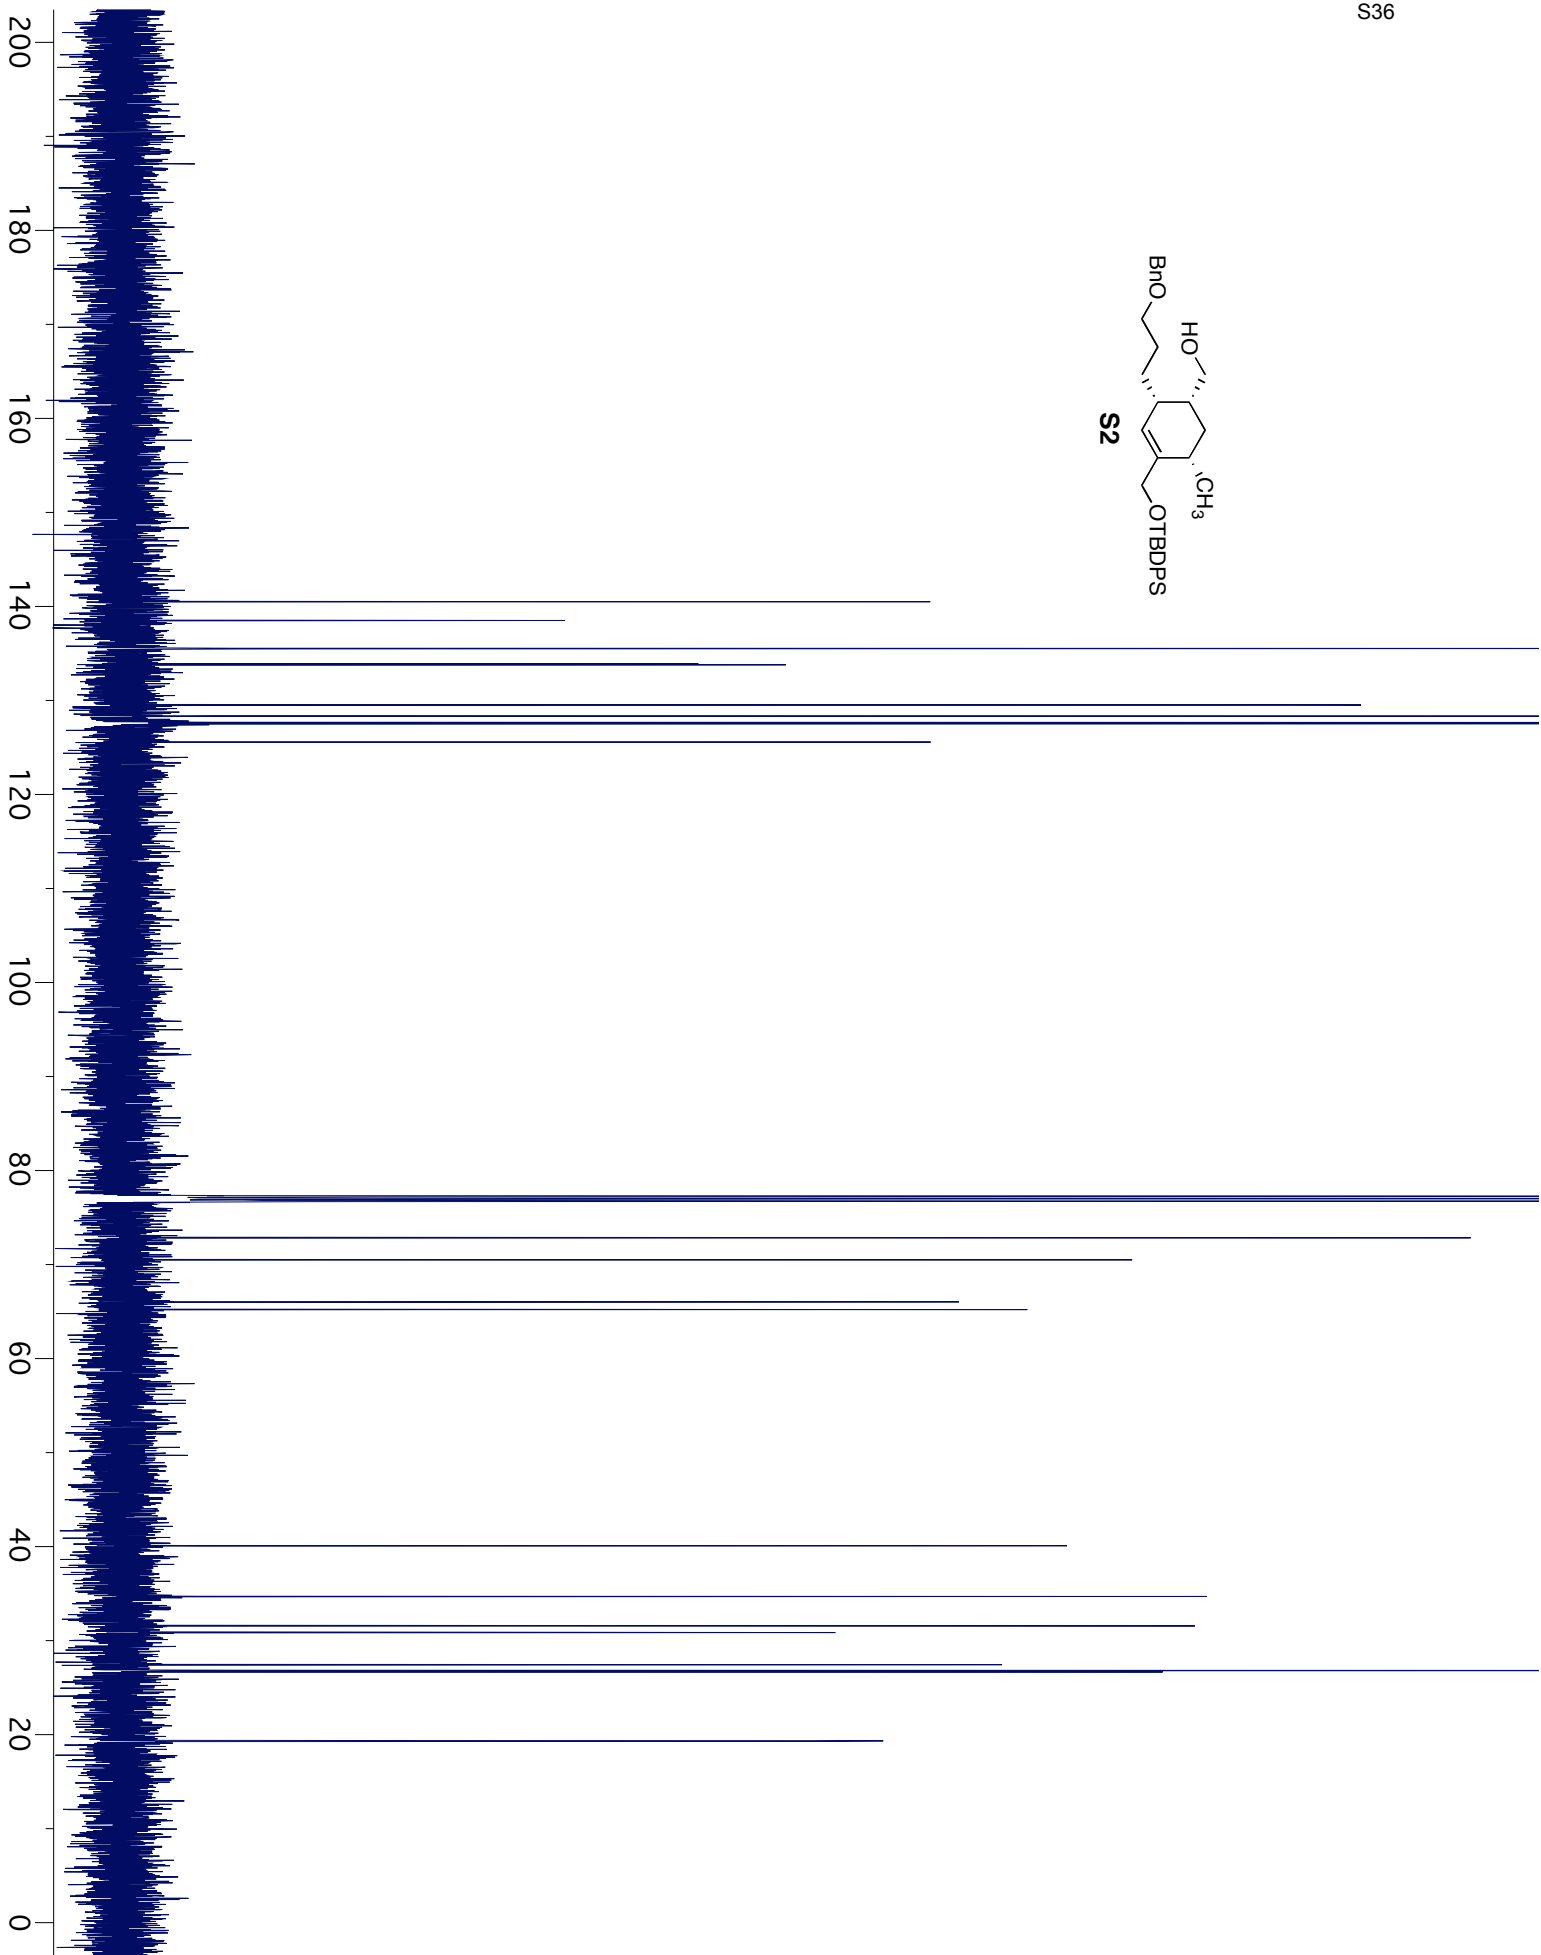

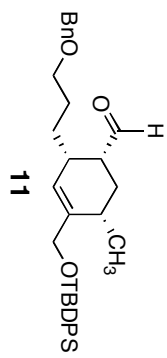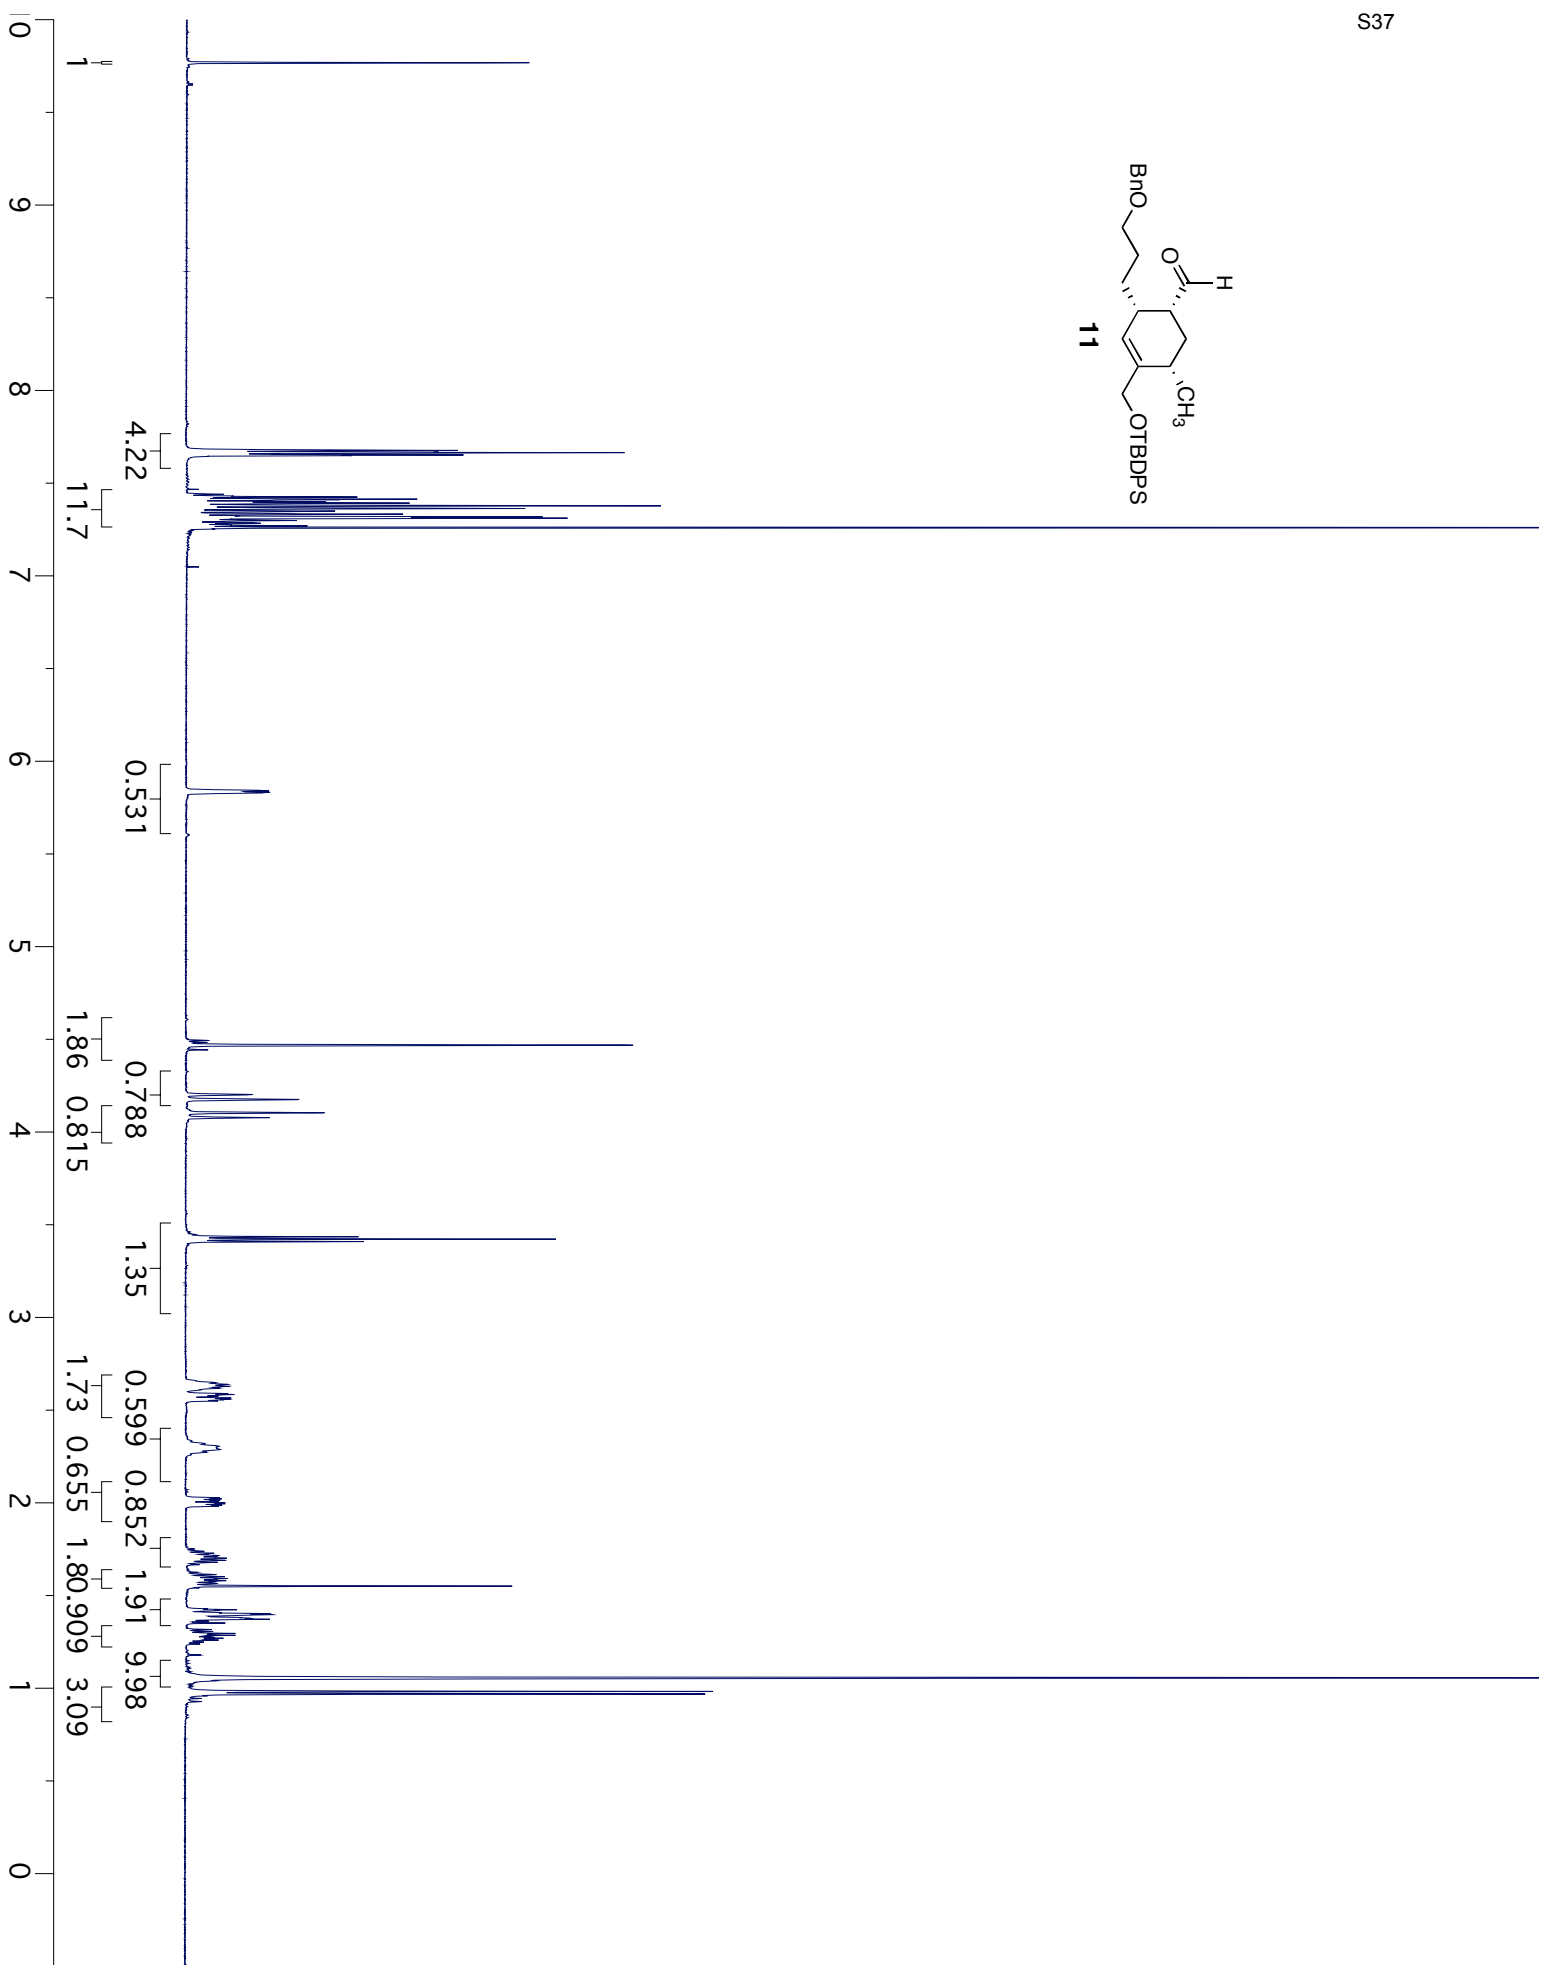



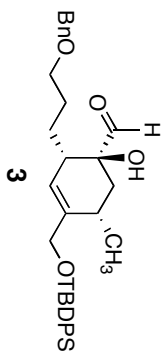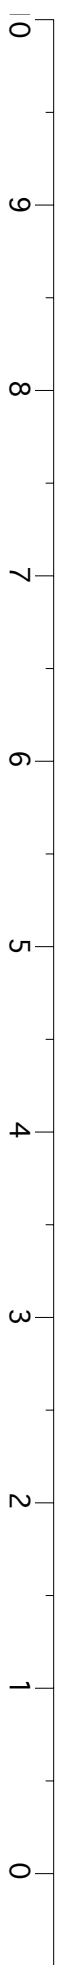



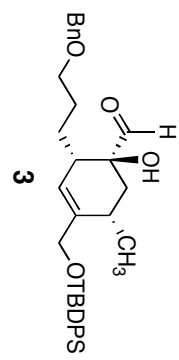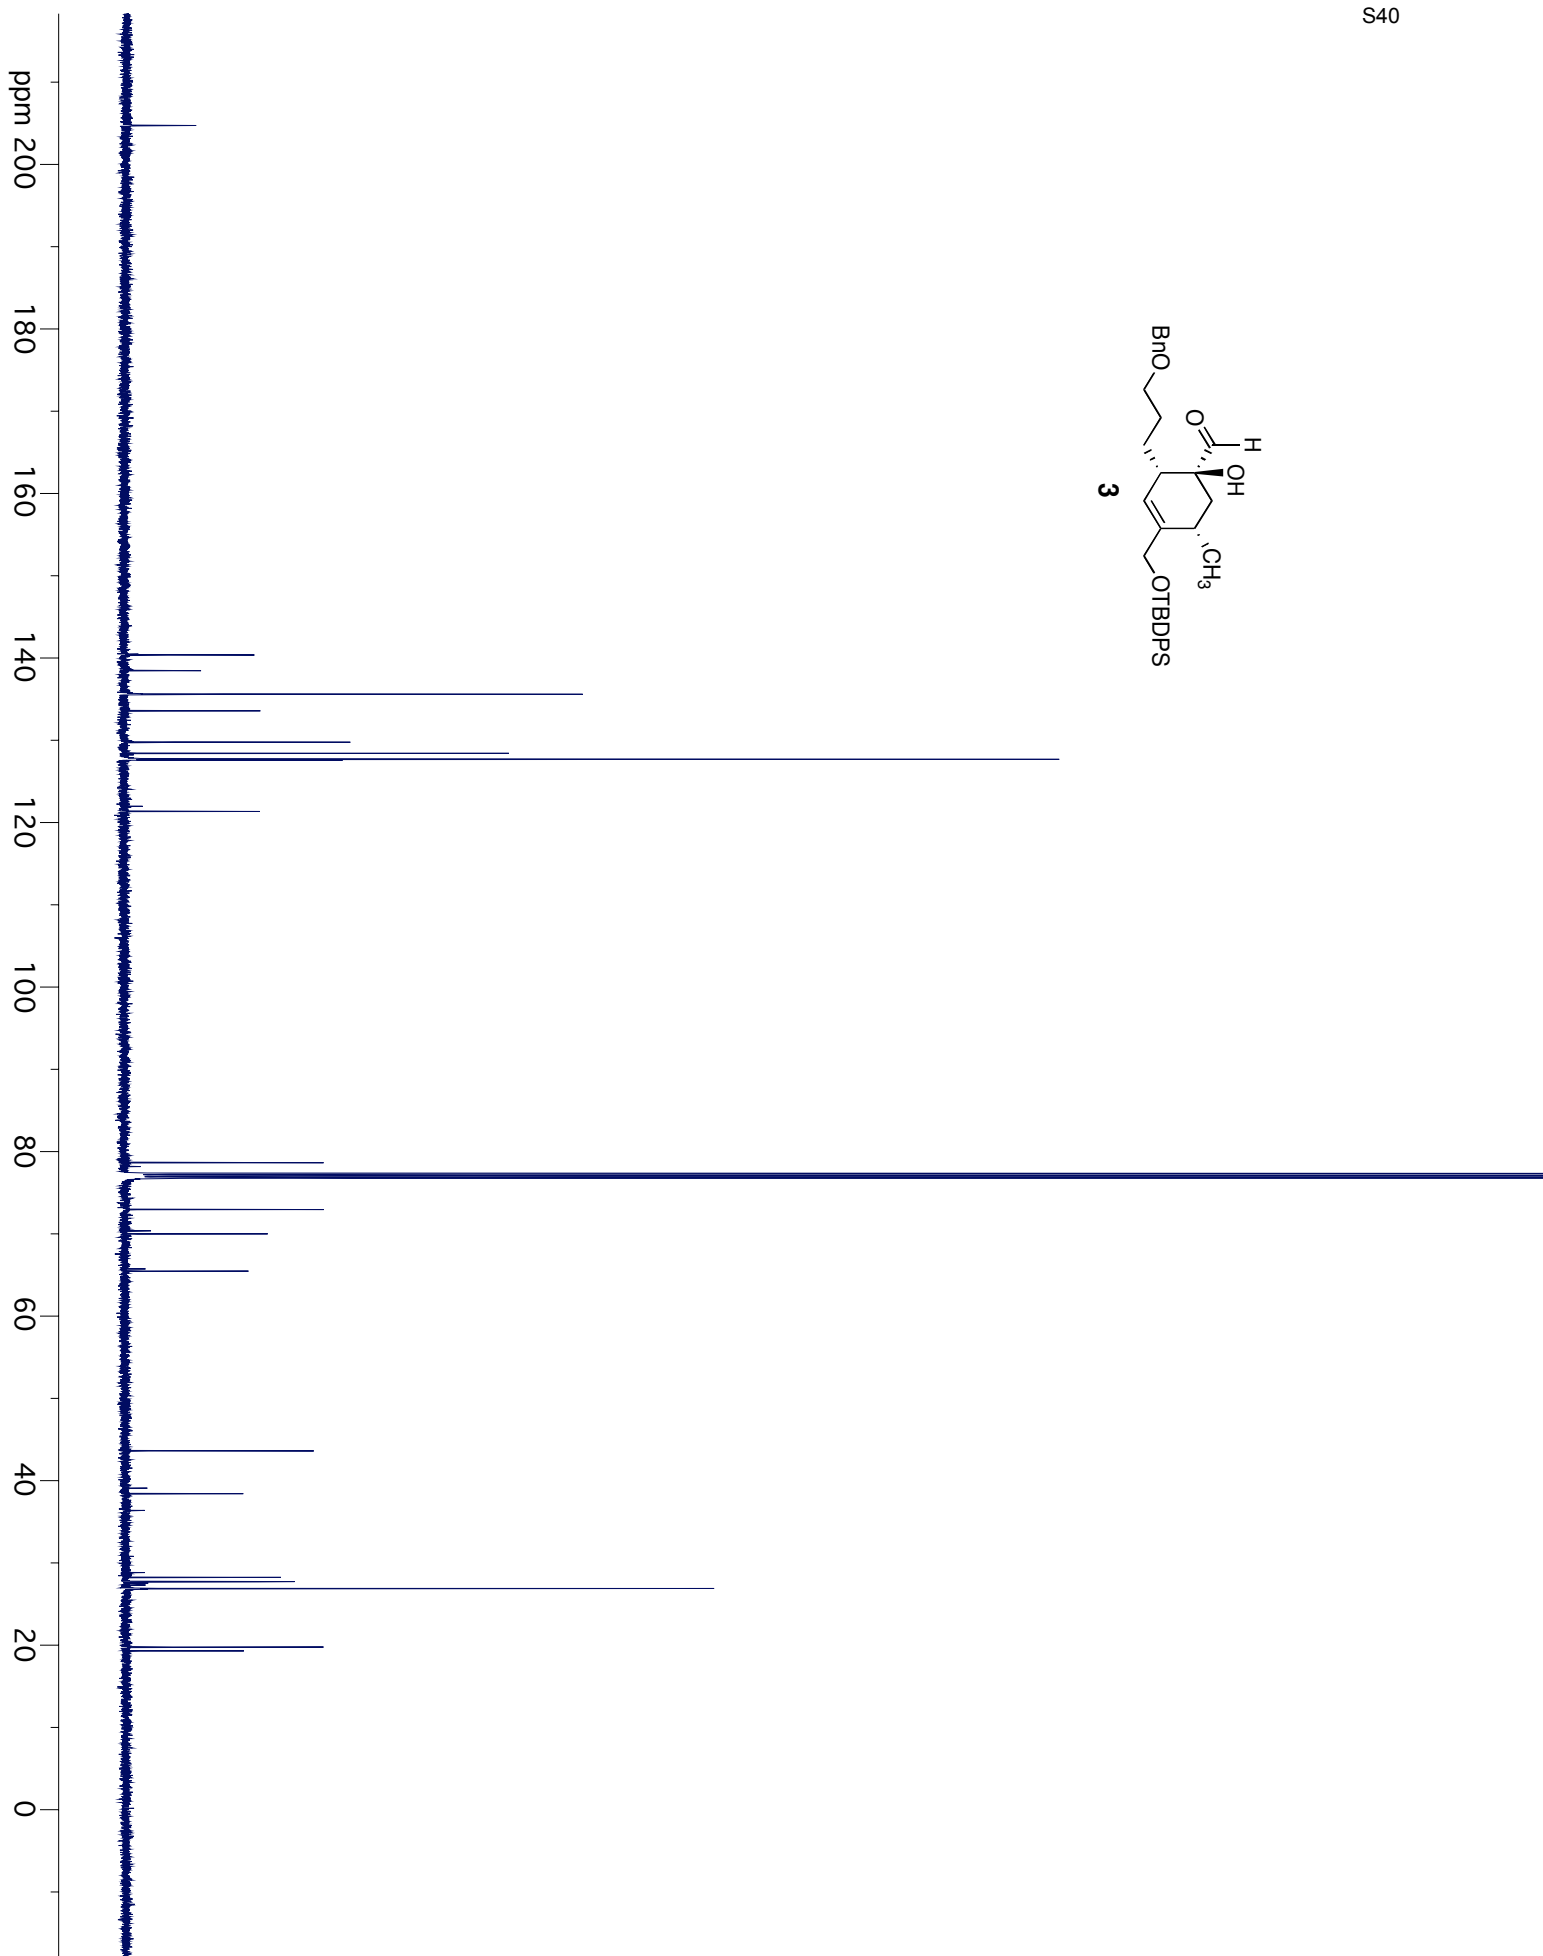

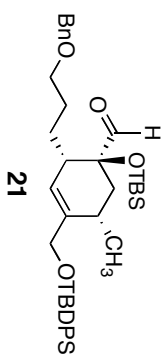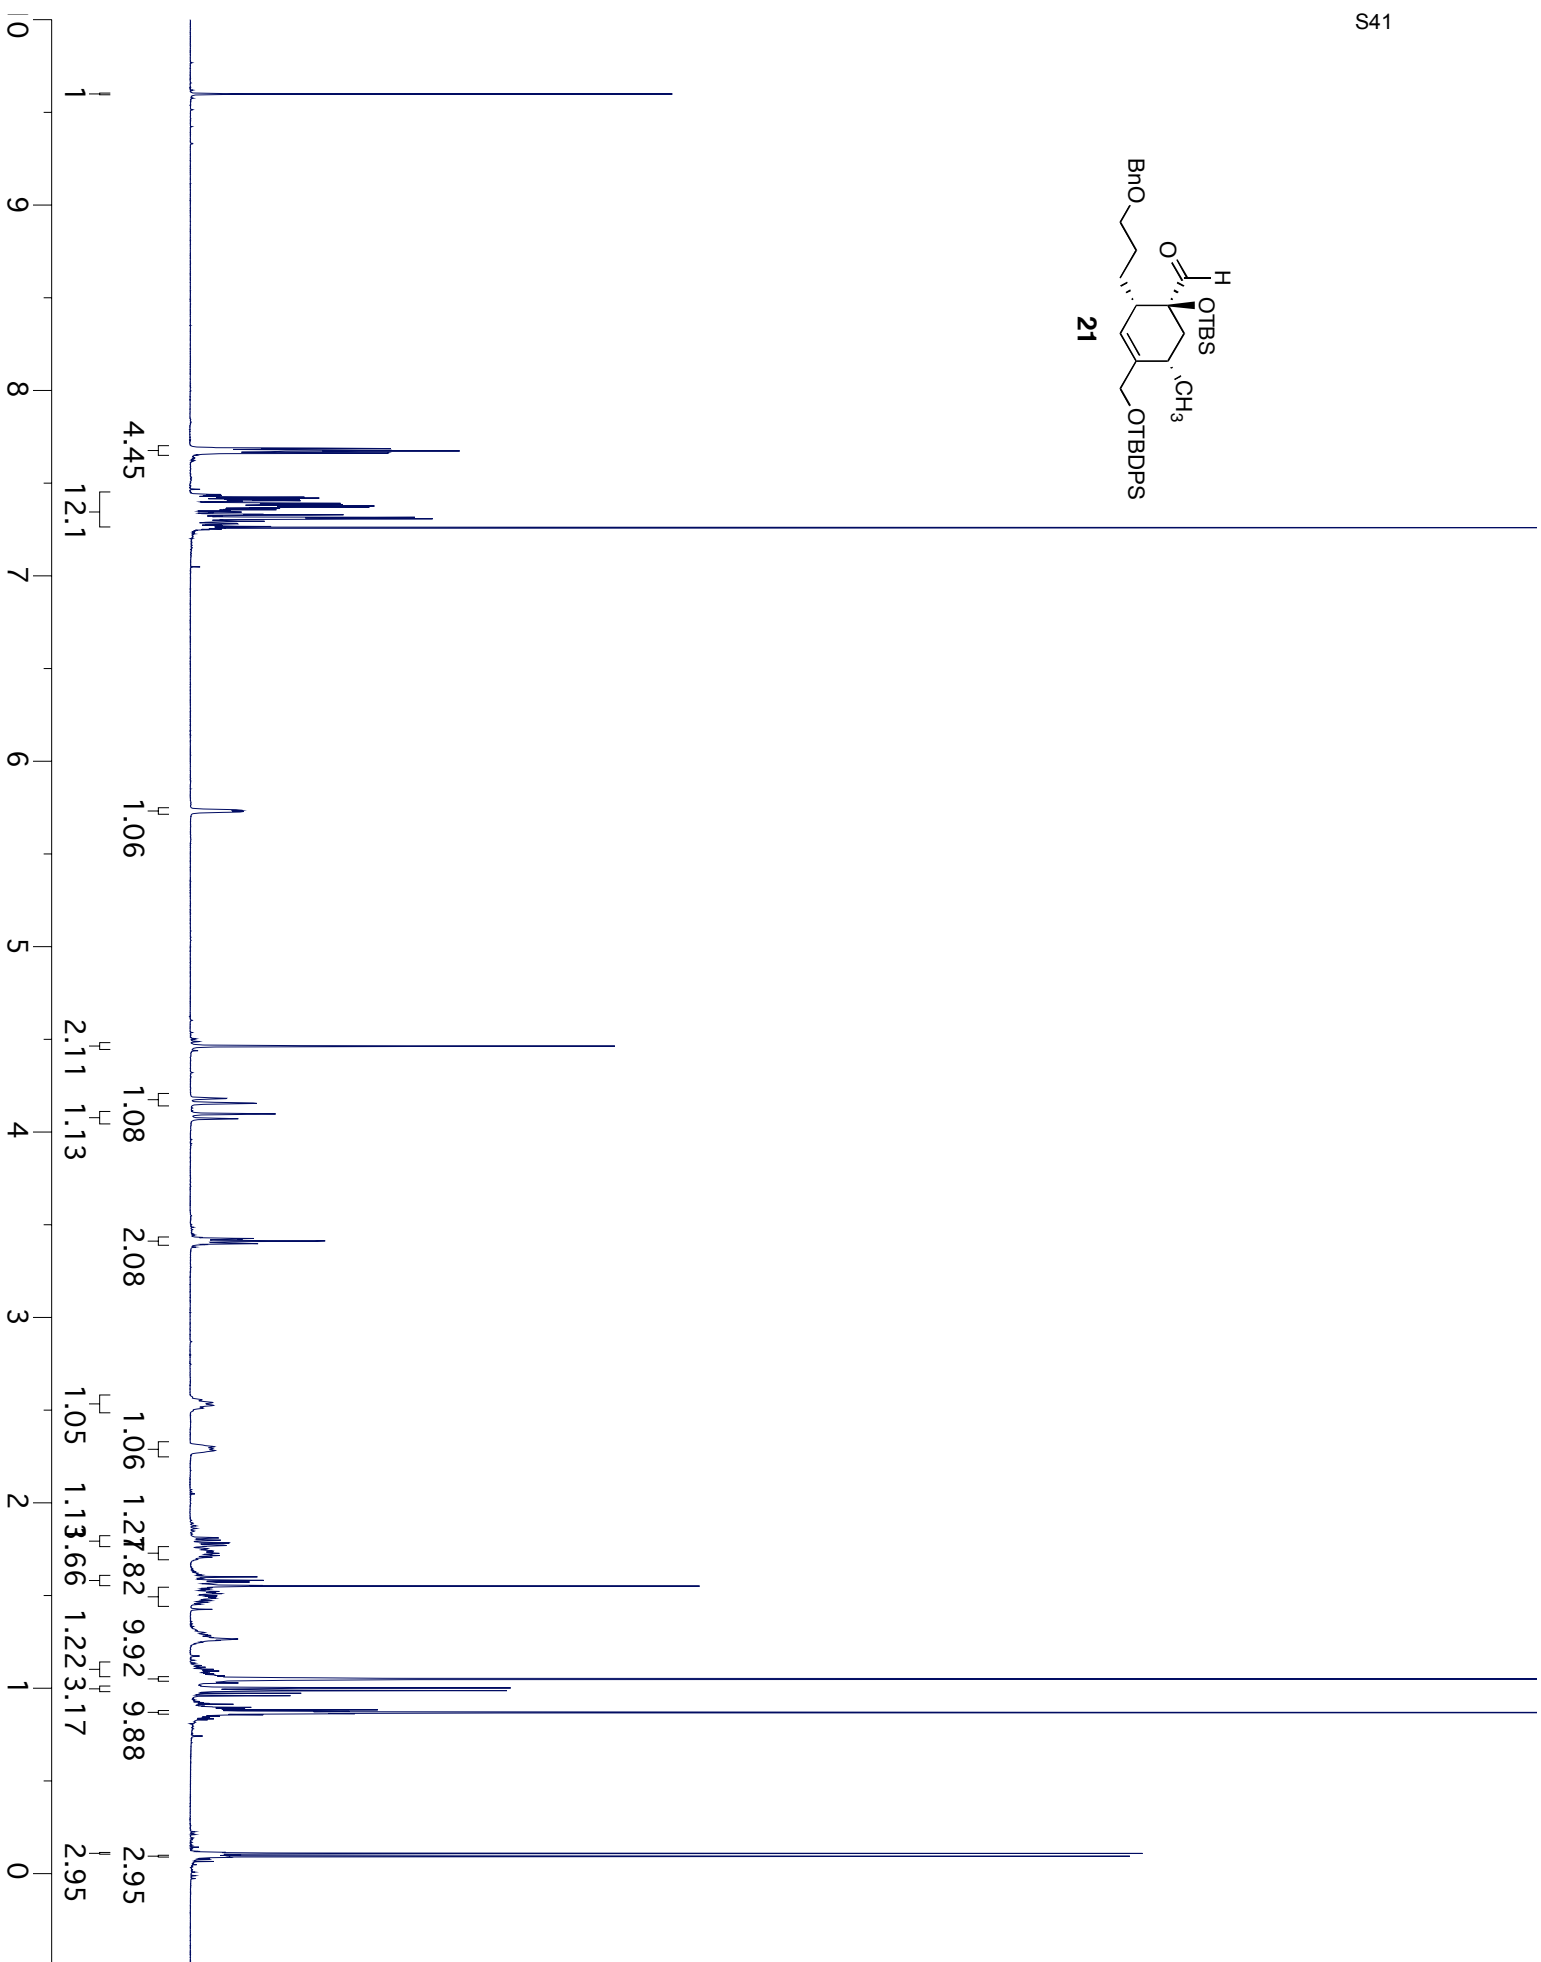

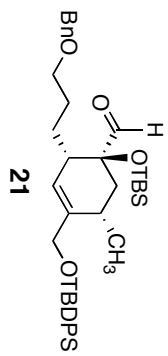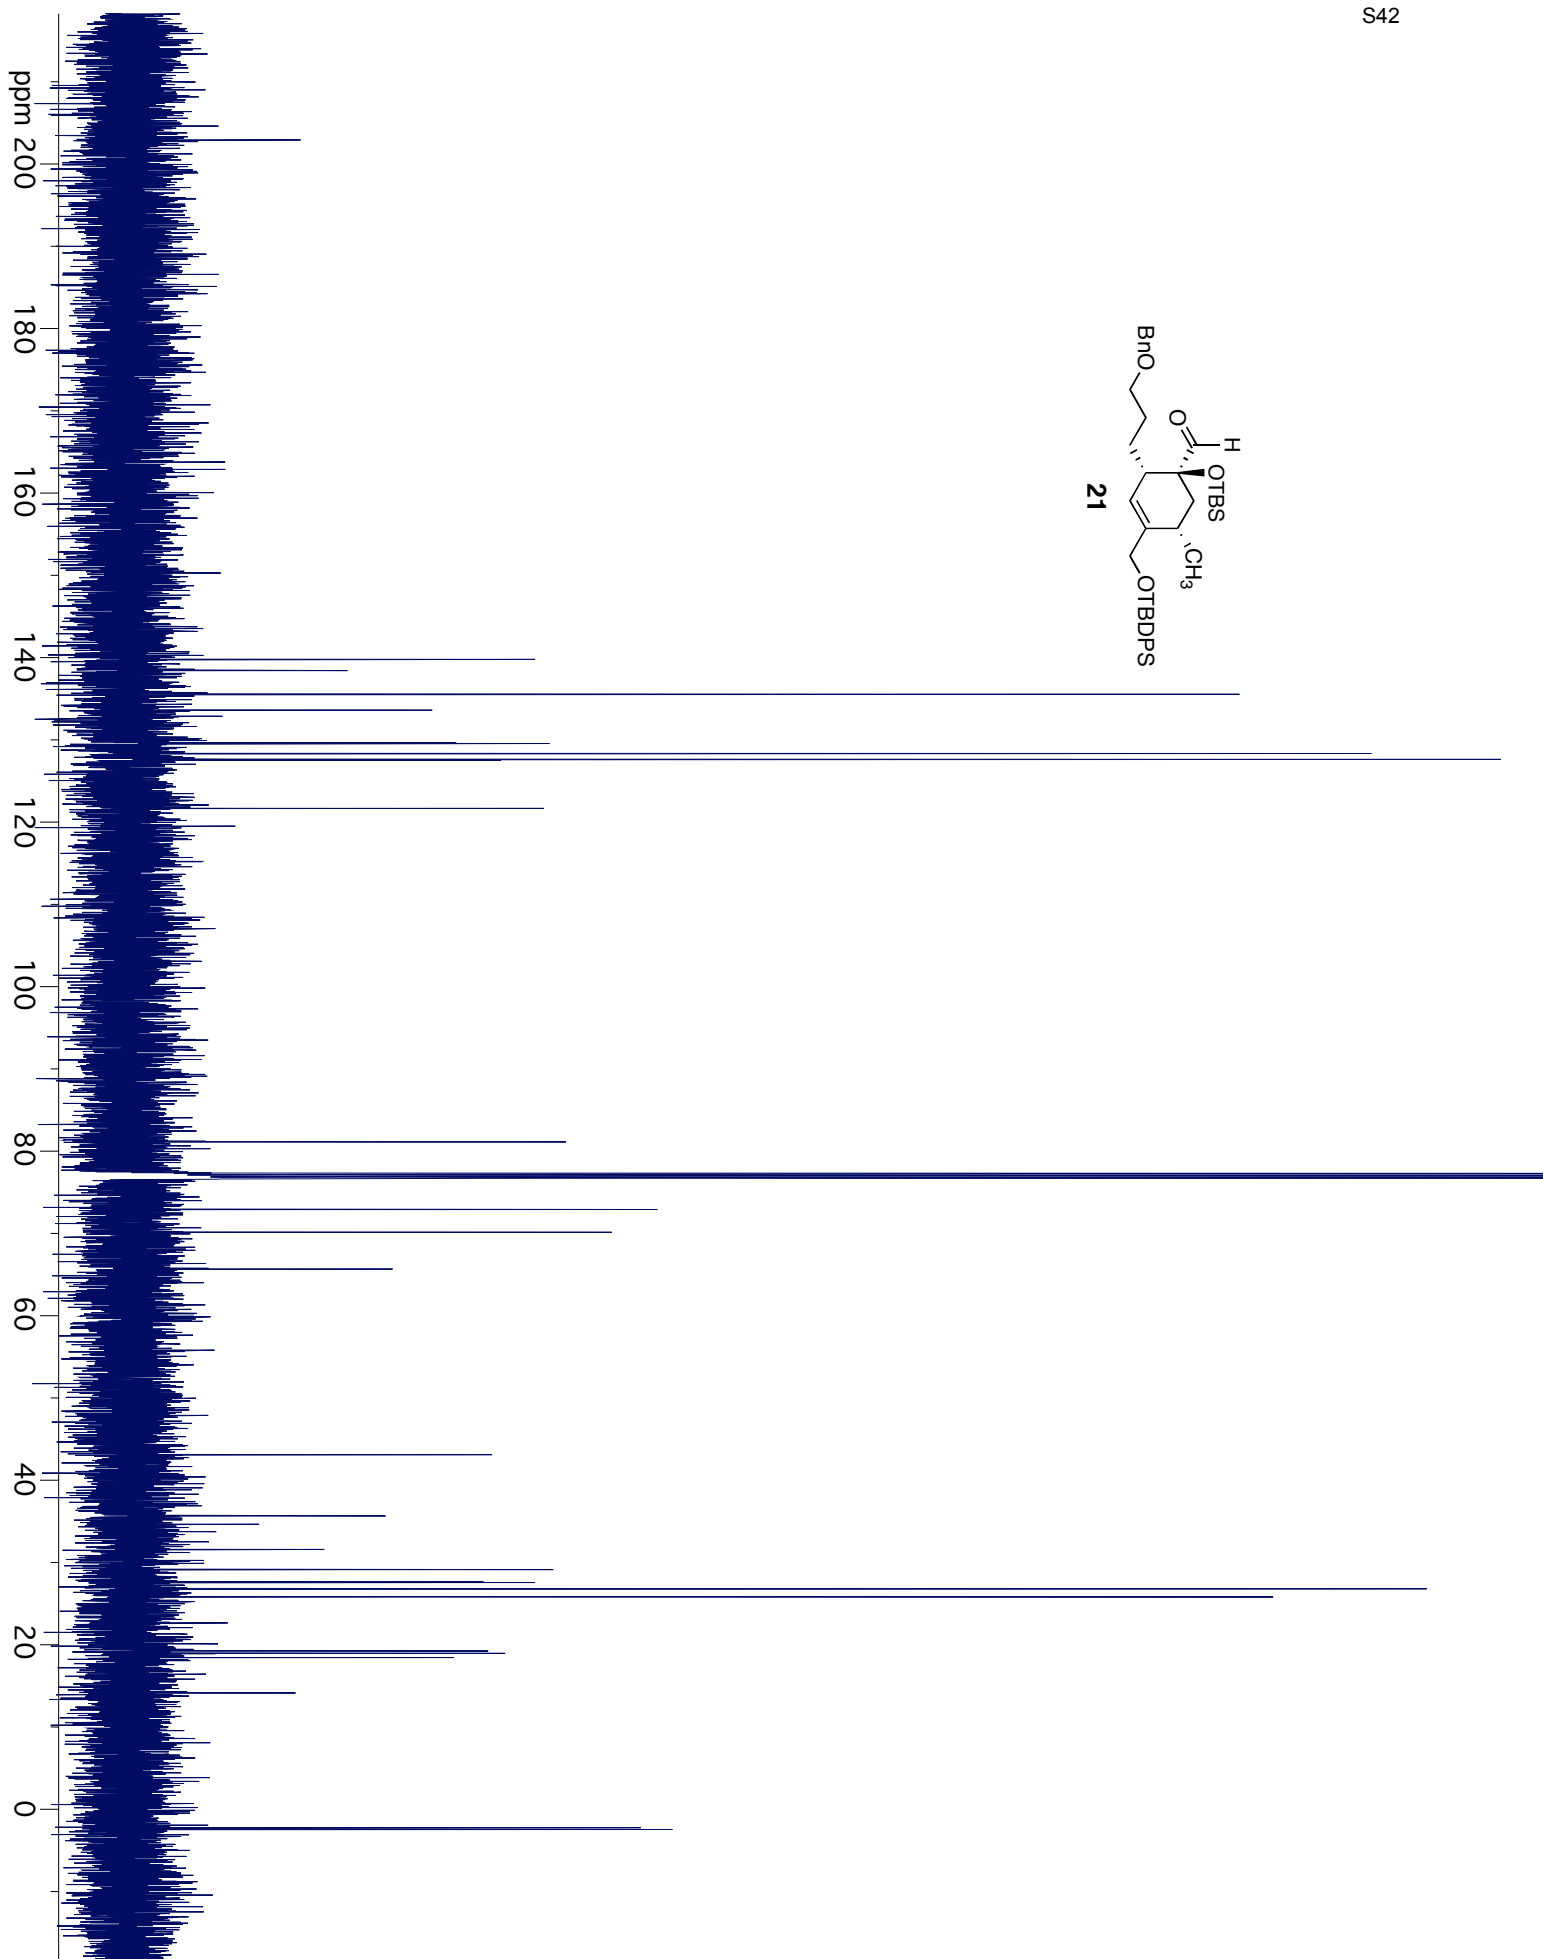

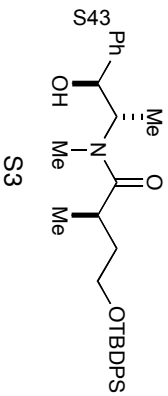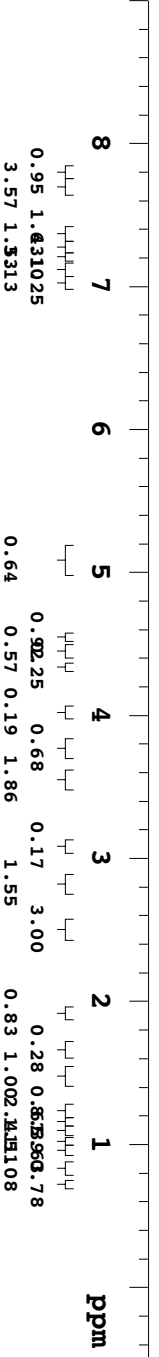

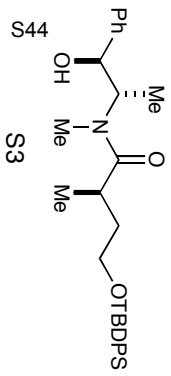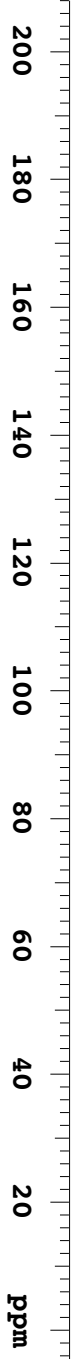

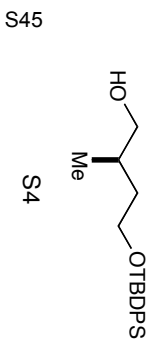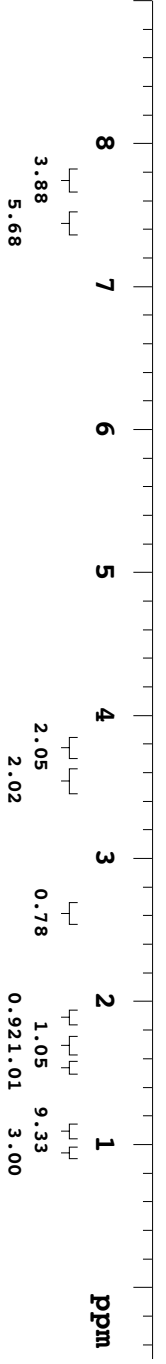

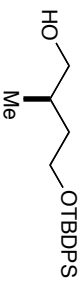

S46

S4

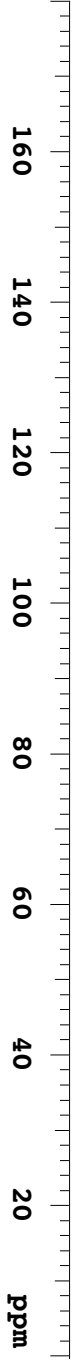

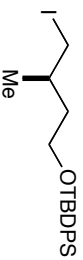

S47

S5

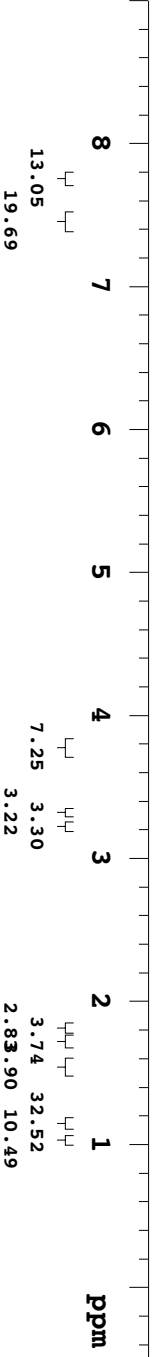



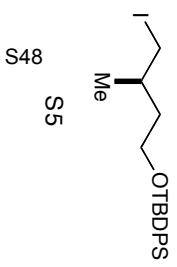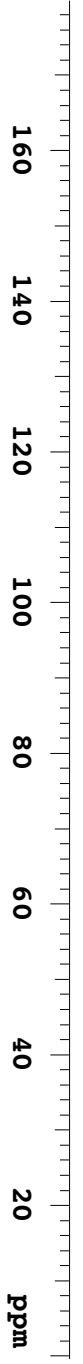

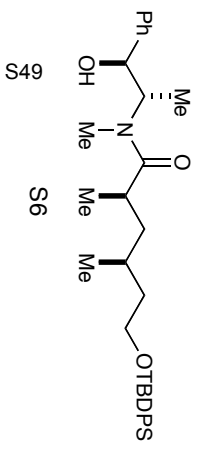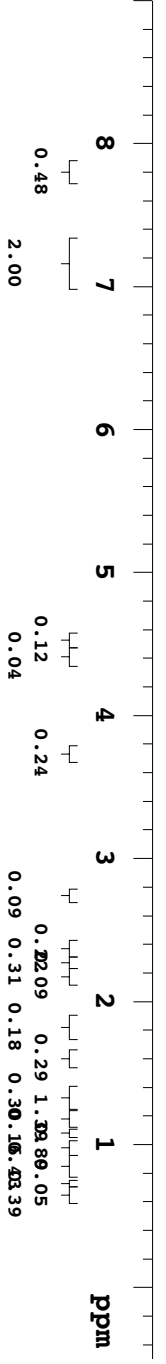

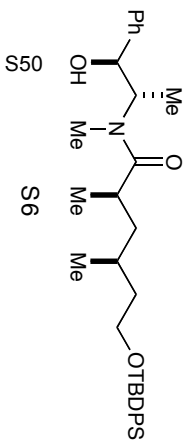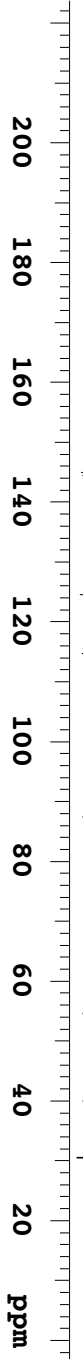

200

180

160

140

120

100

80

60

40

20

ppm



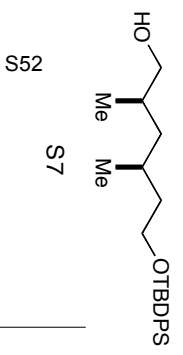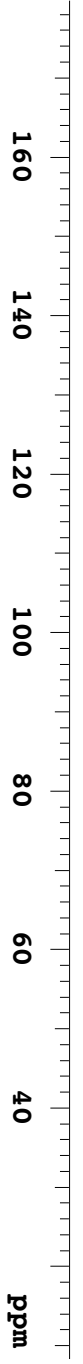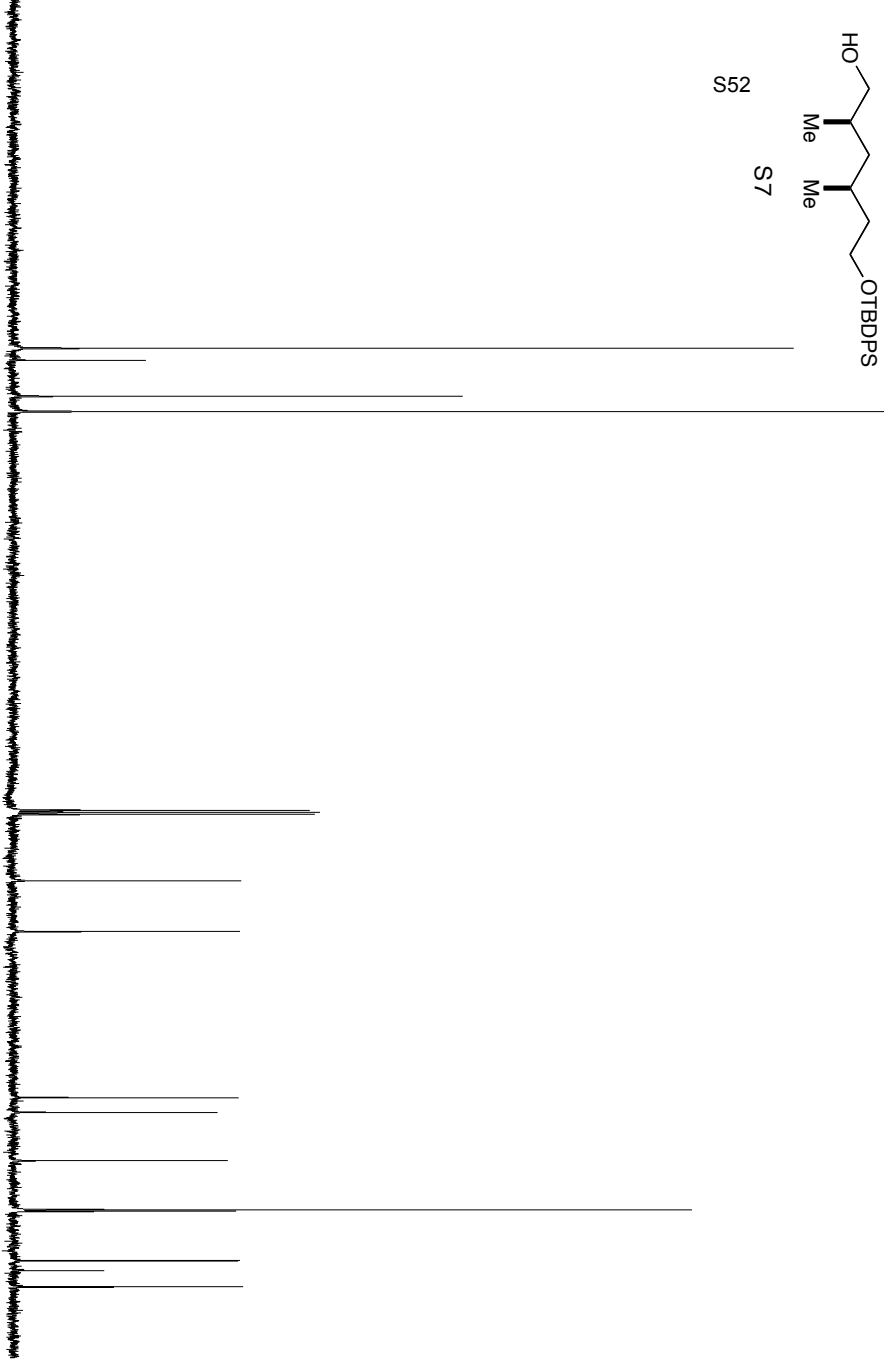

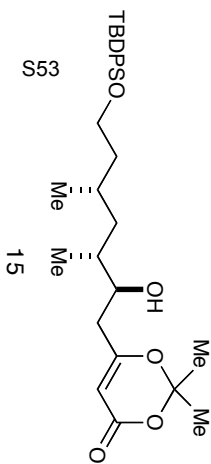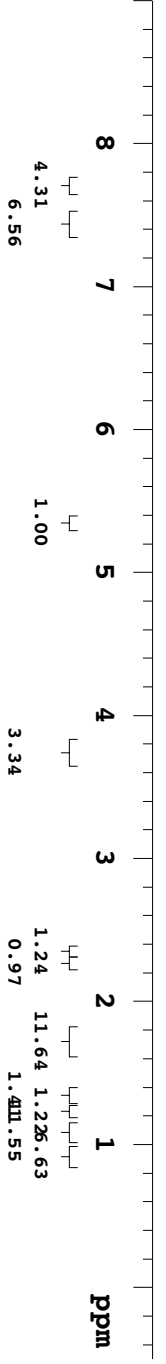



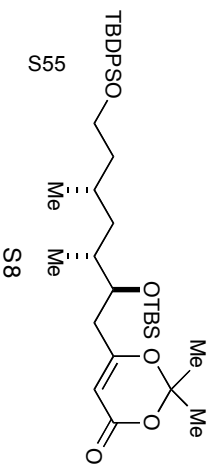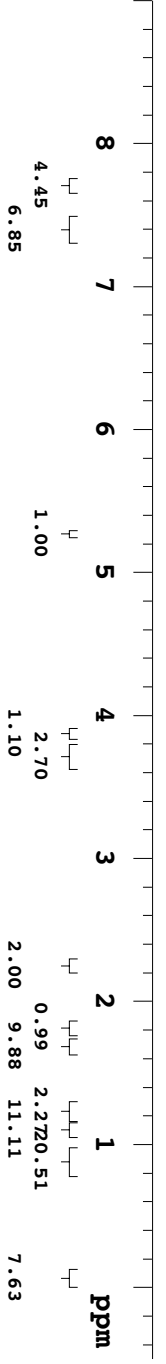



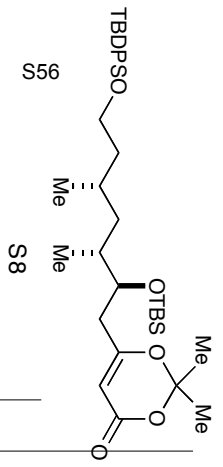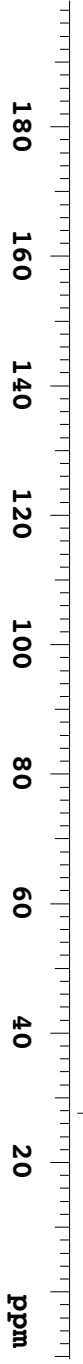

S56

S8

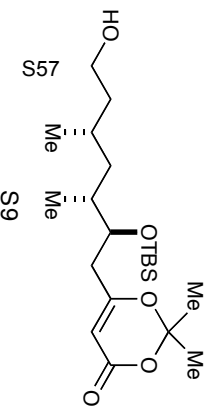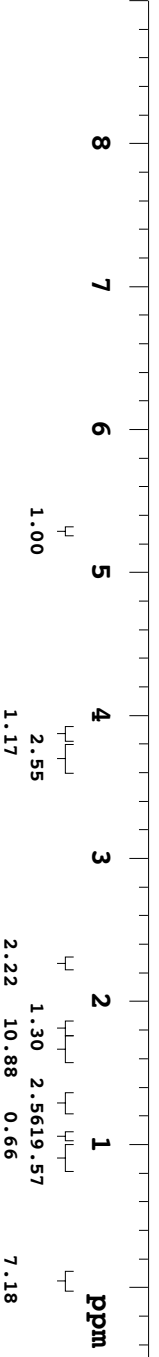

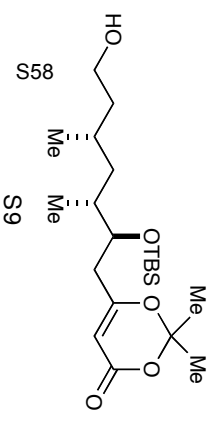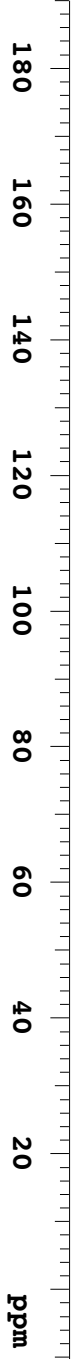

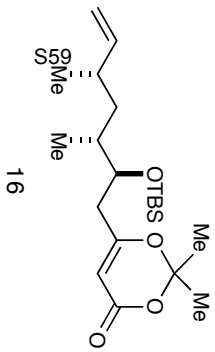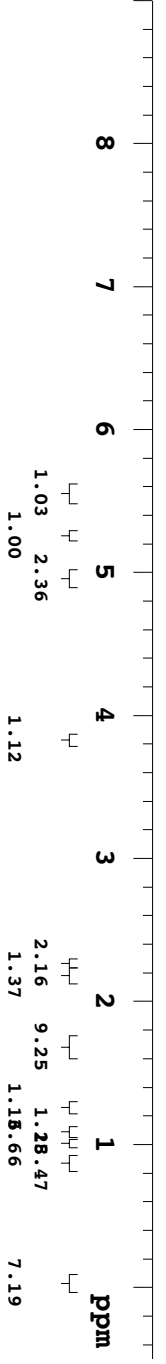

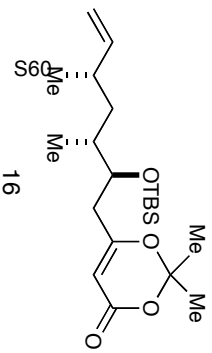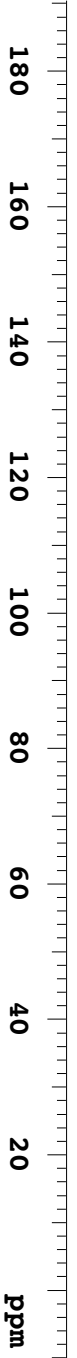

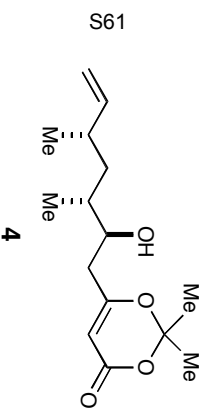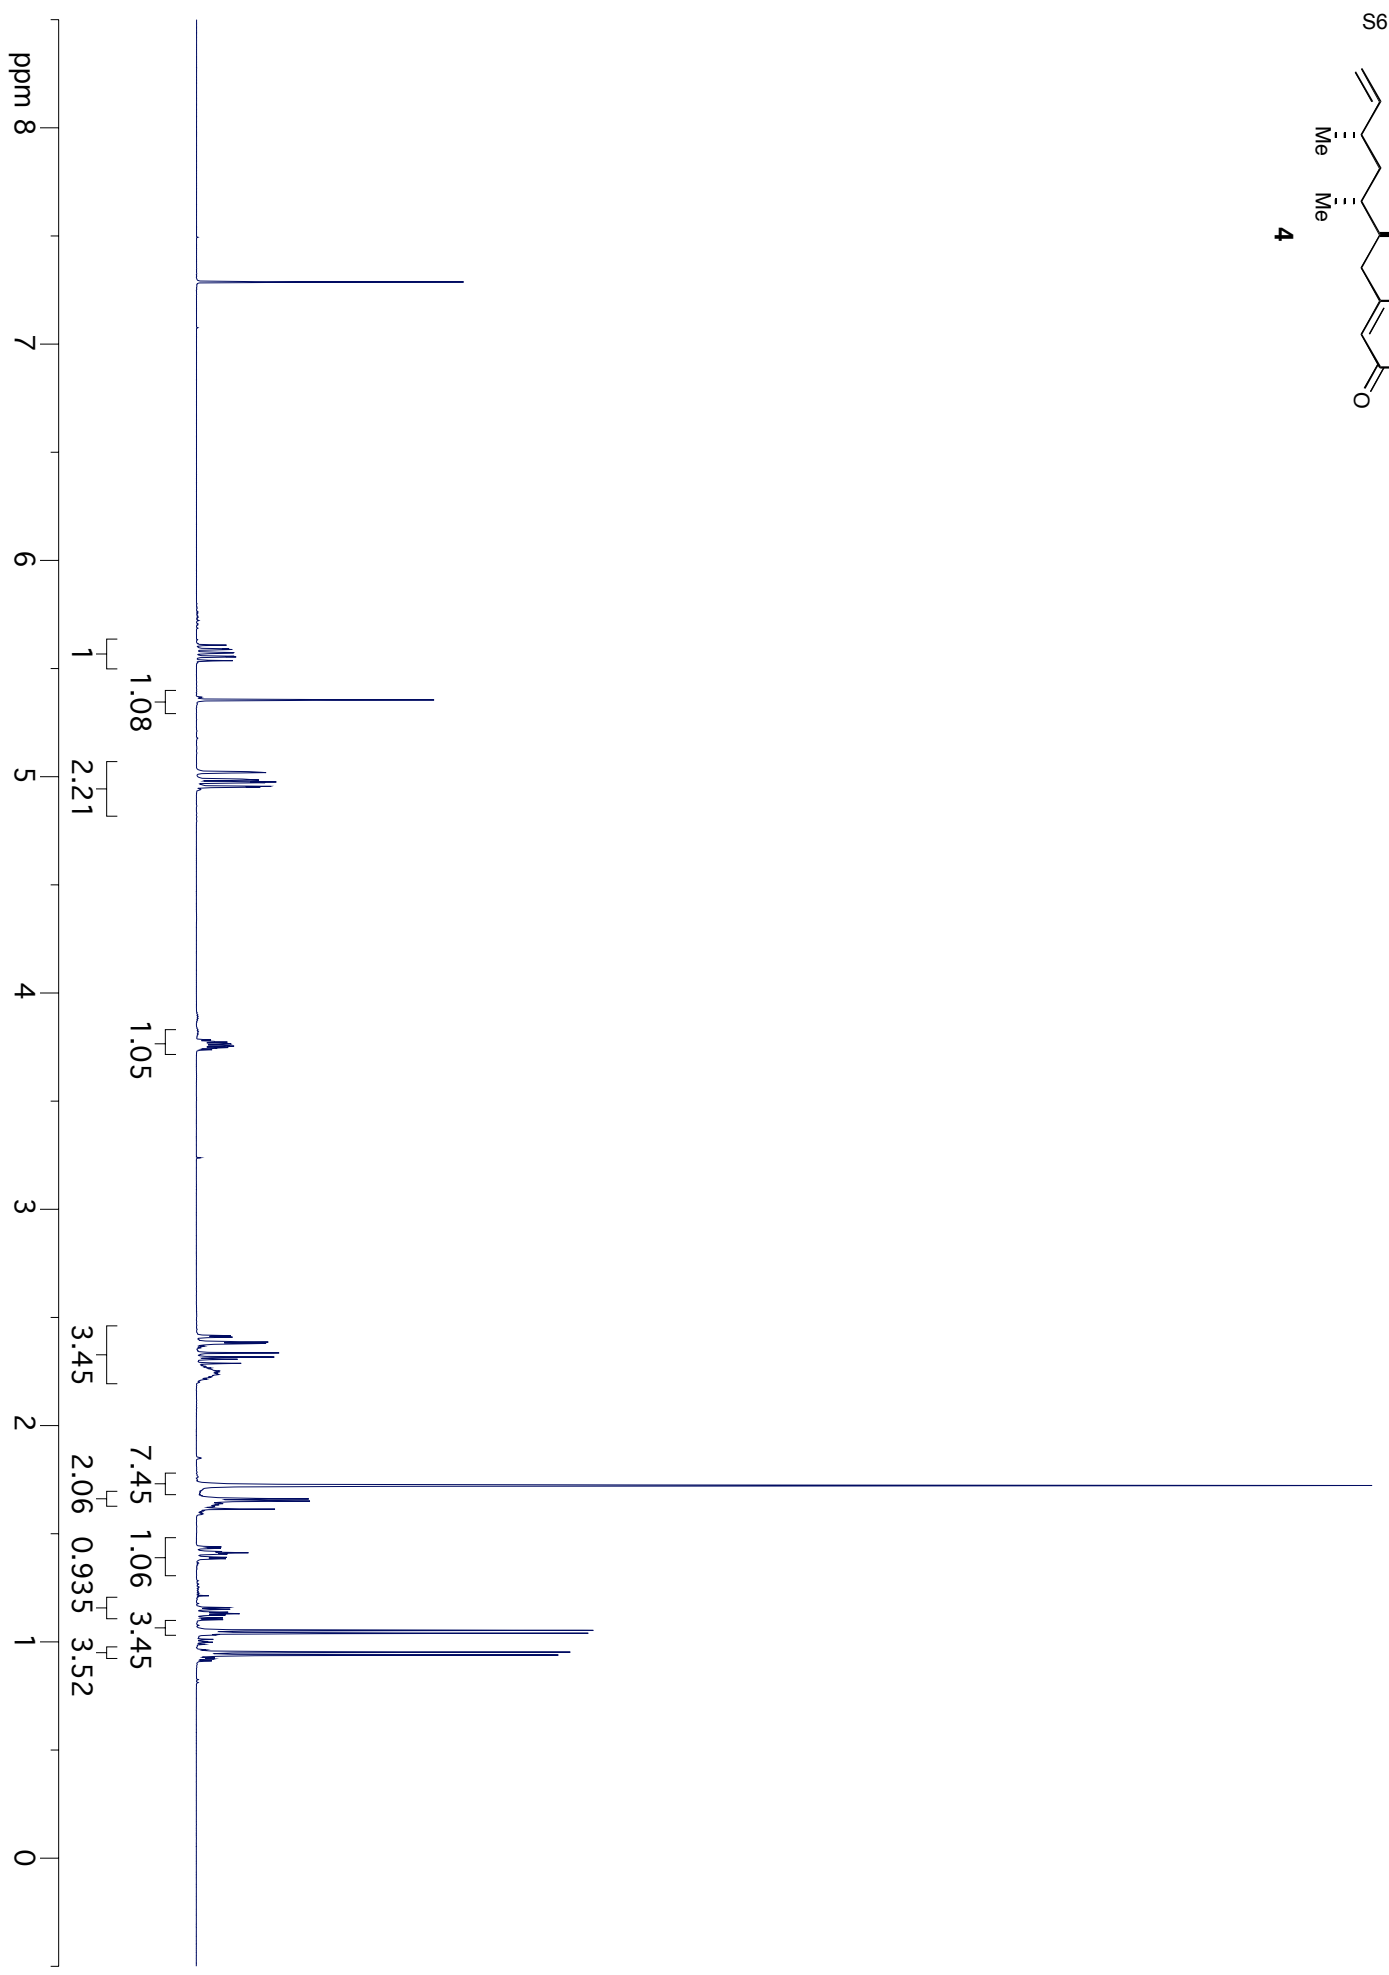

S62

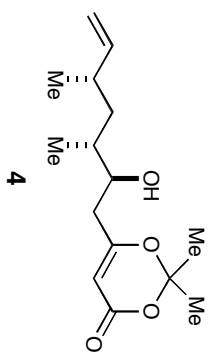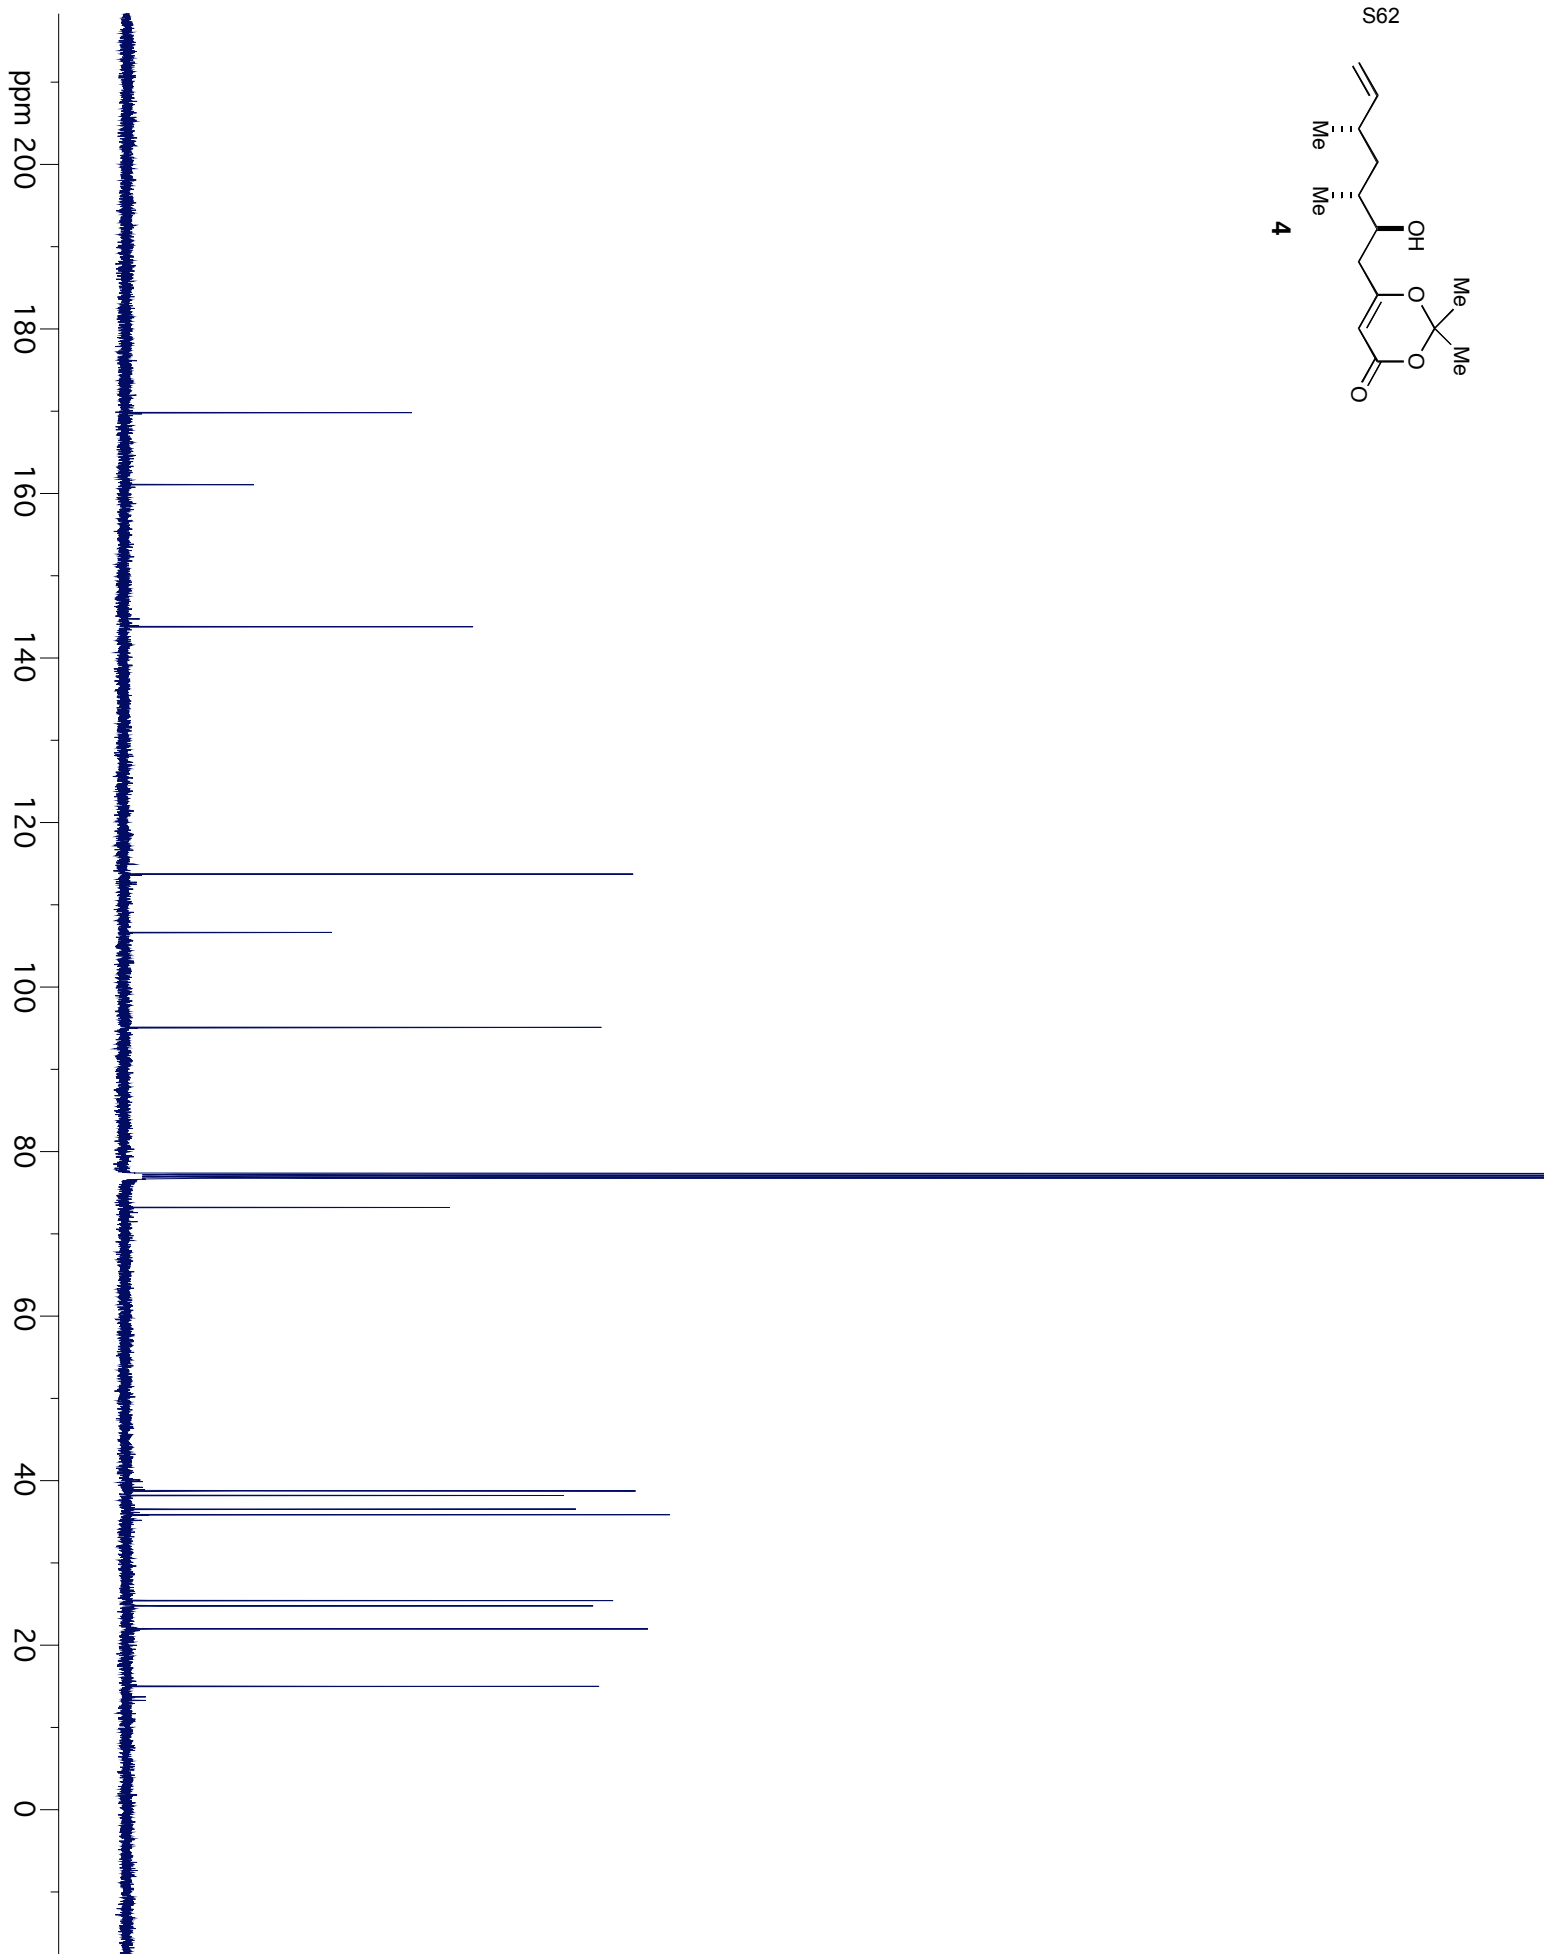

S63

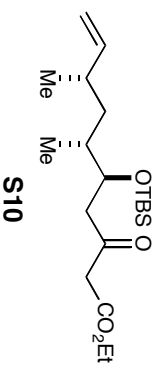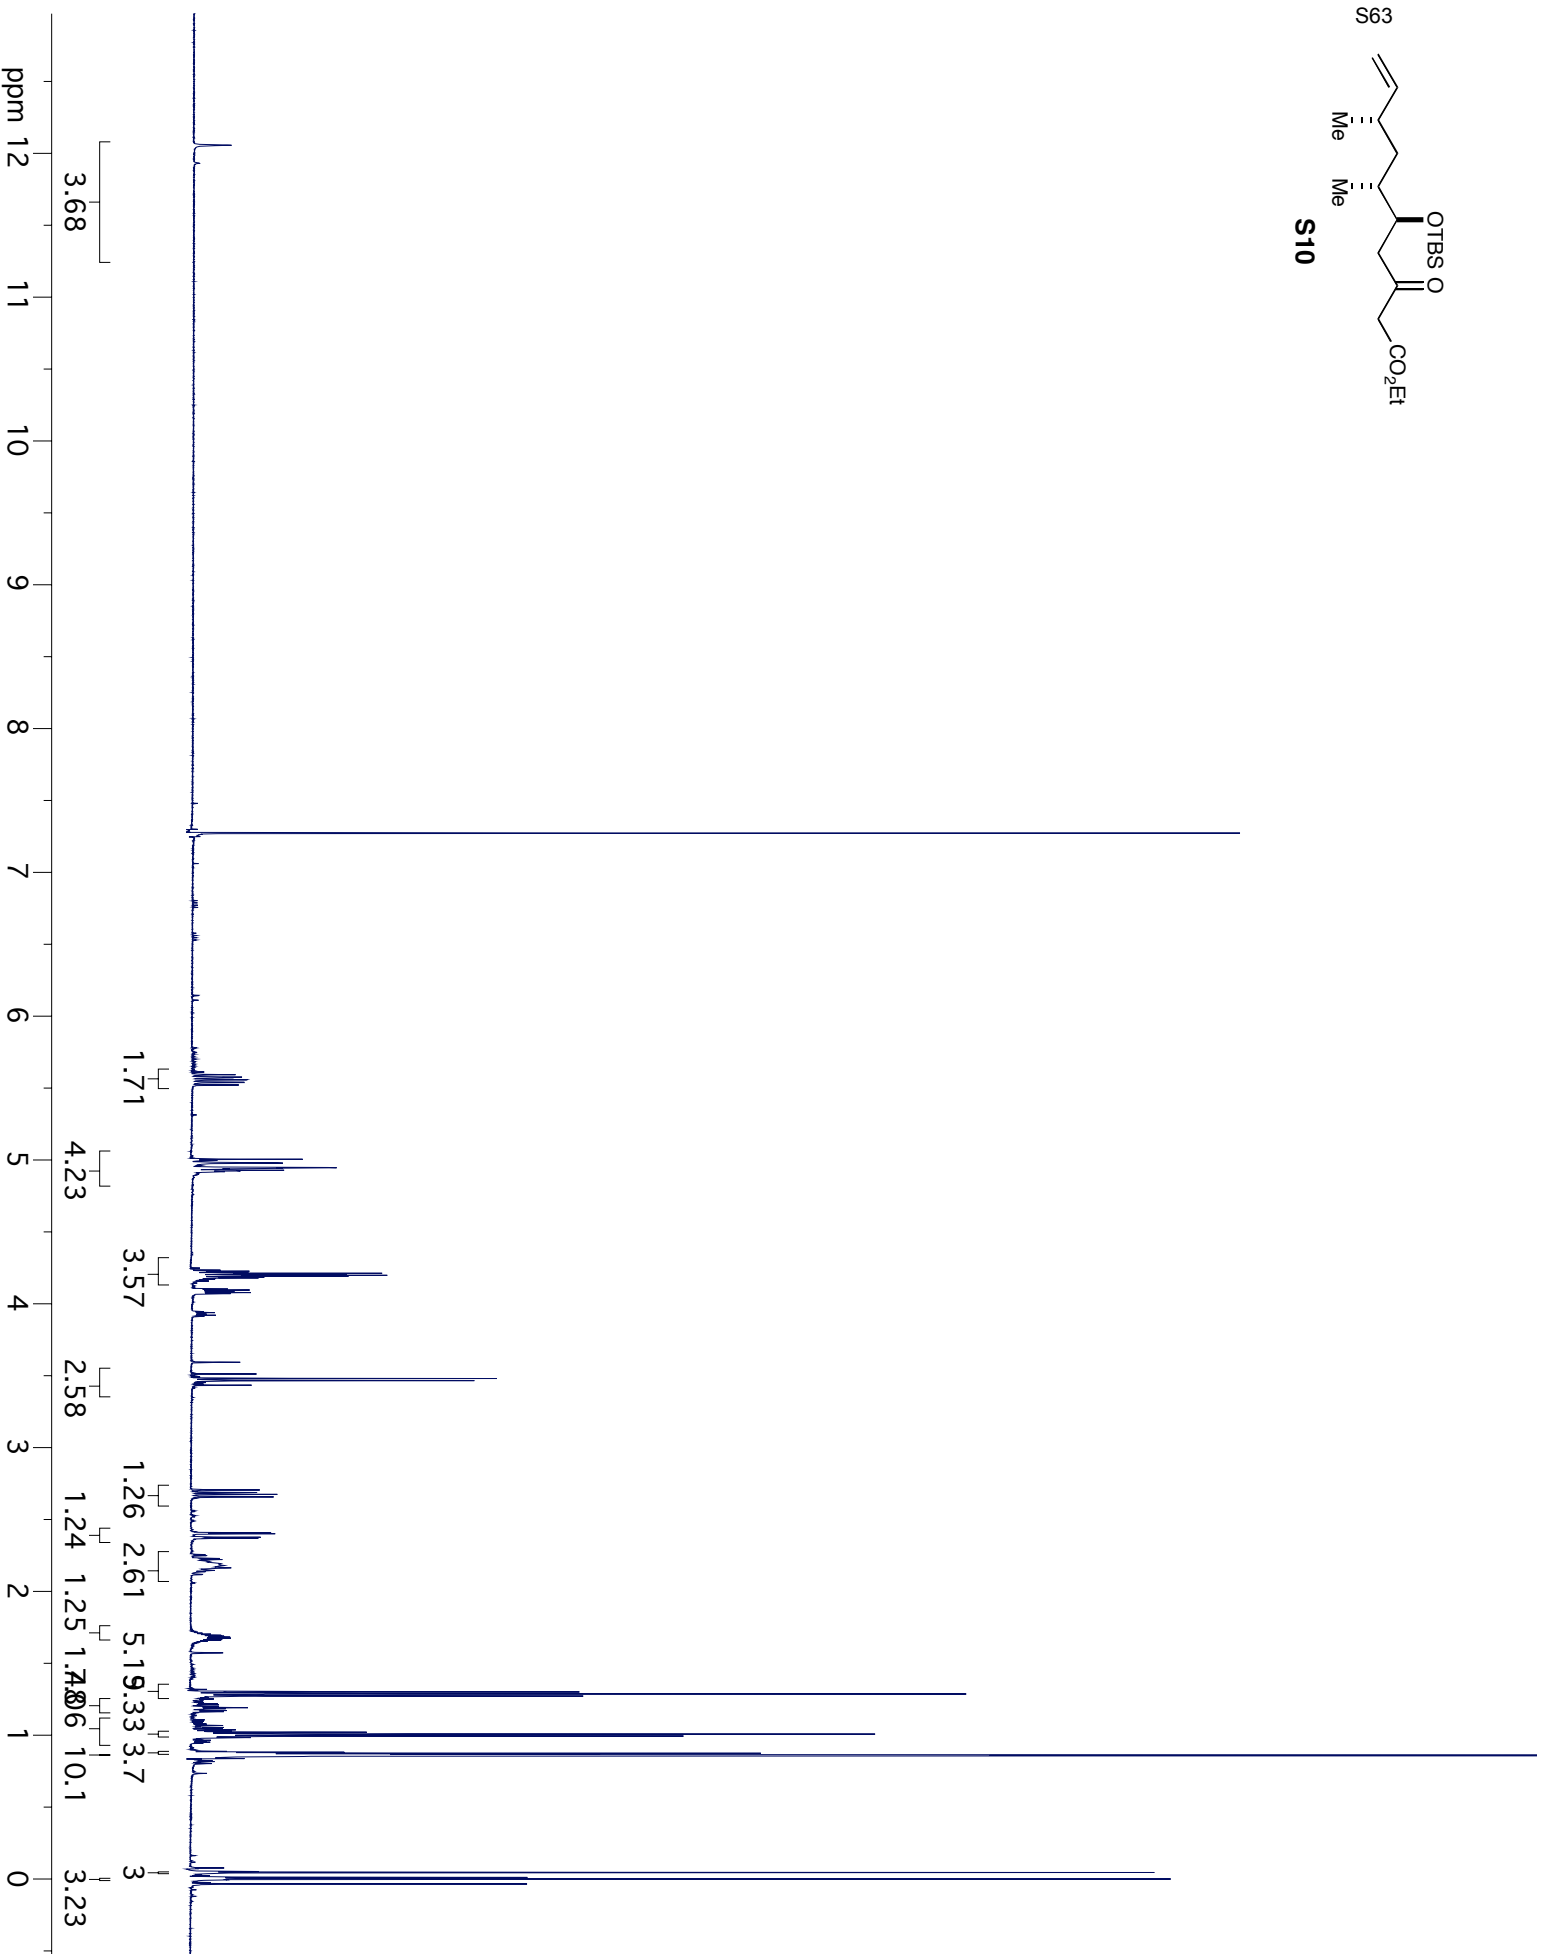



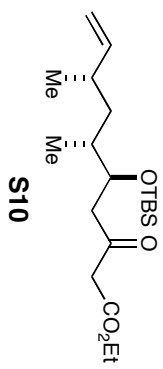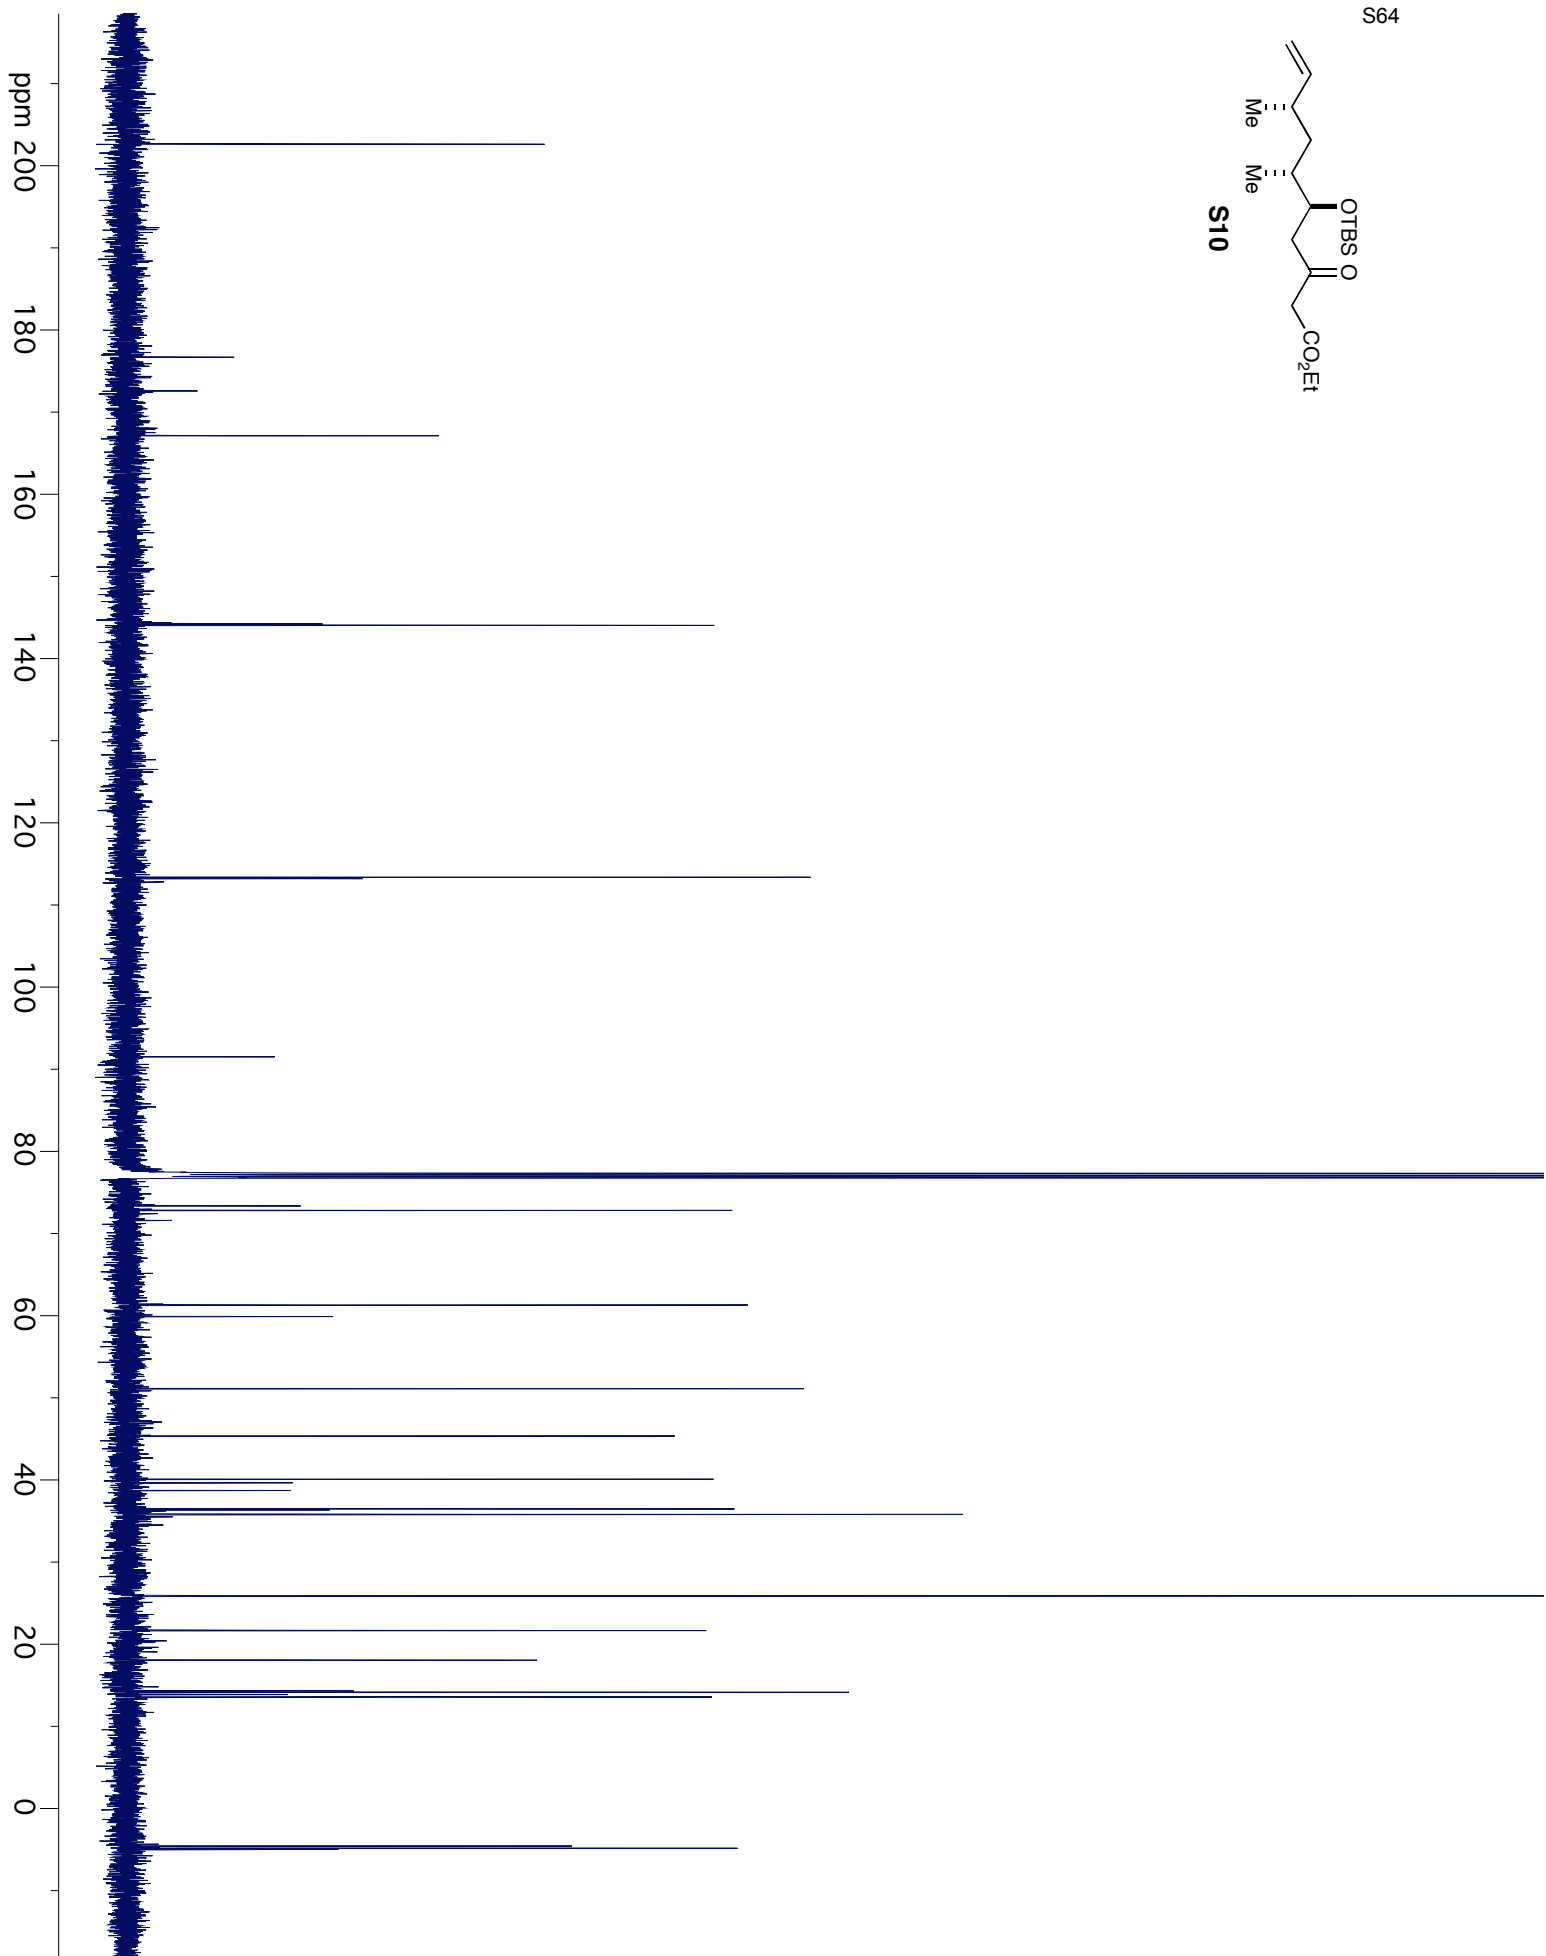

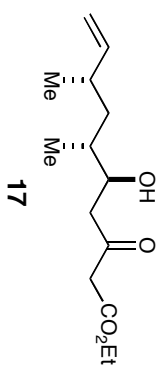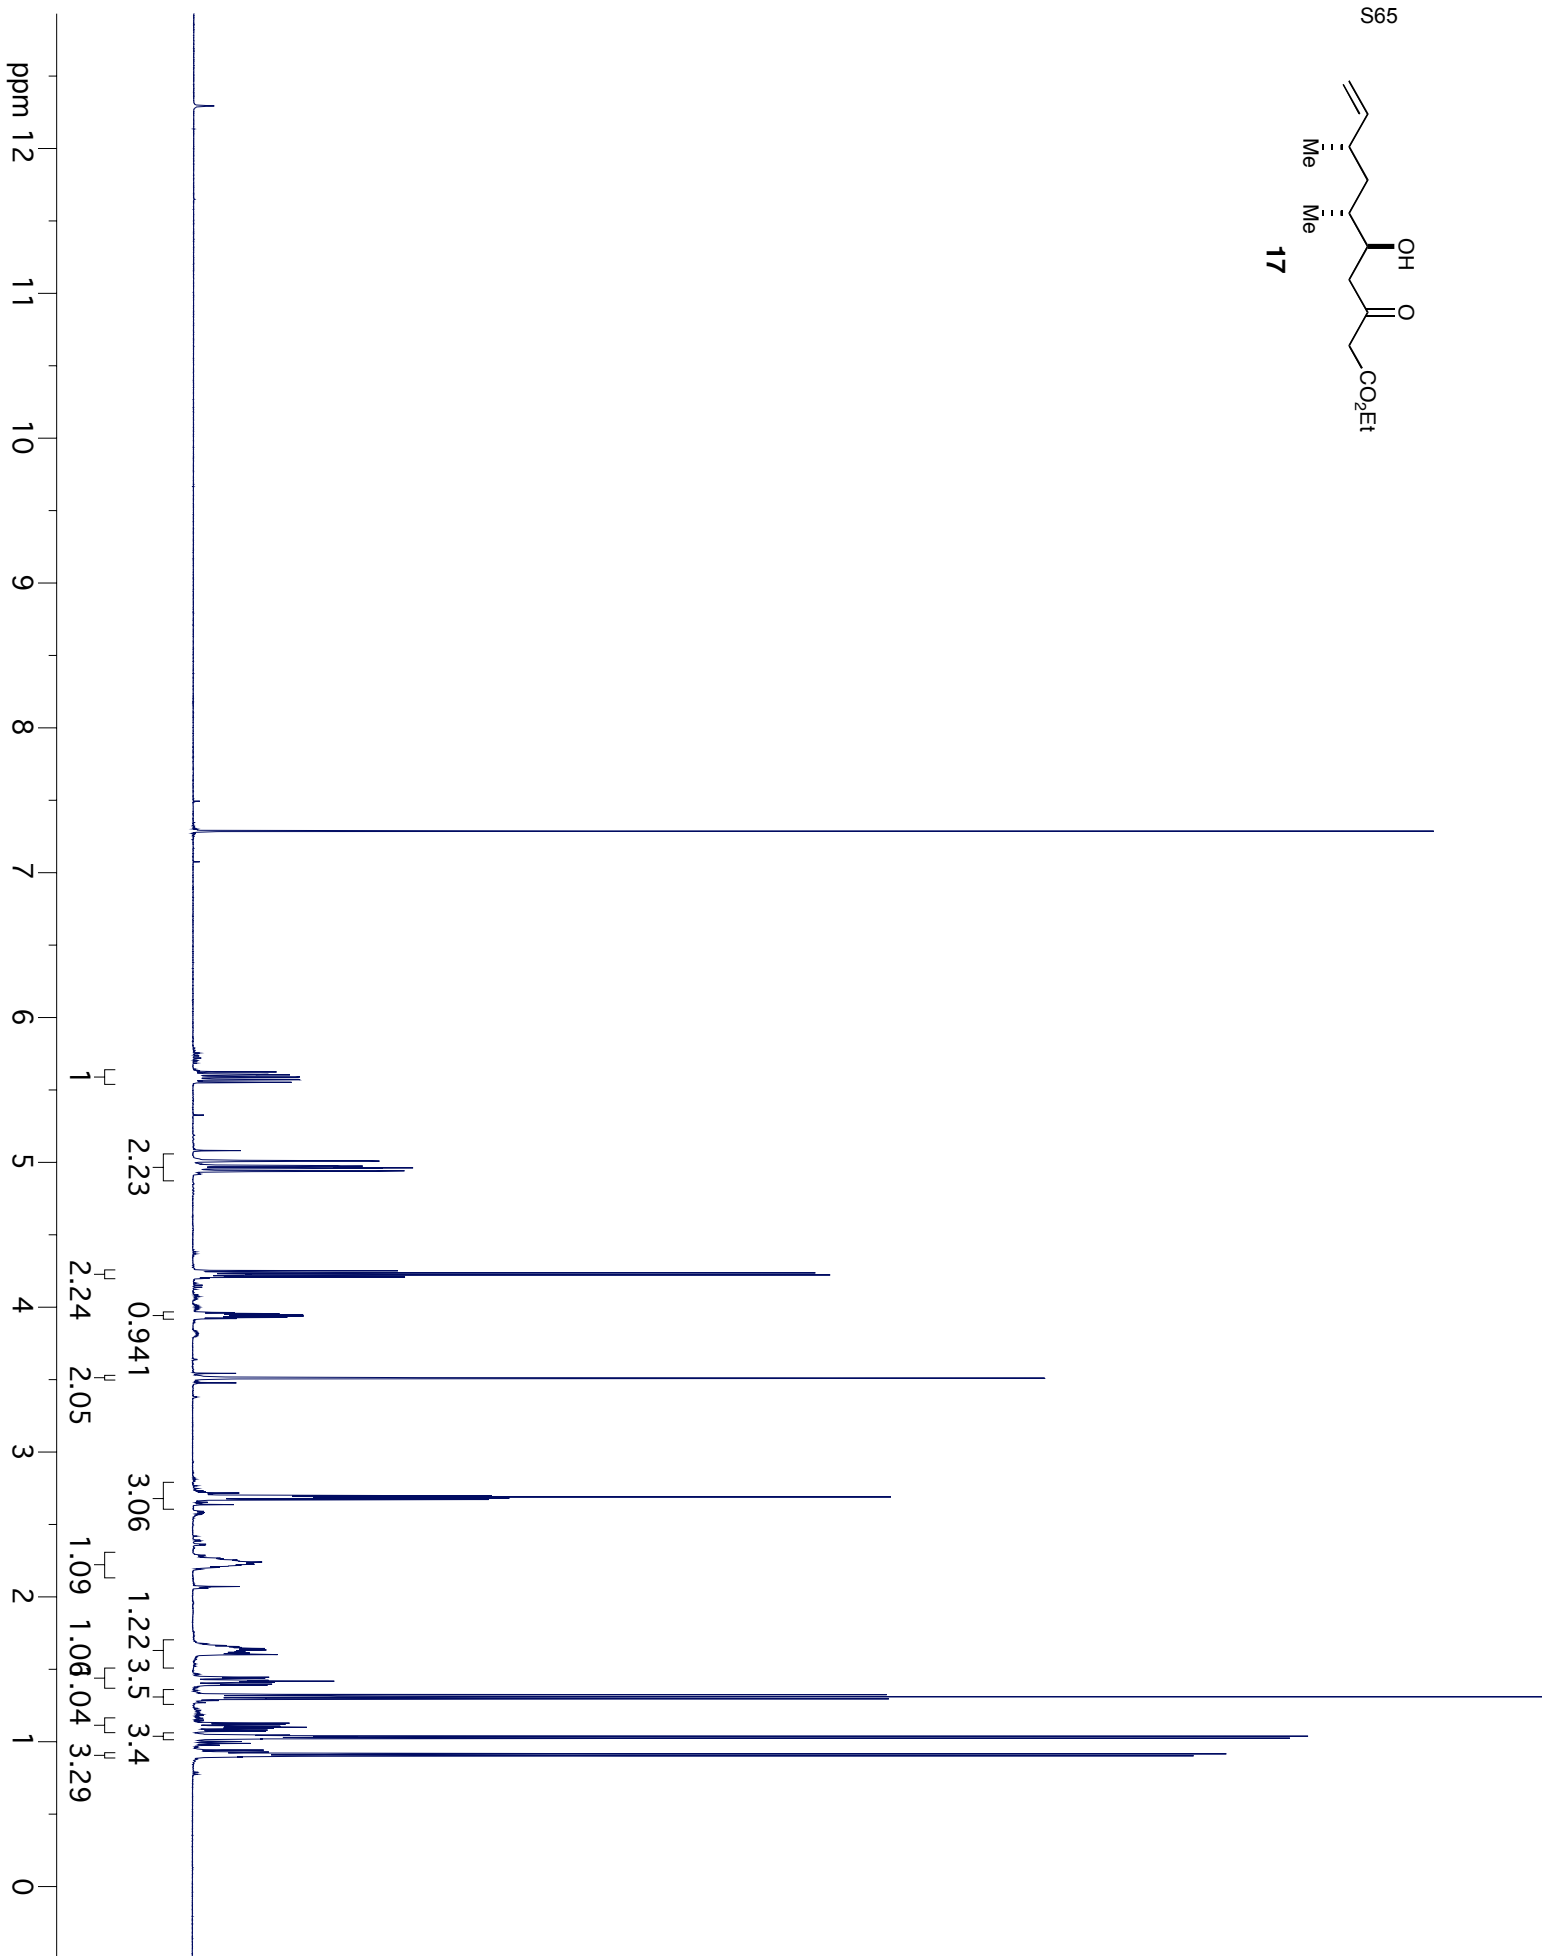

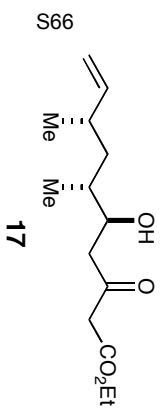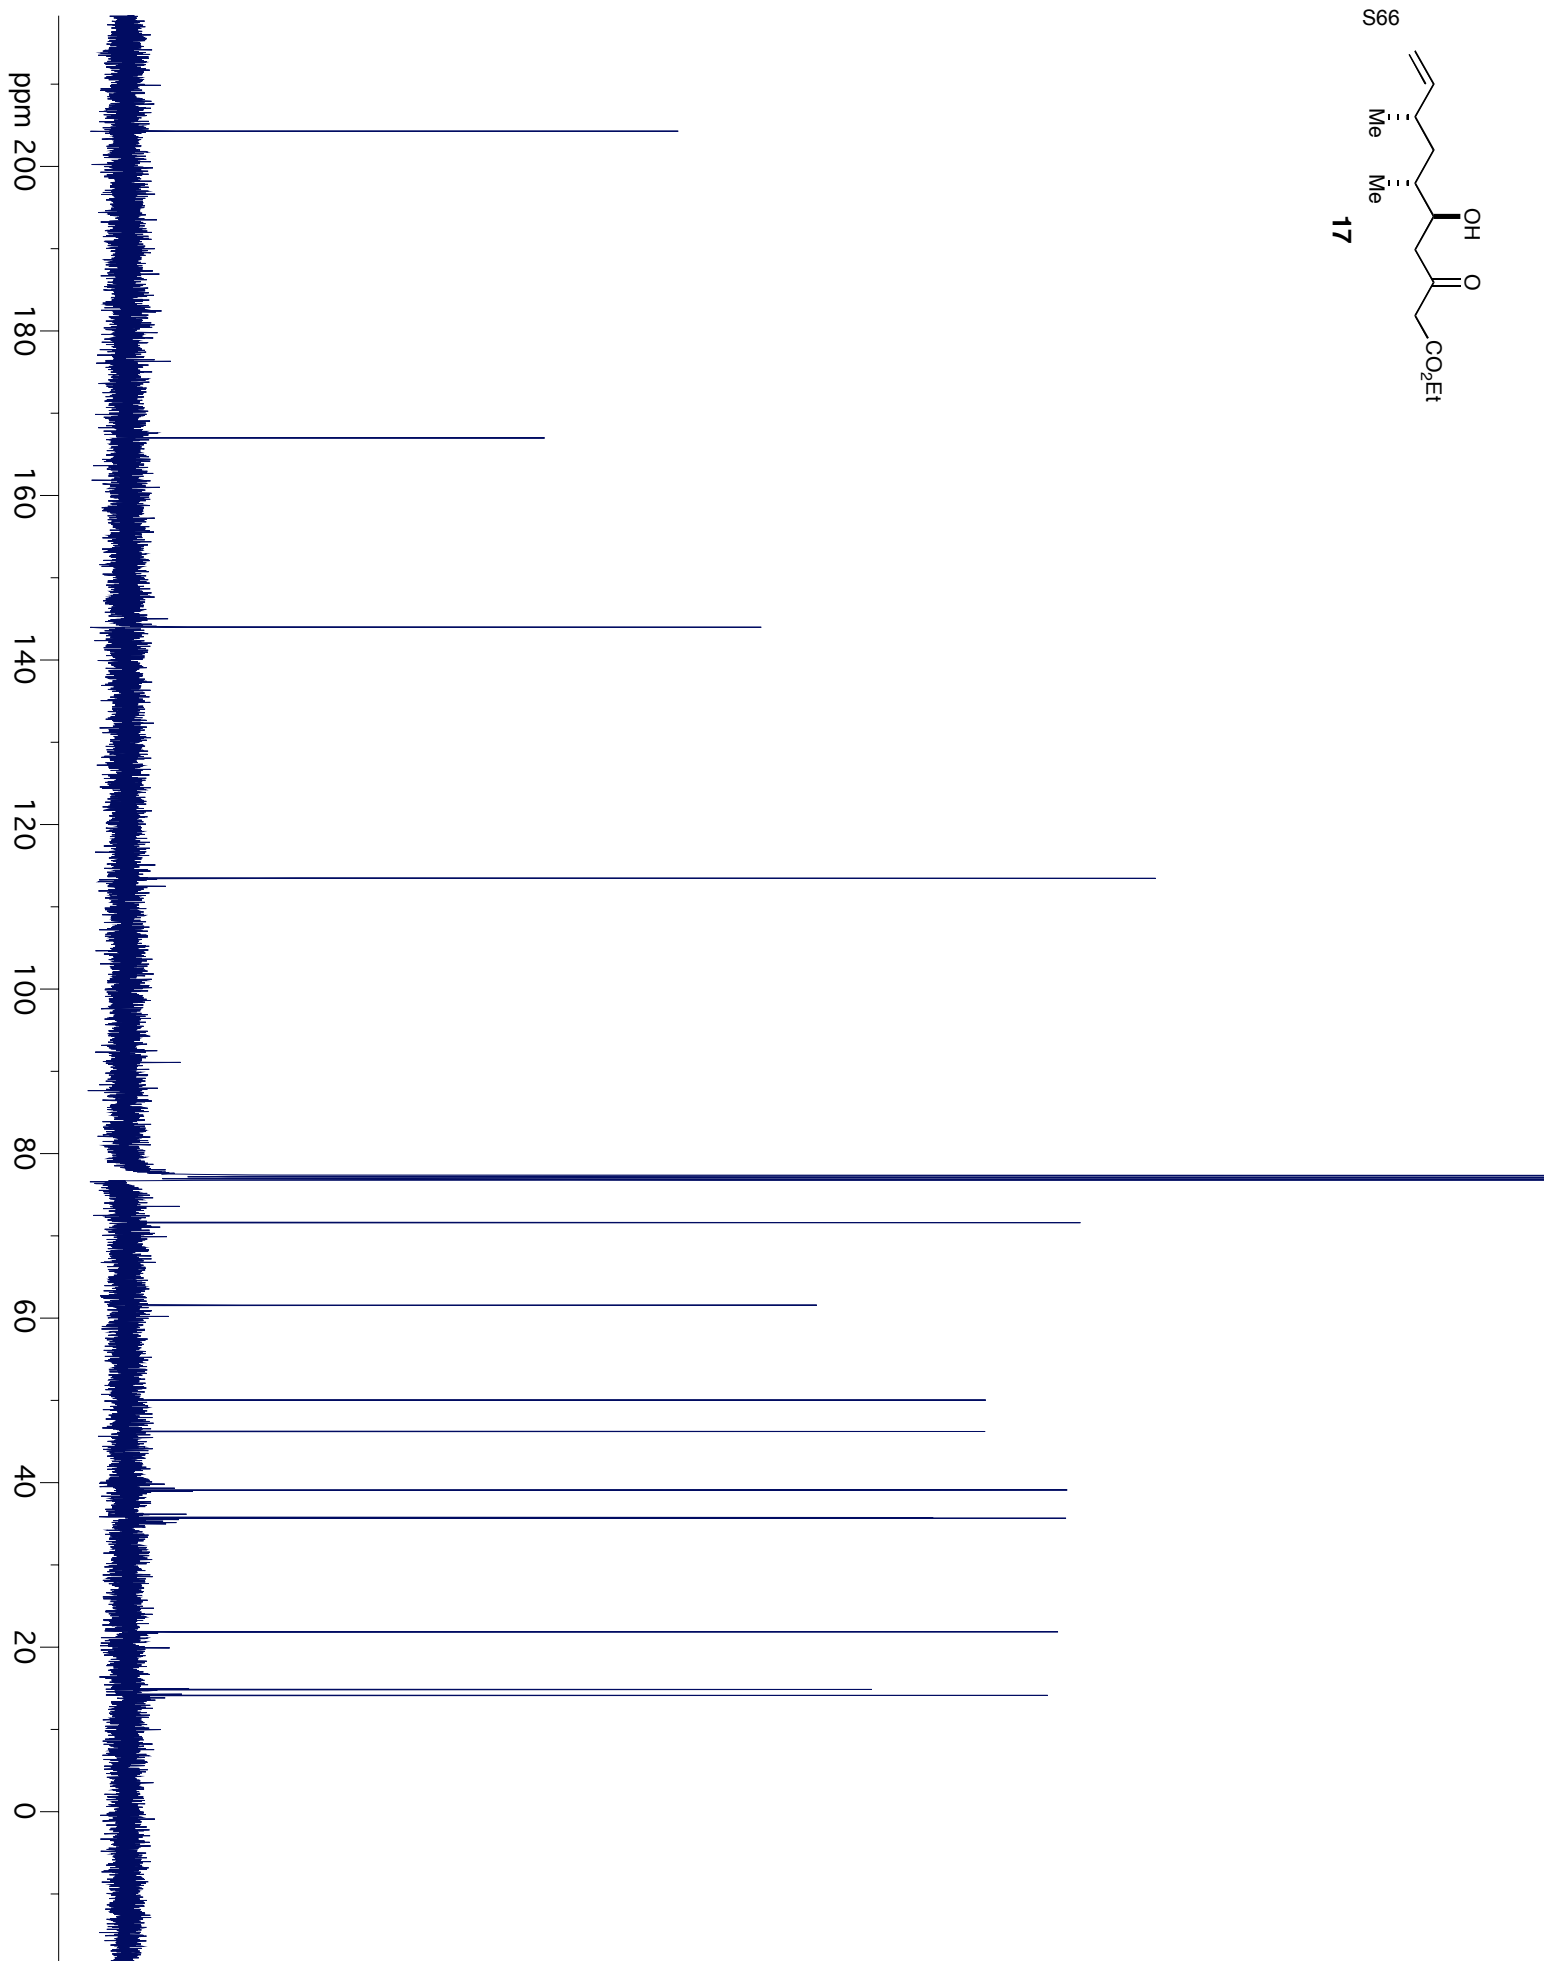

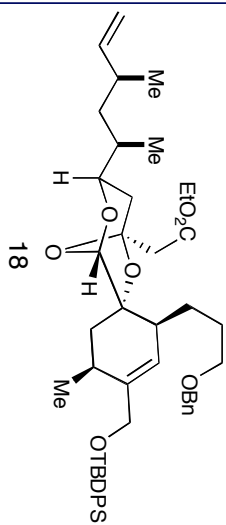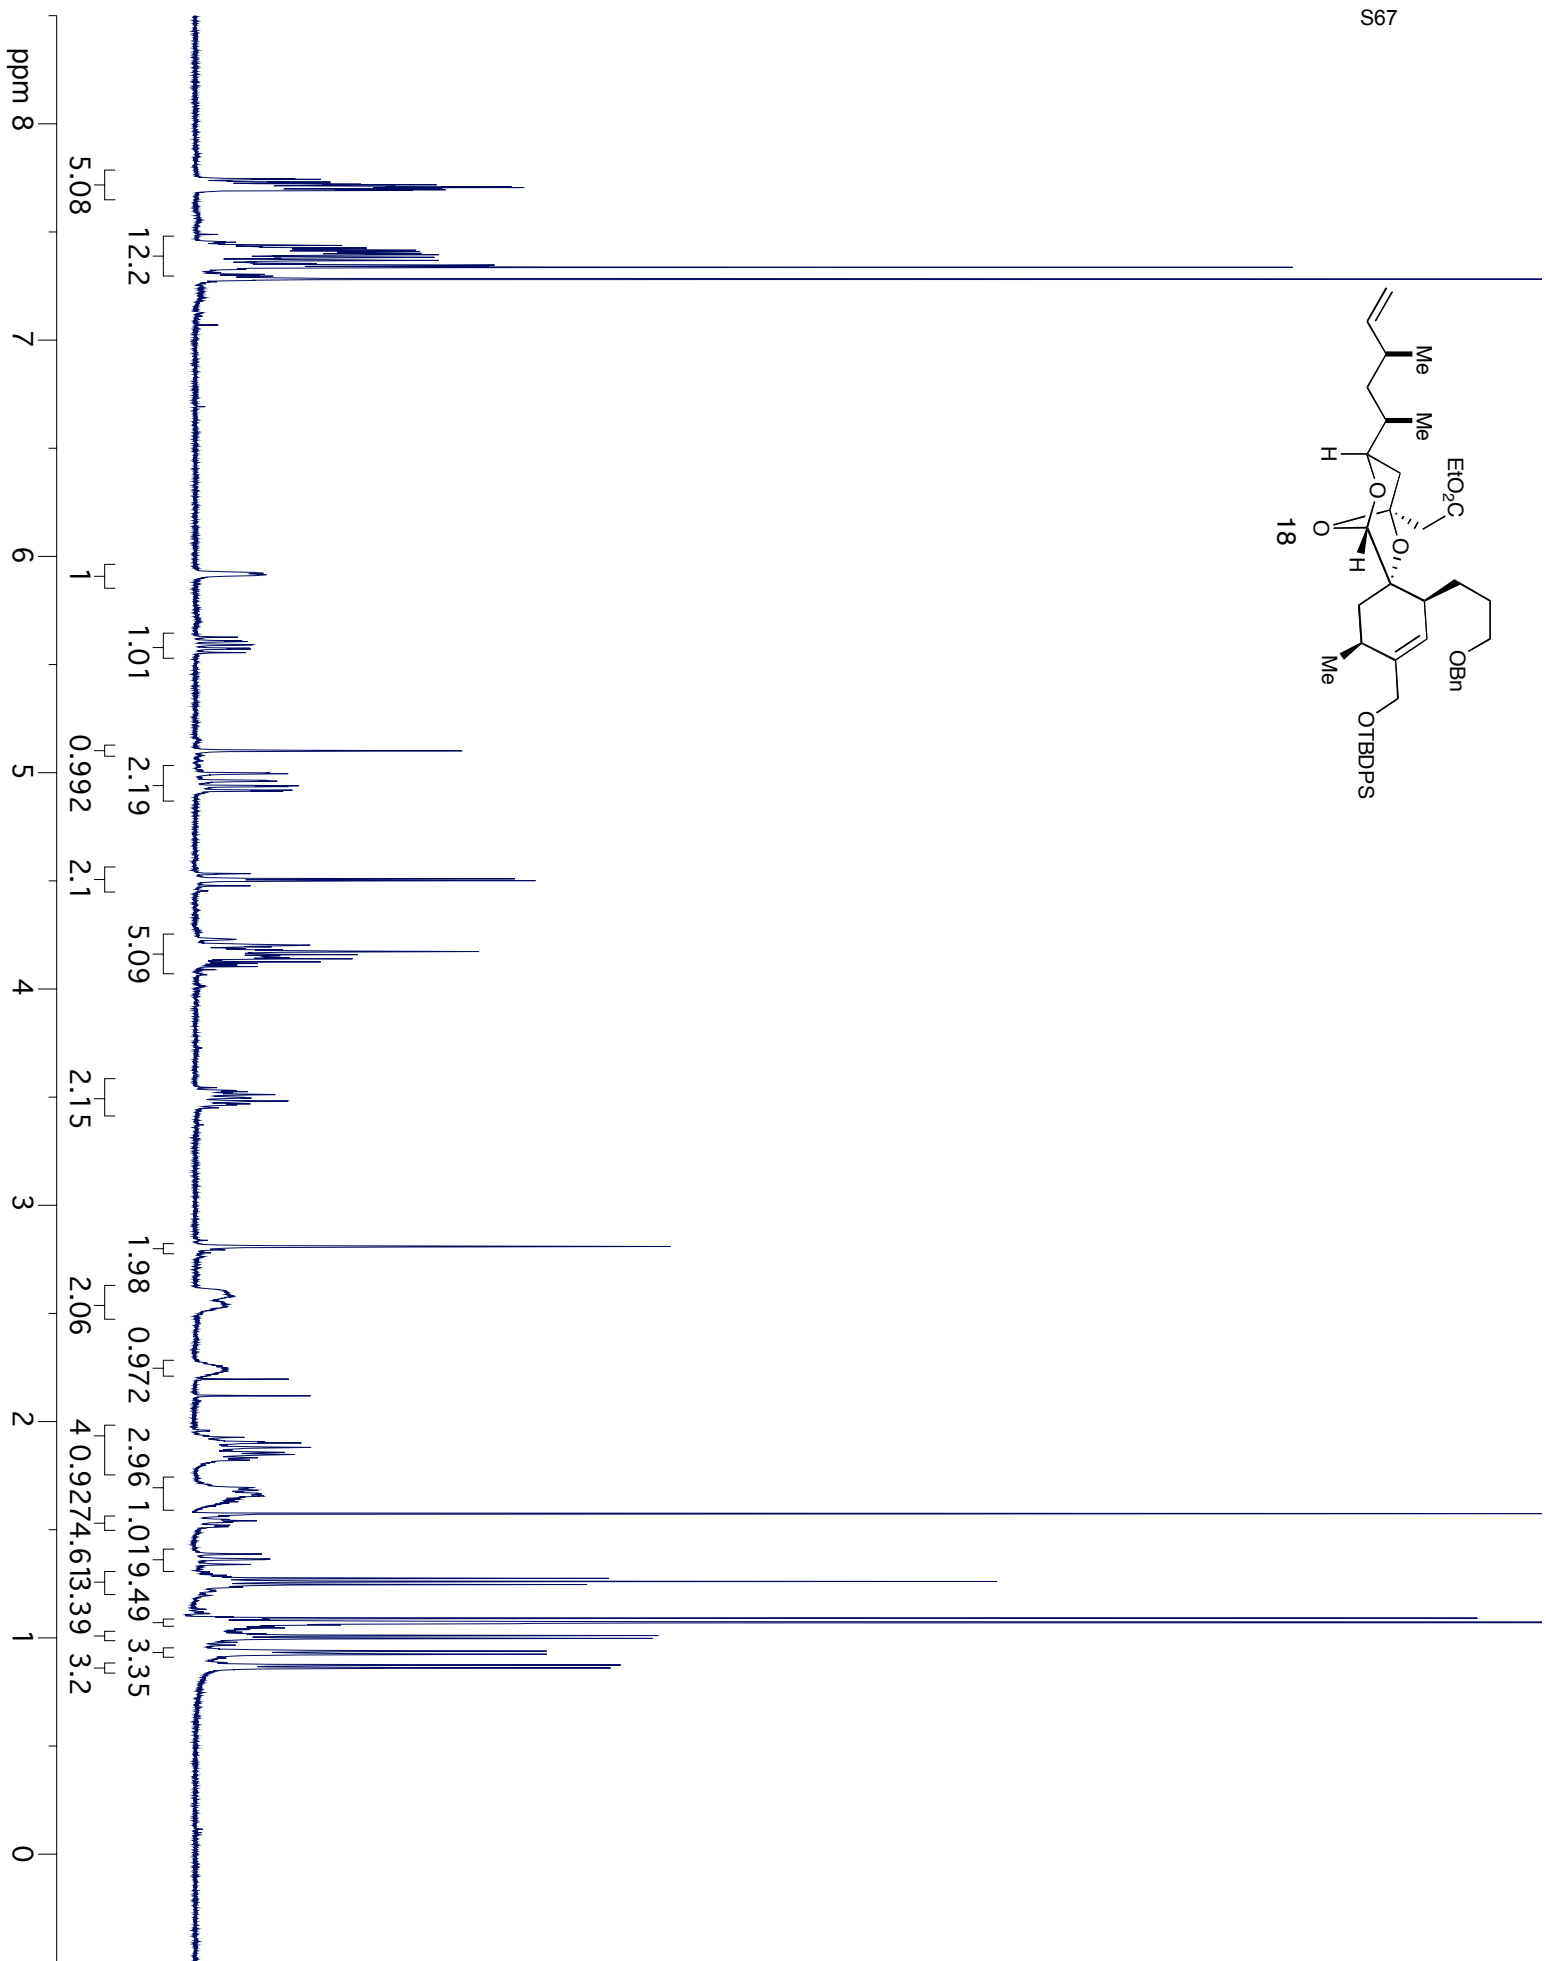

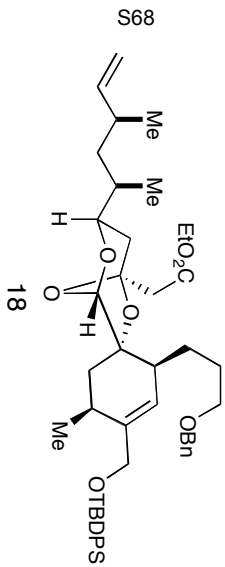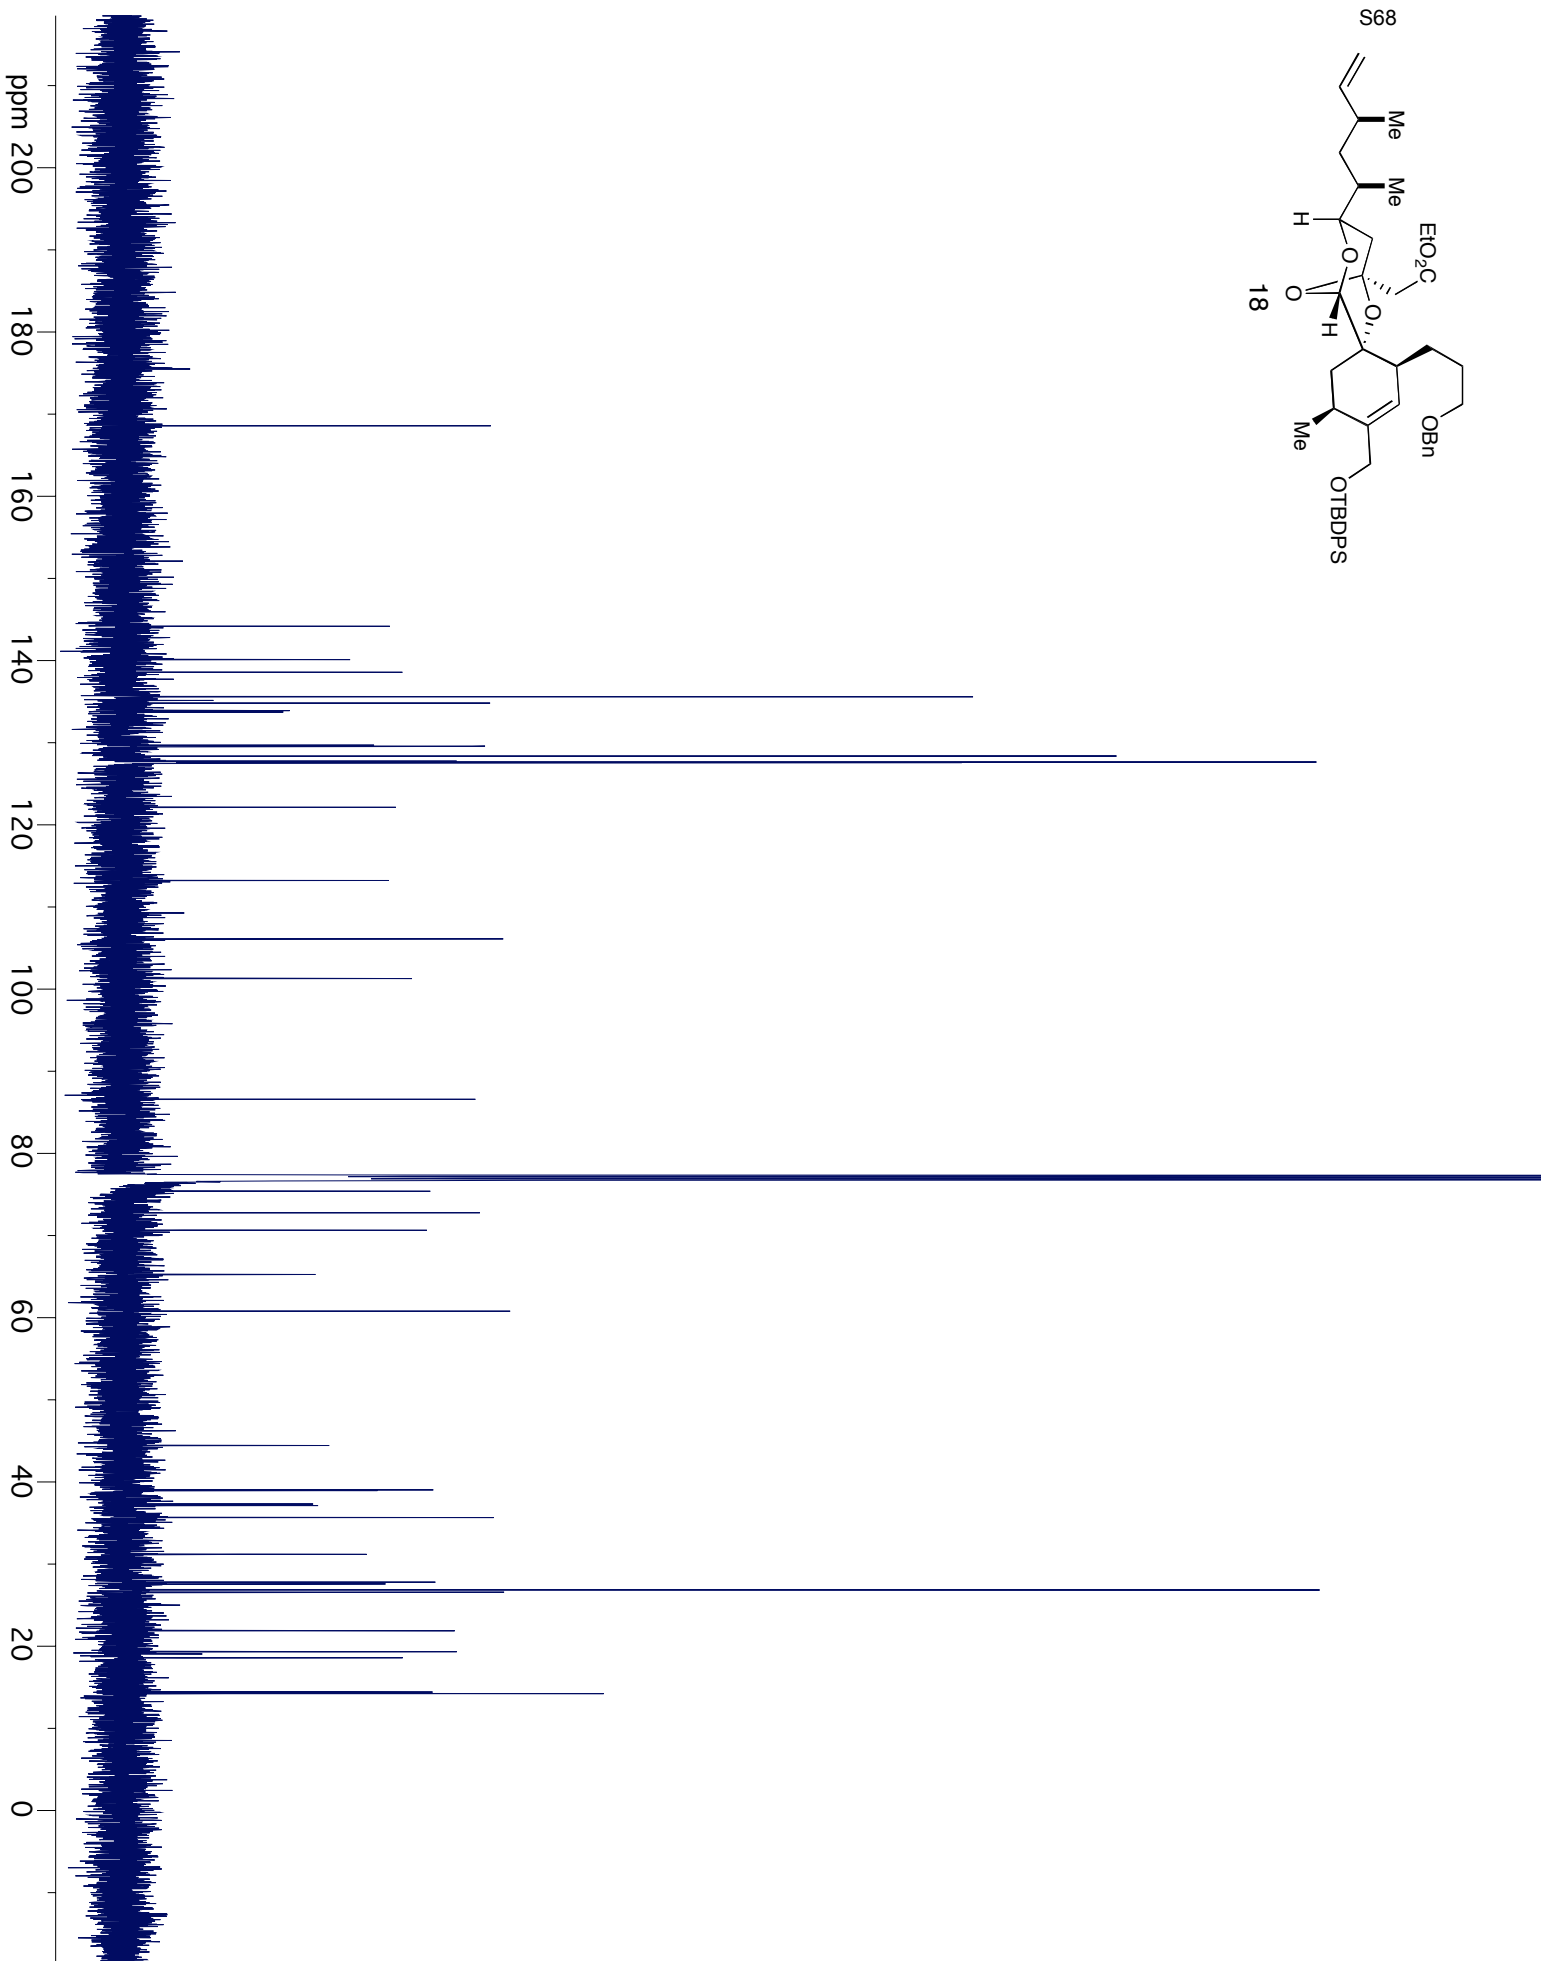





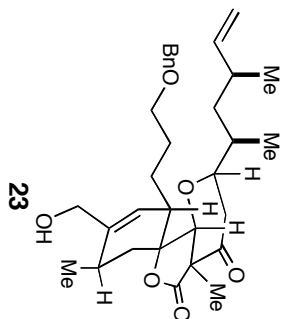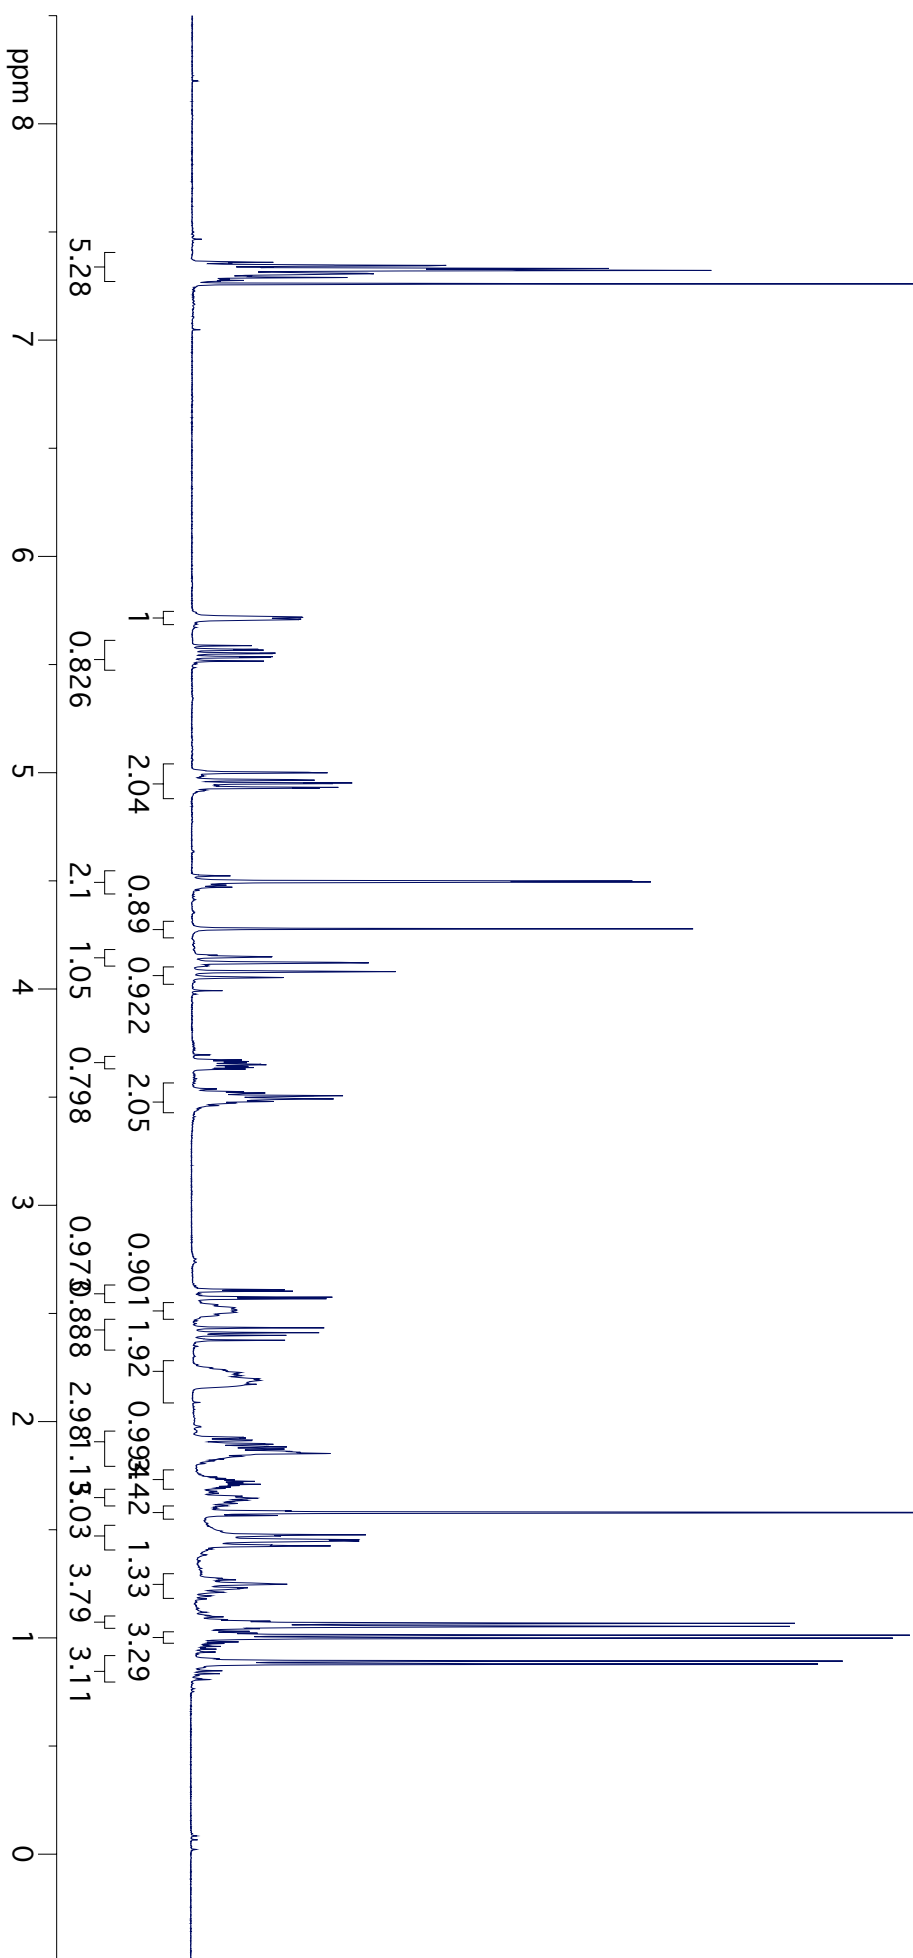



S72

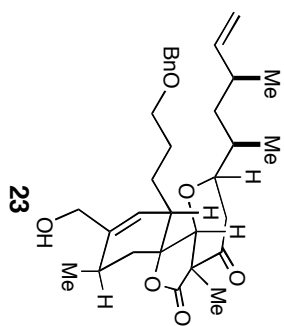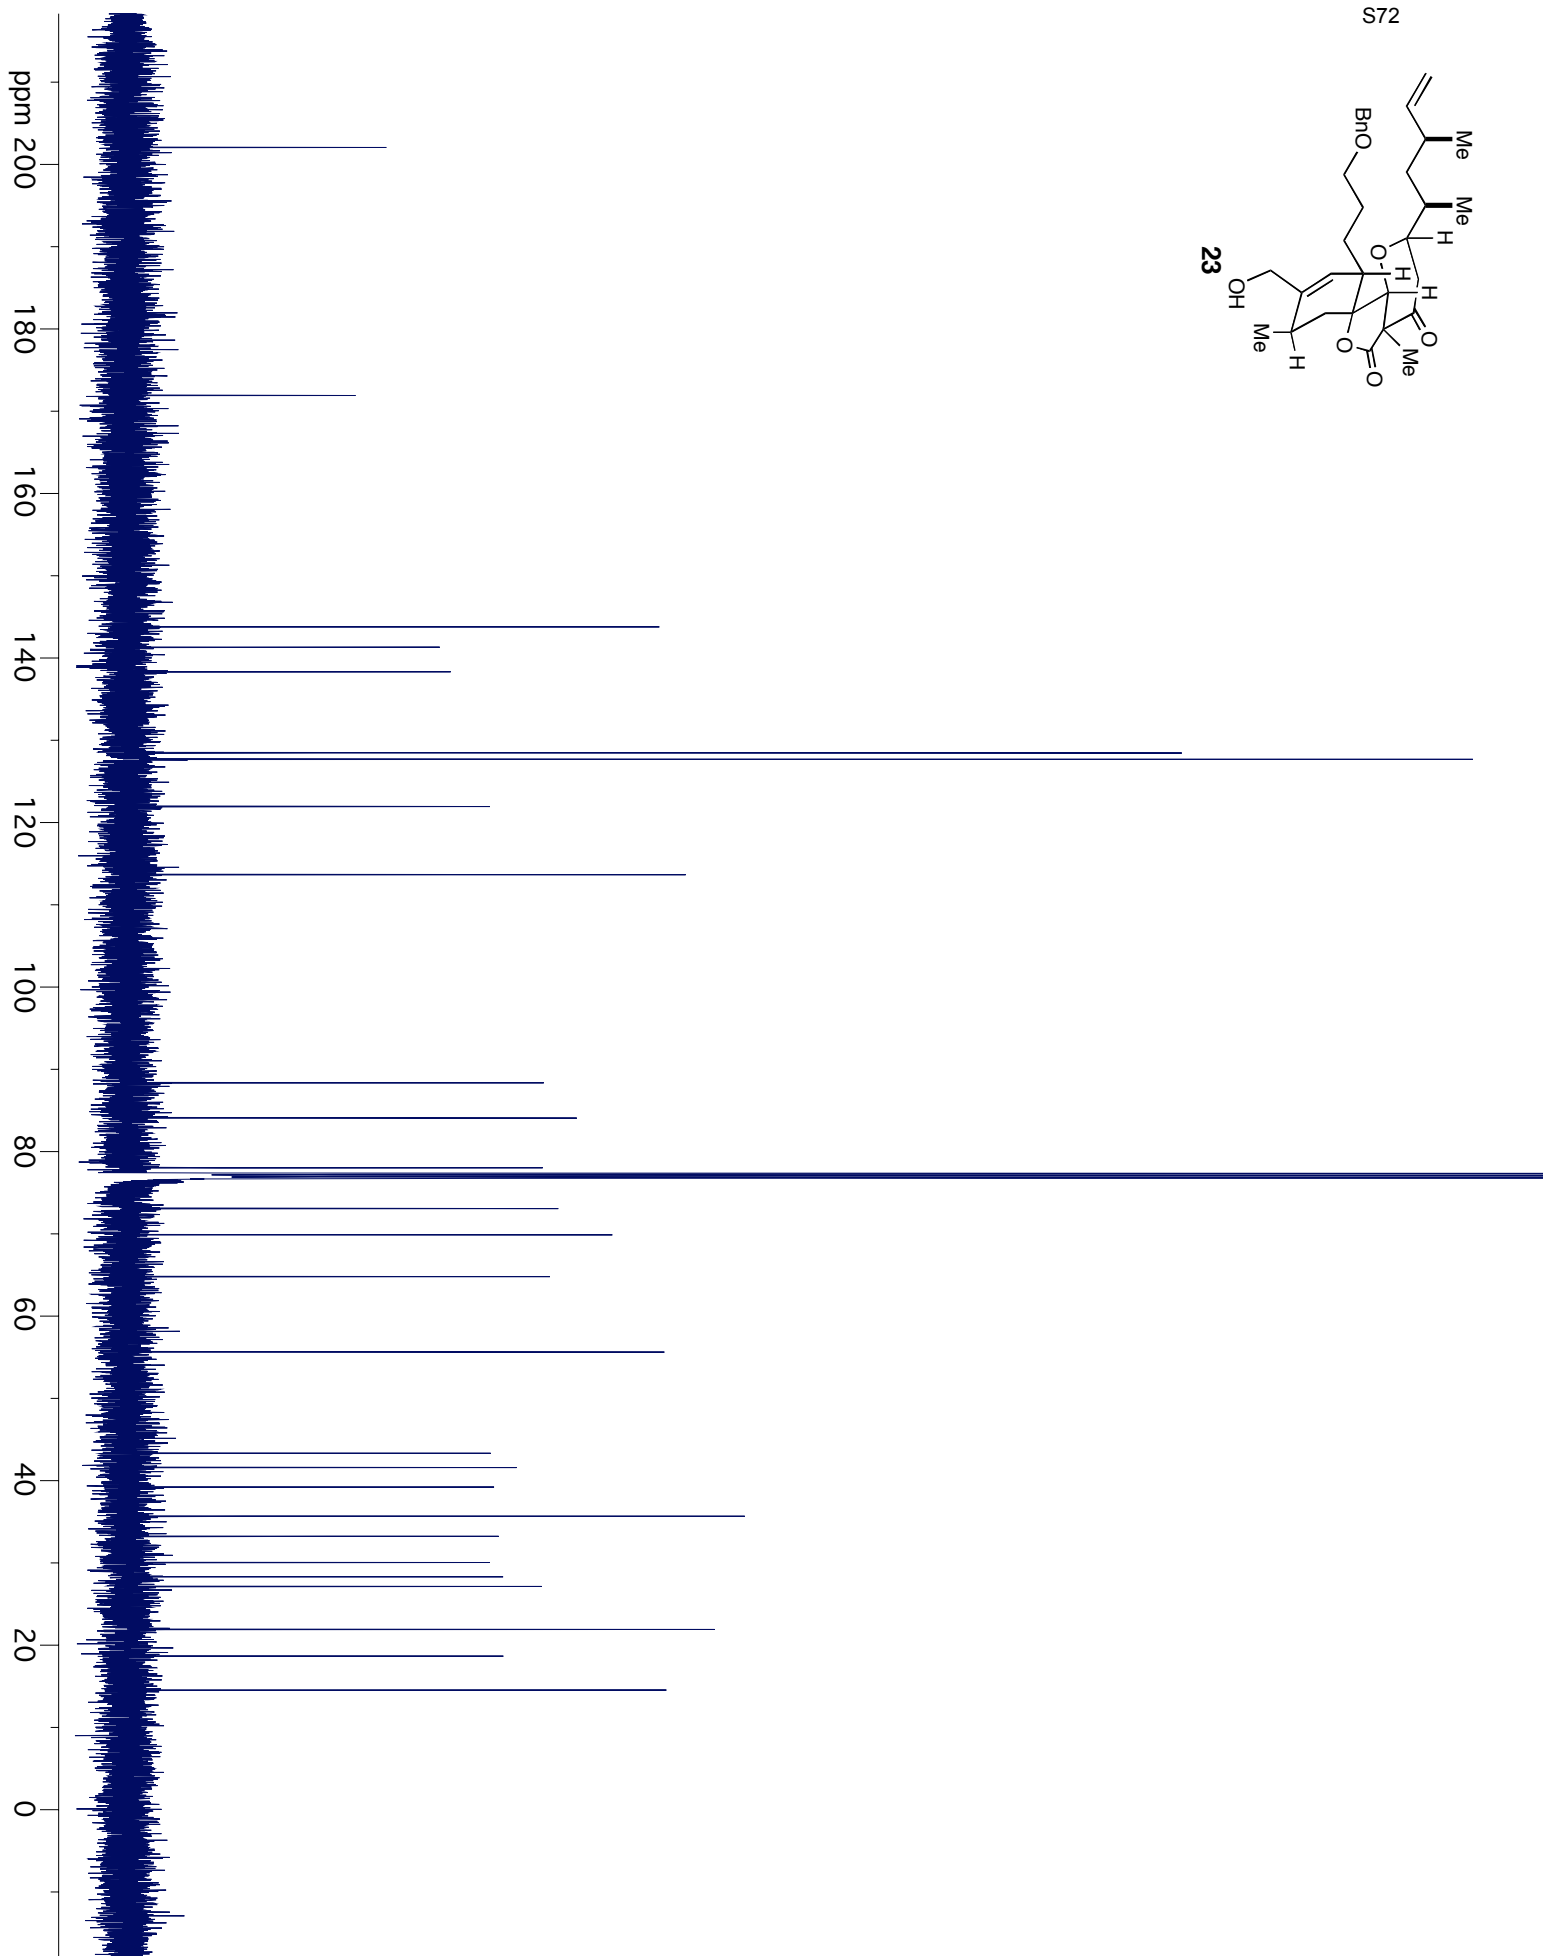





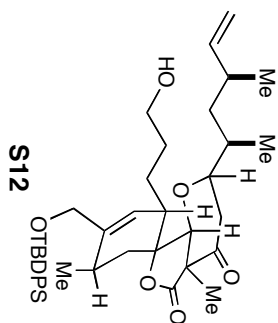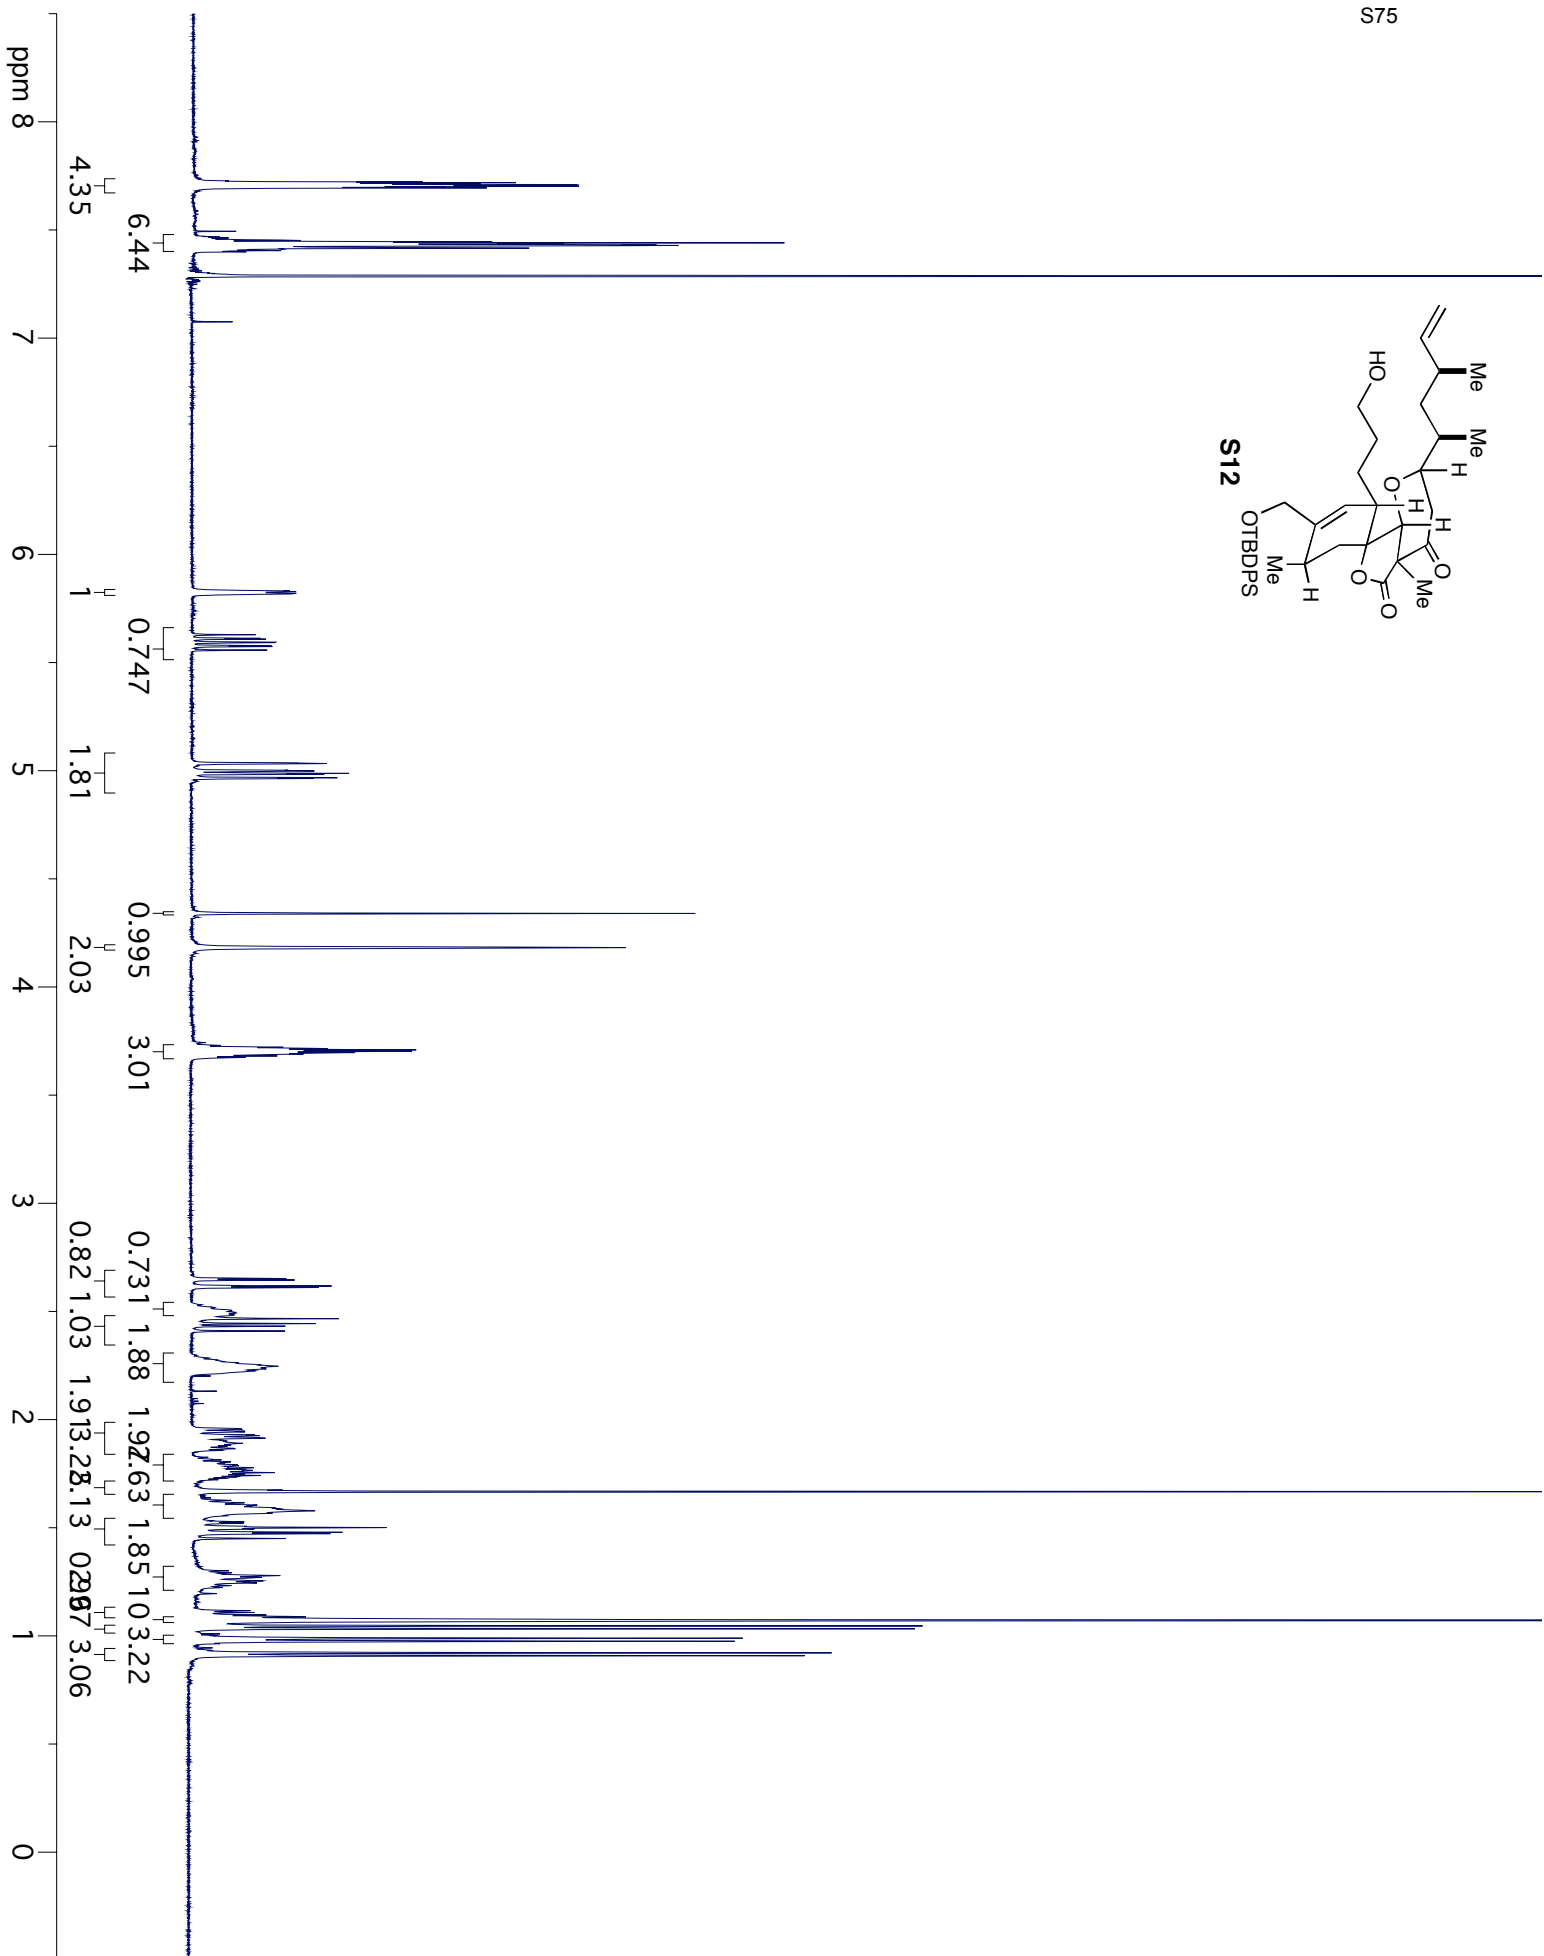

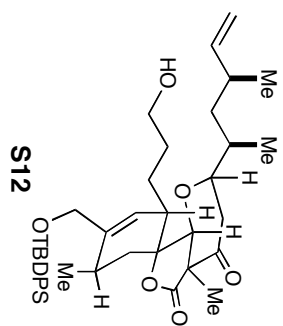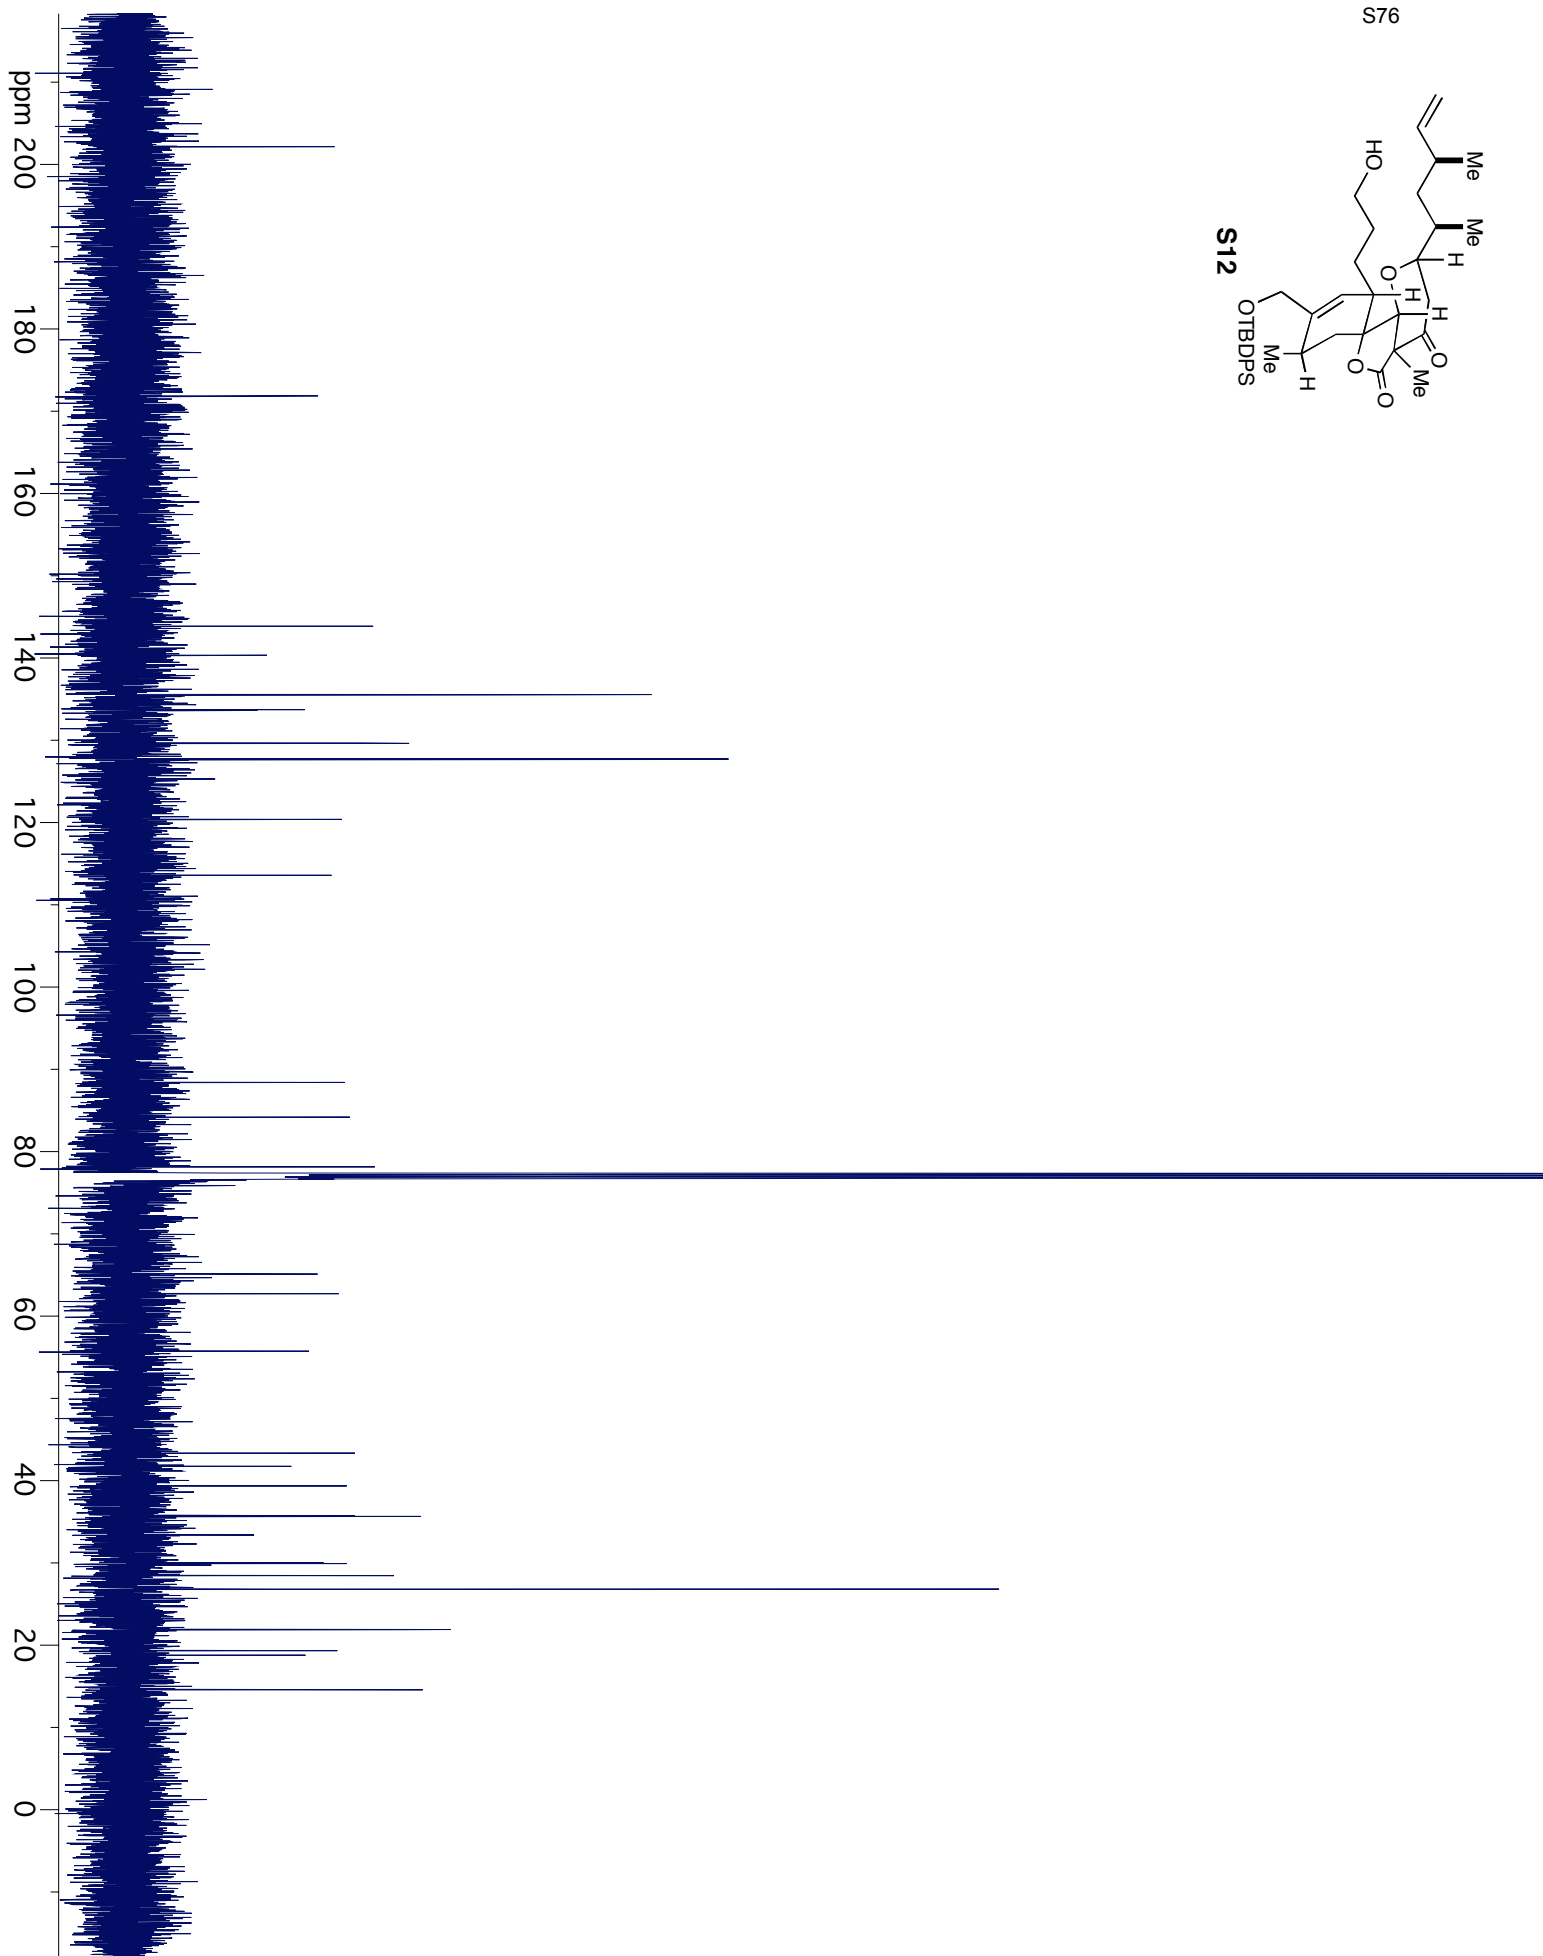



S78

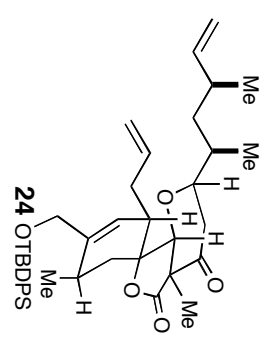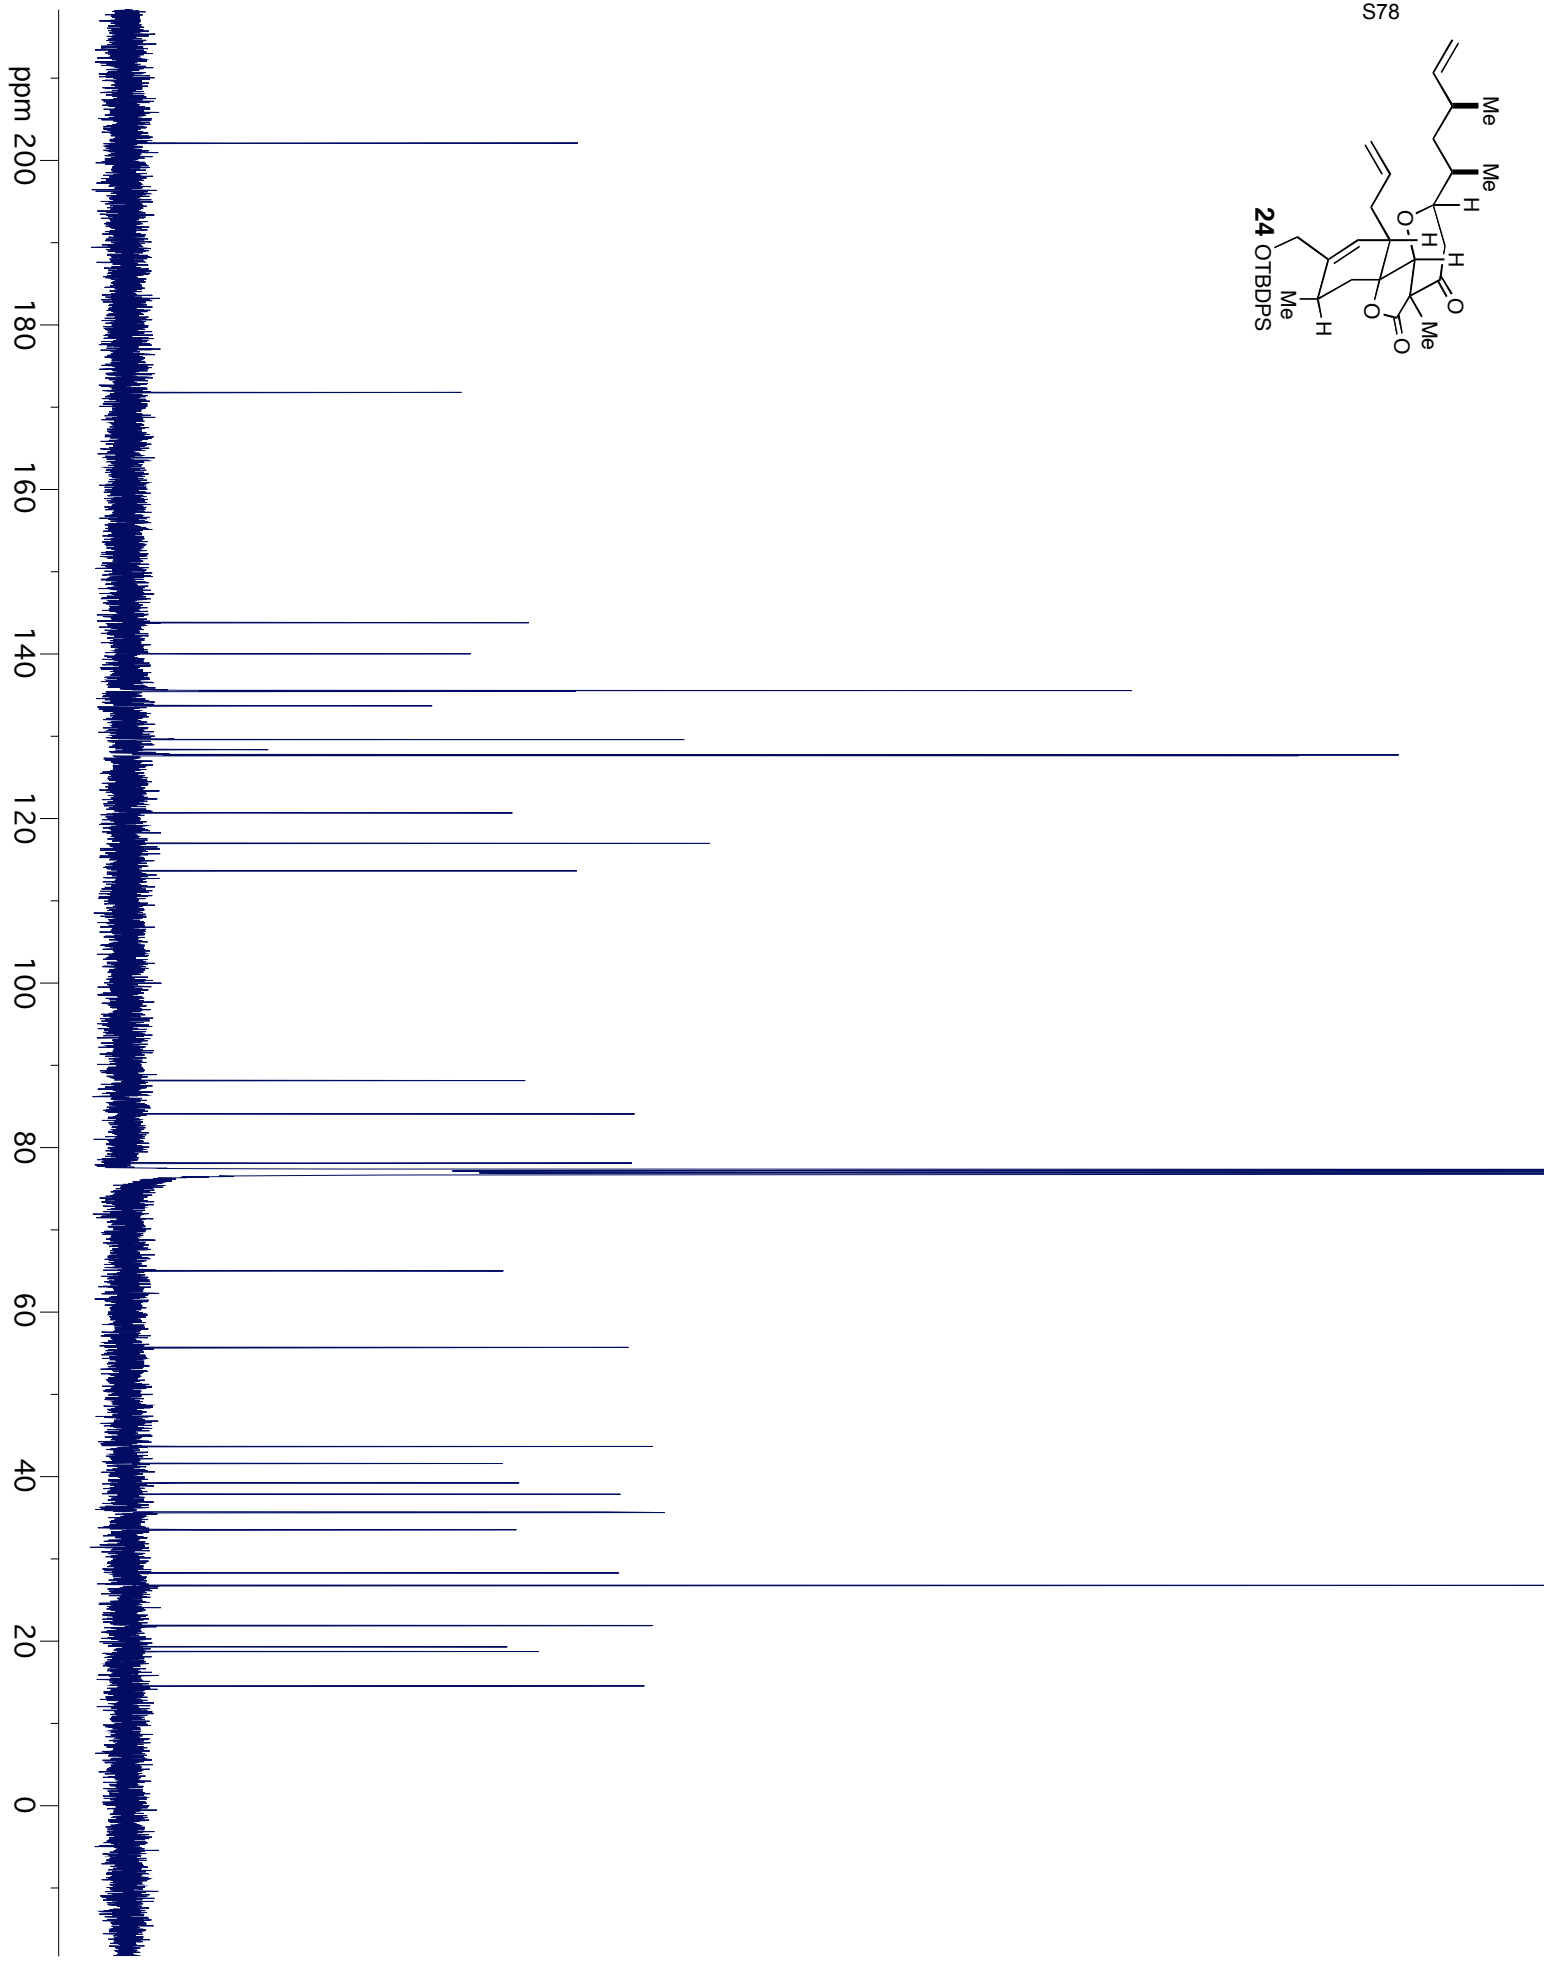

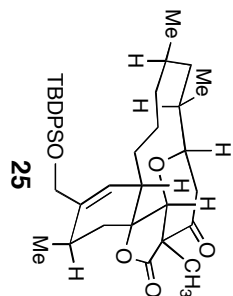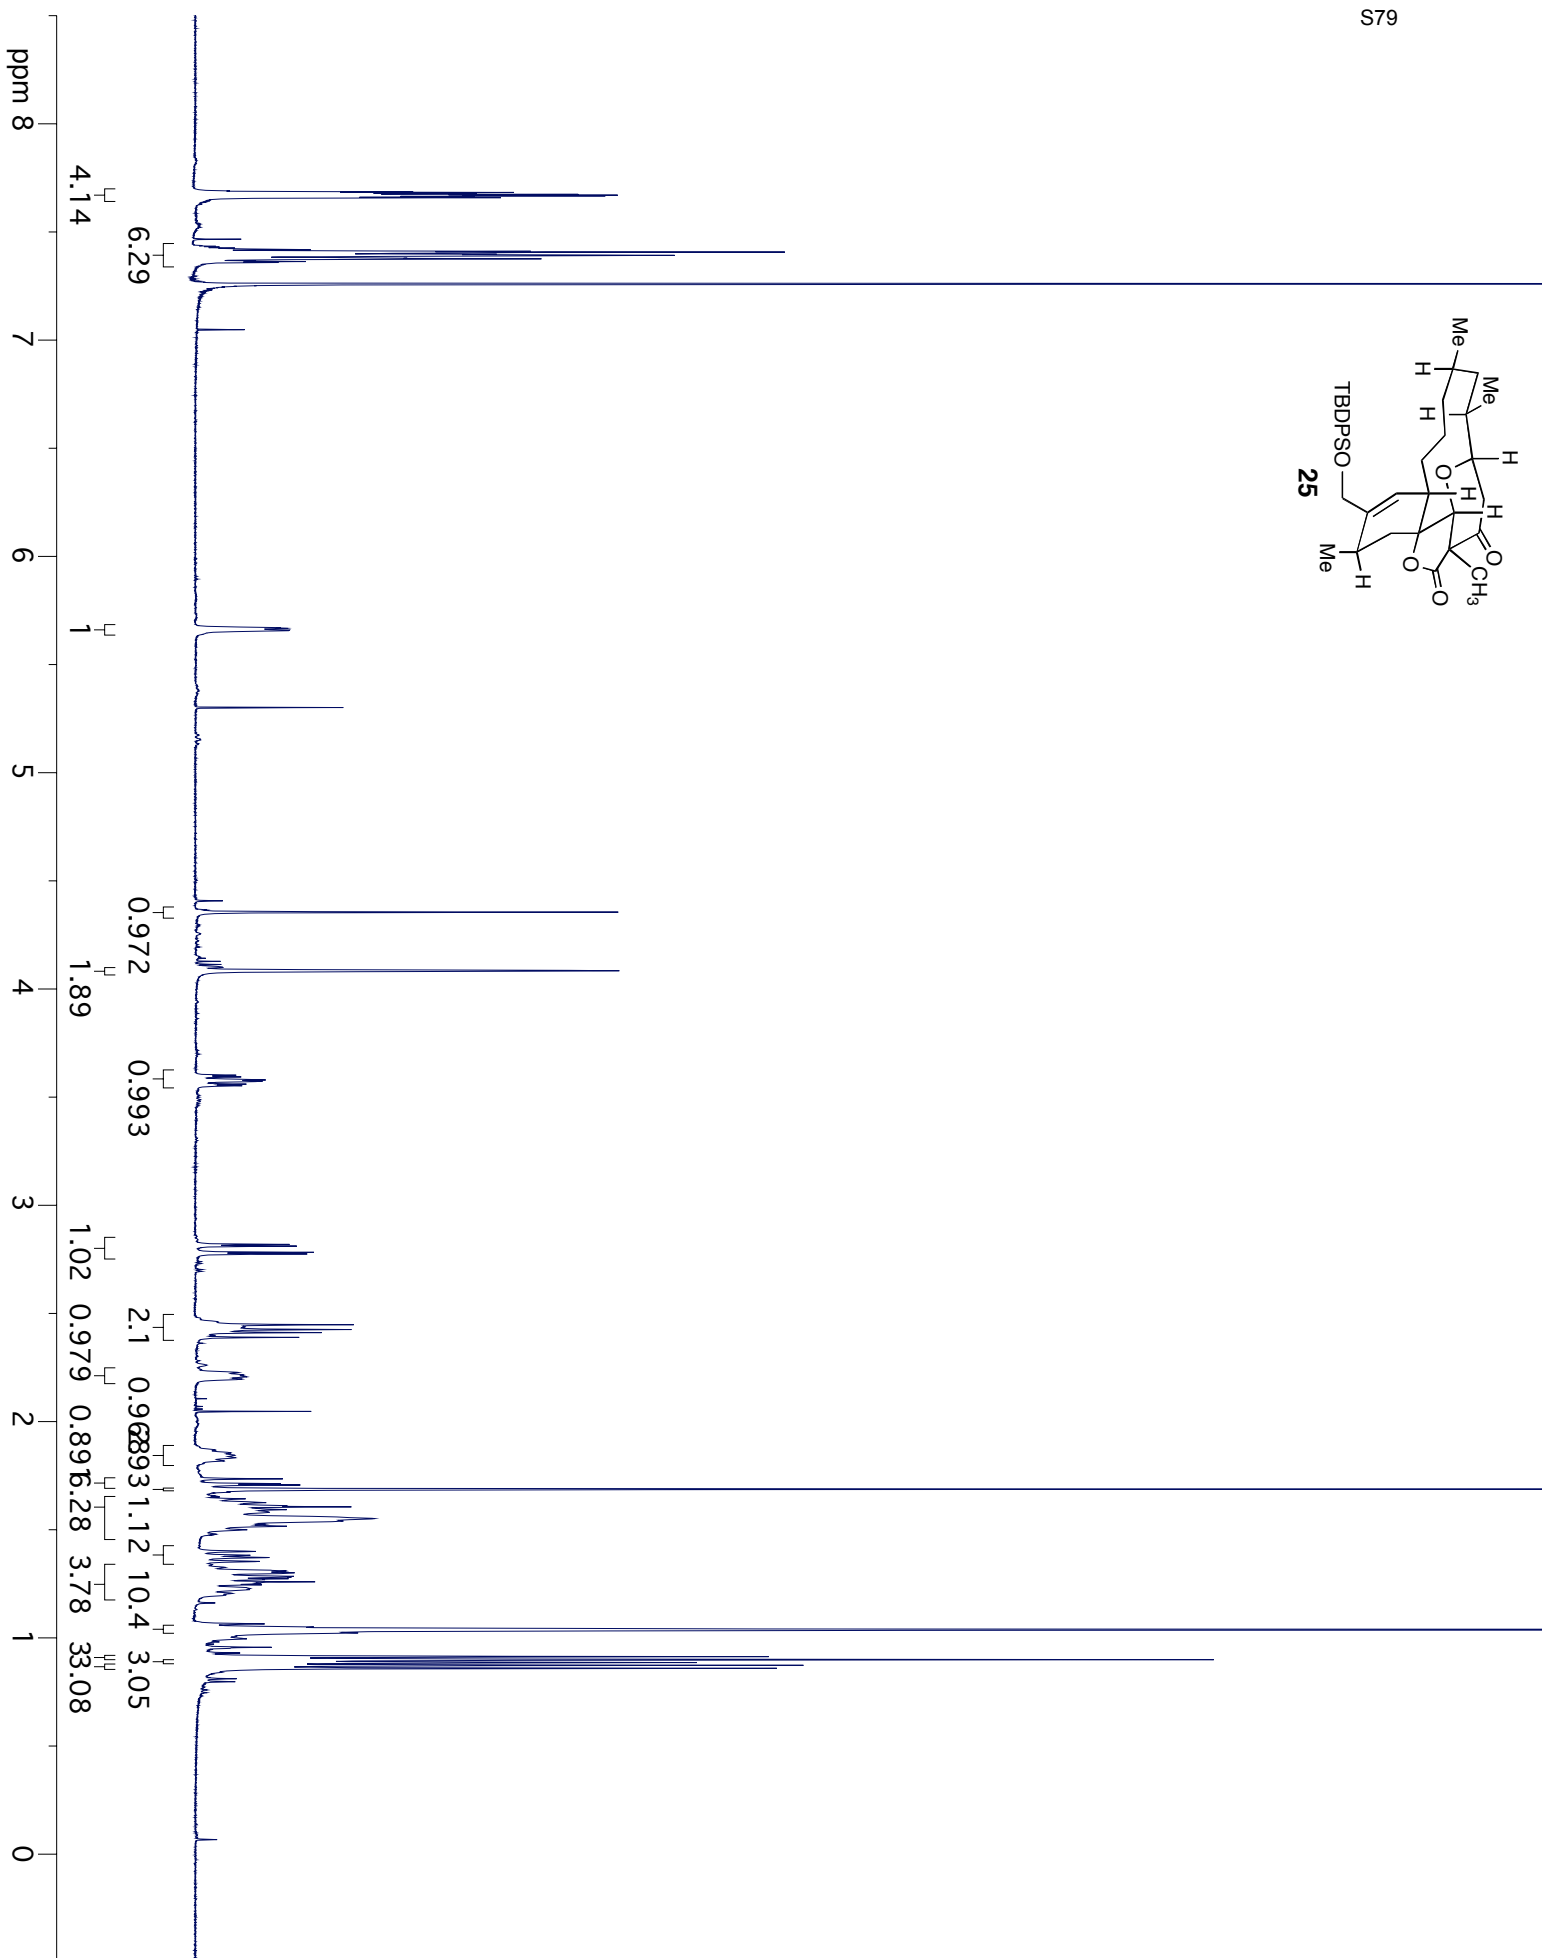



S80

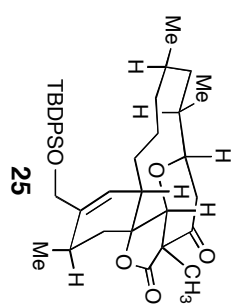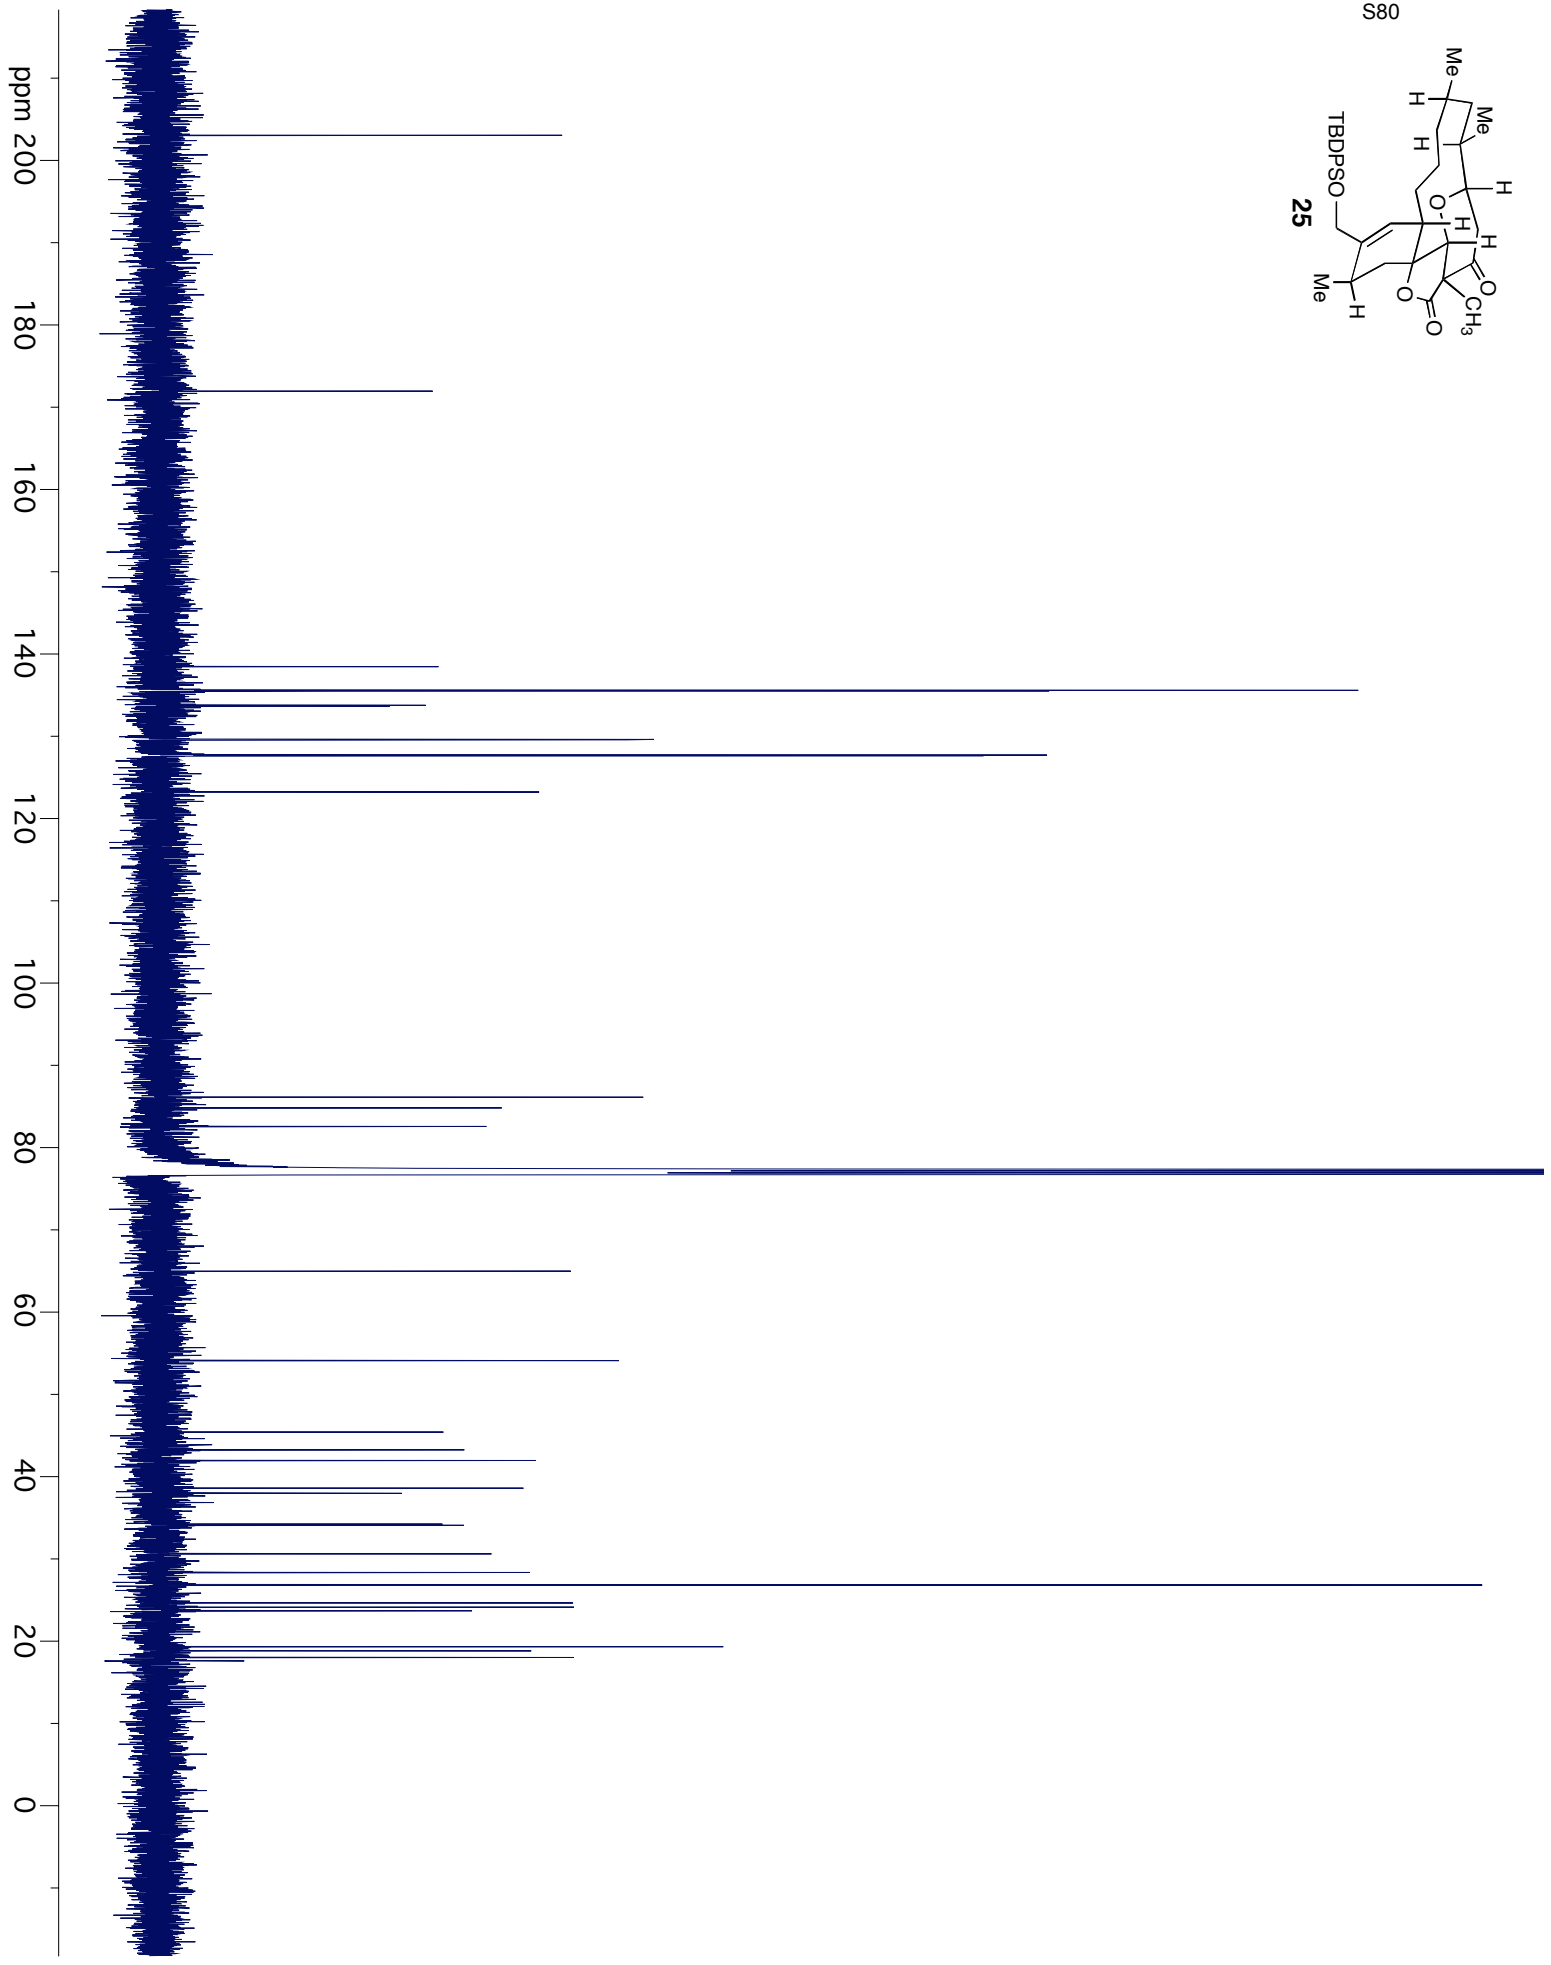

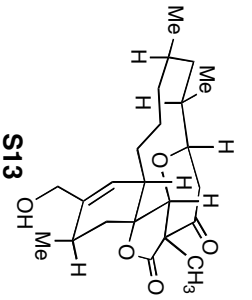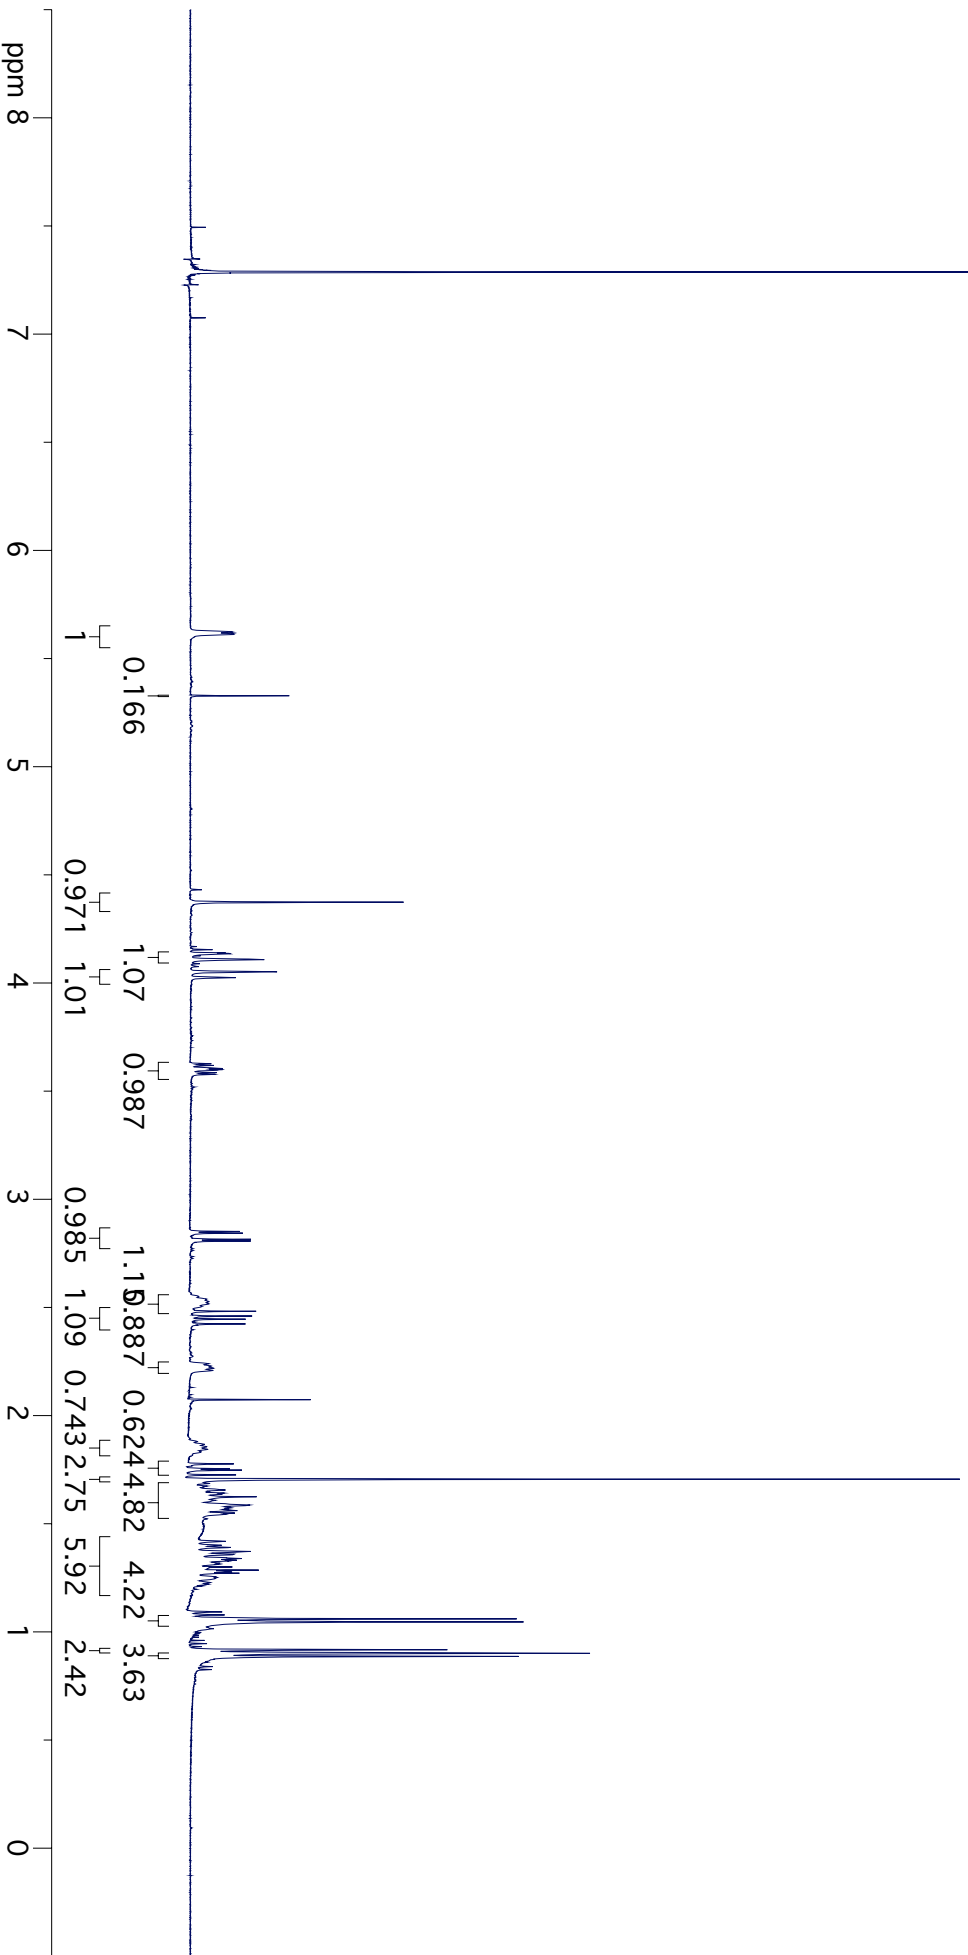

S82

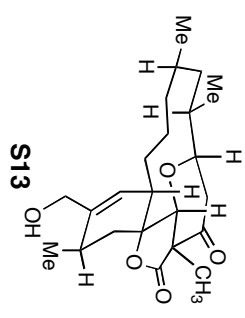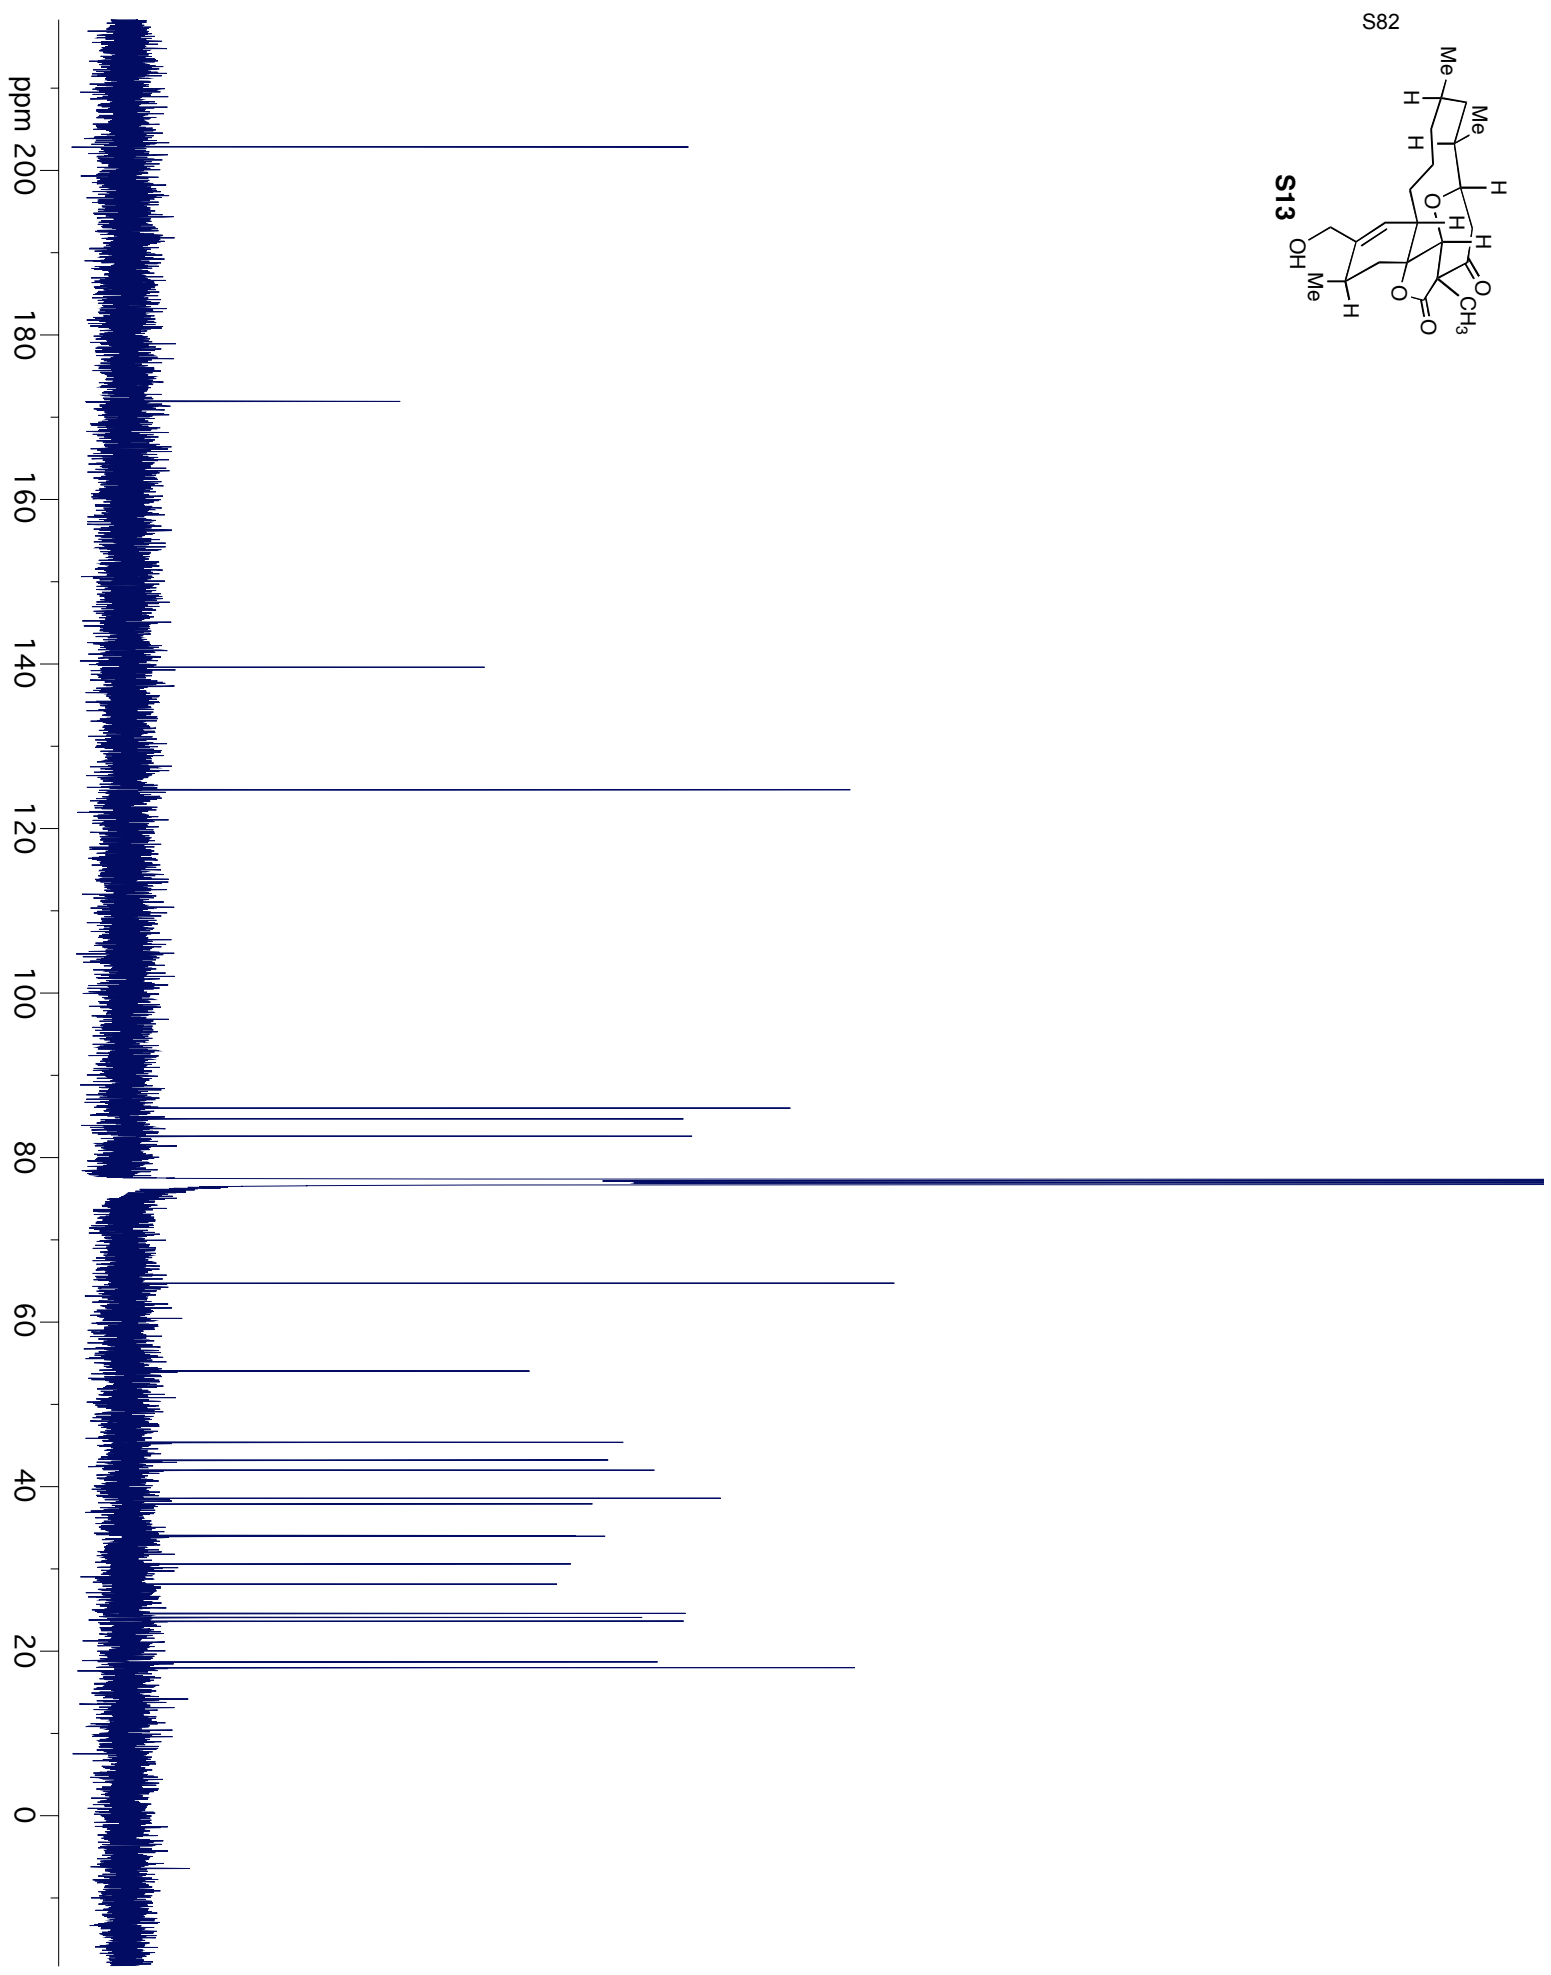

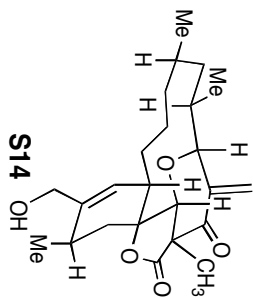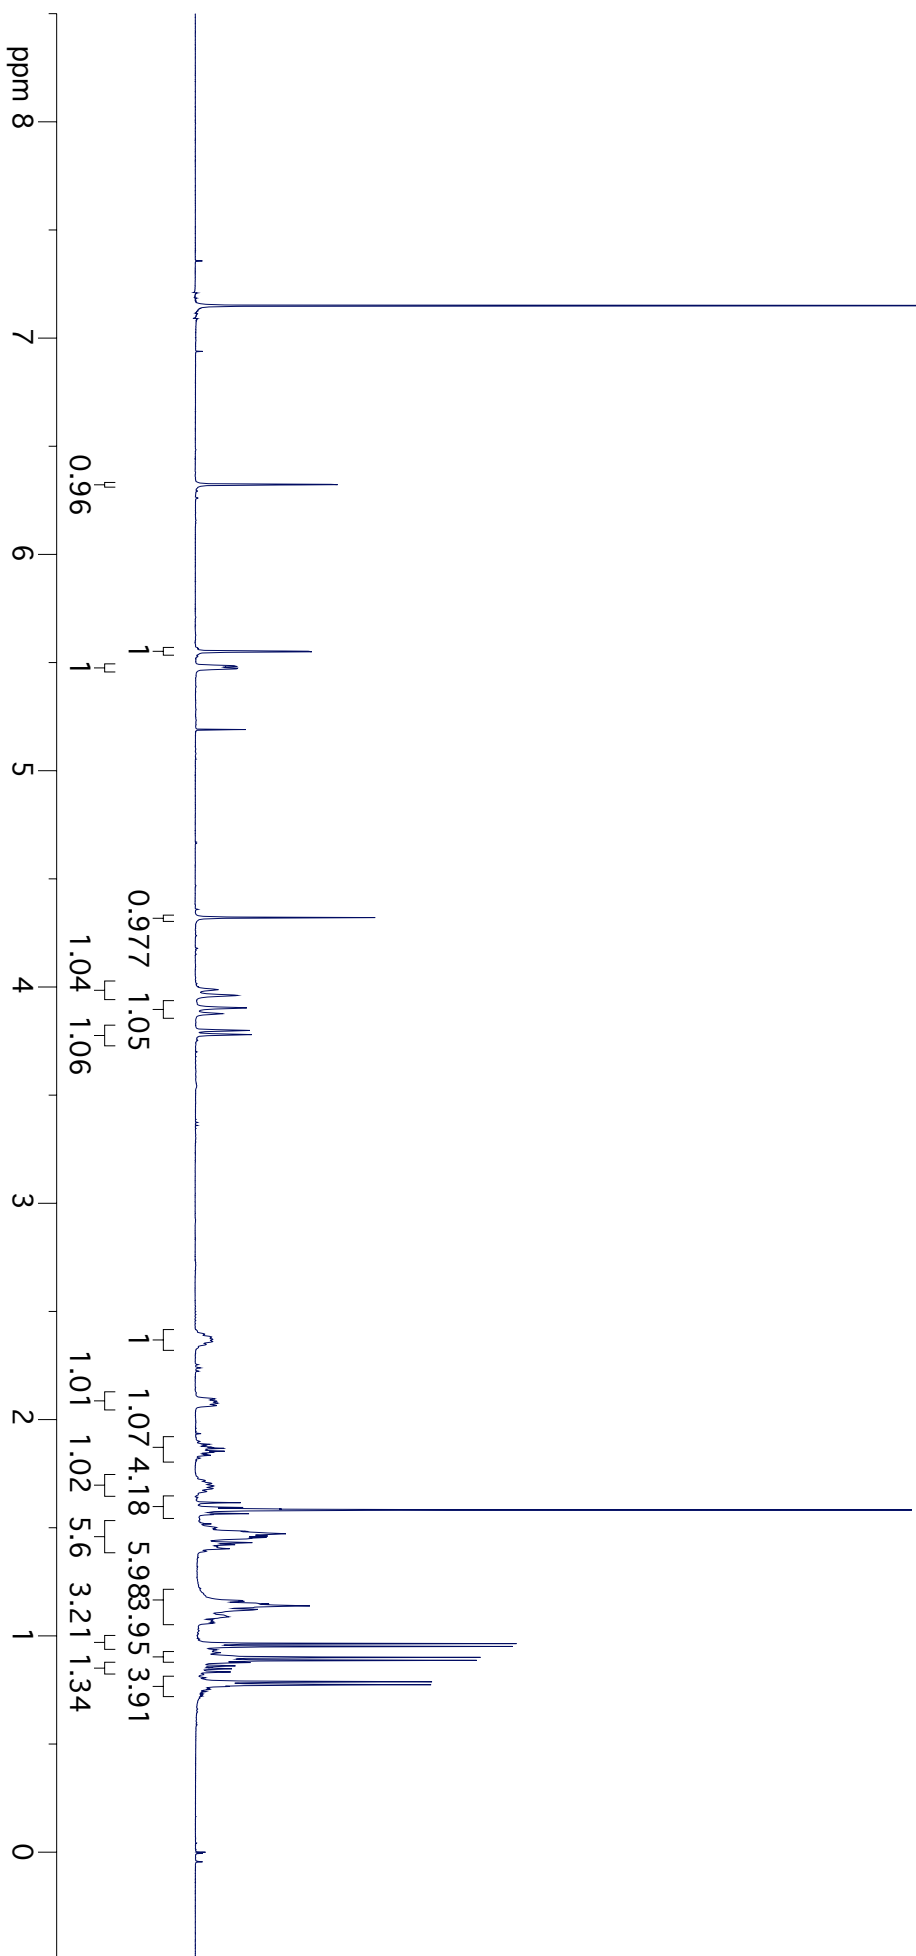

S84

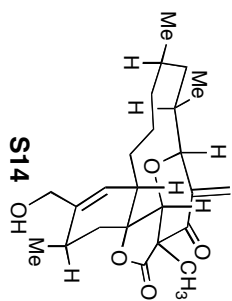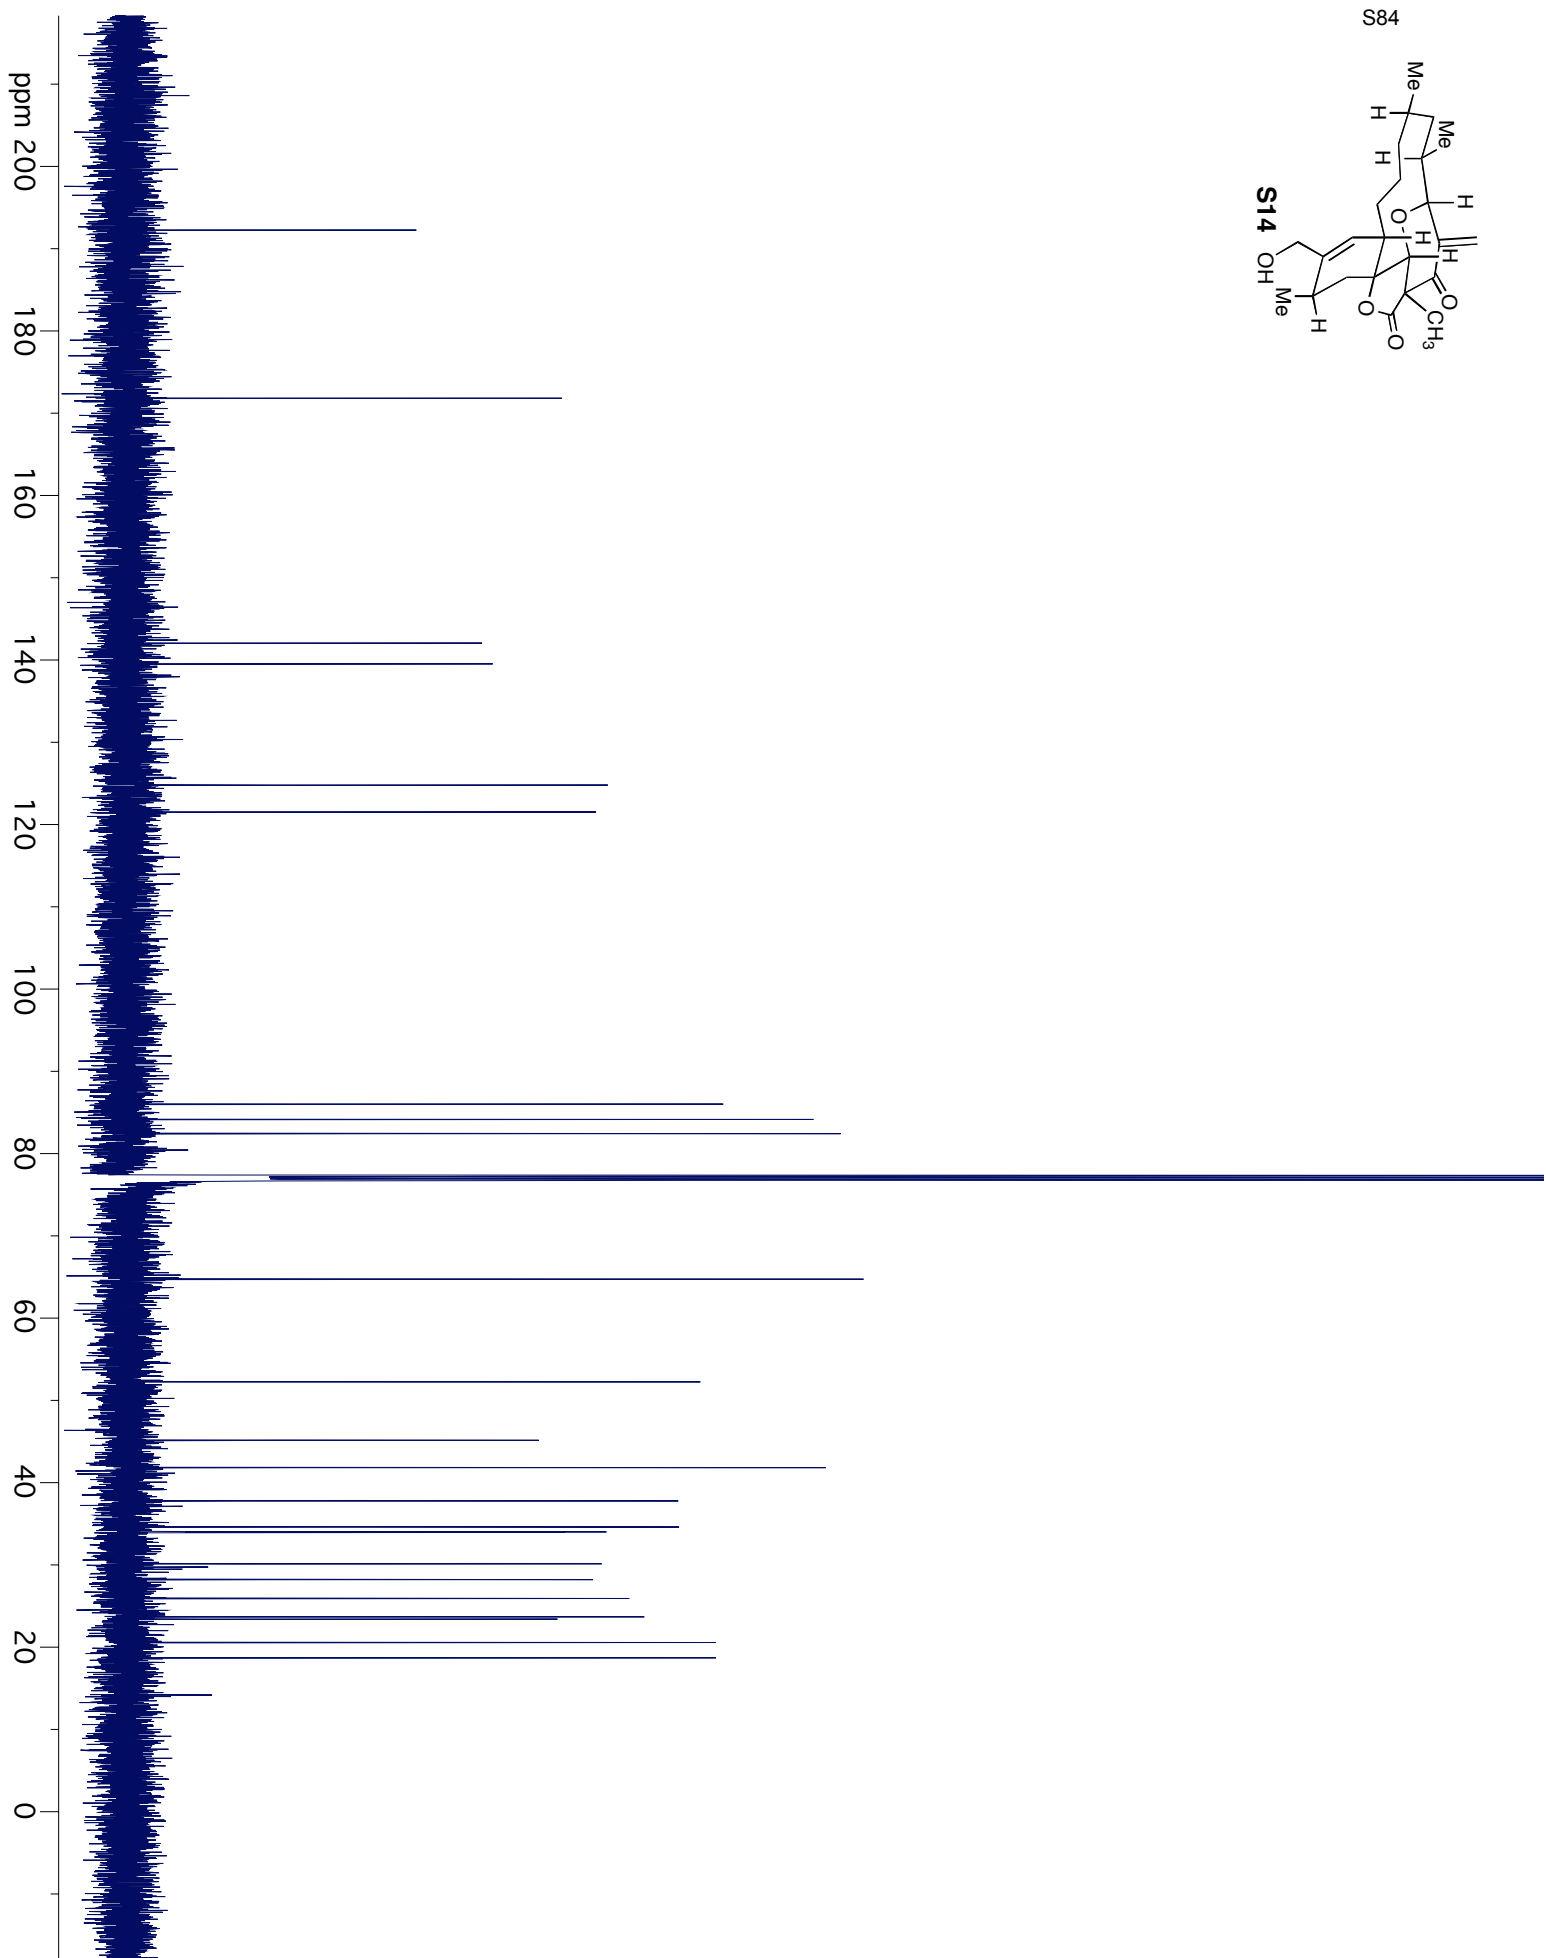

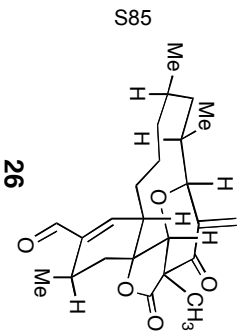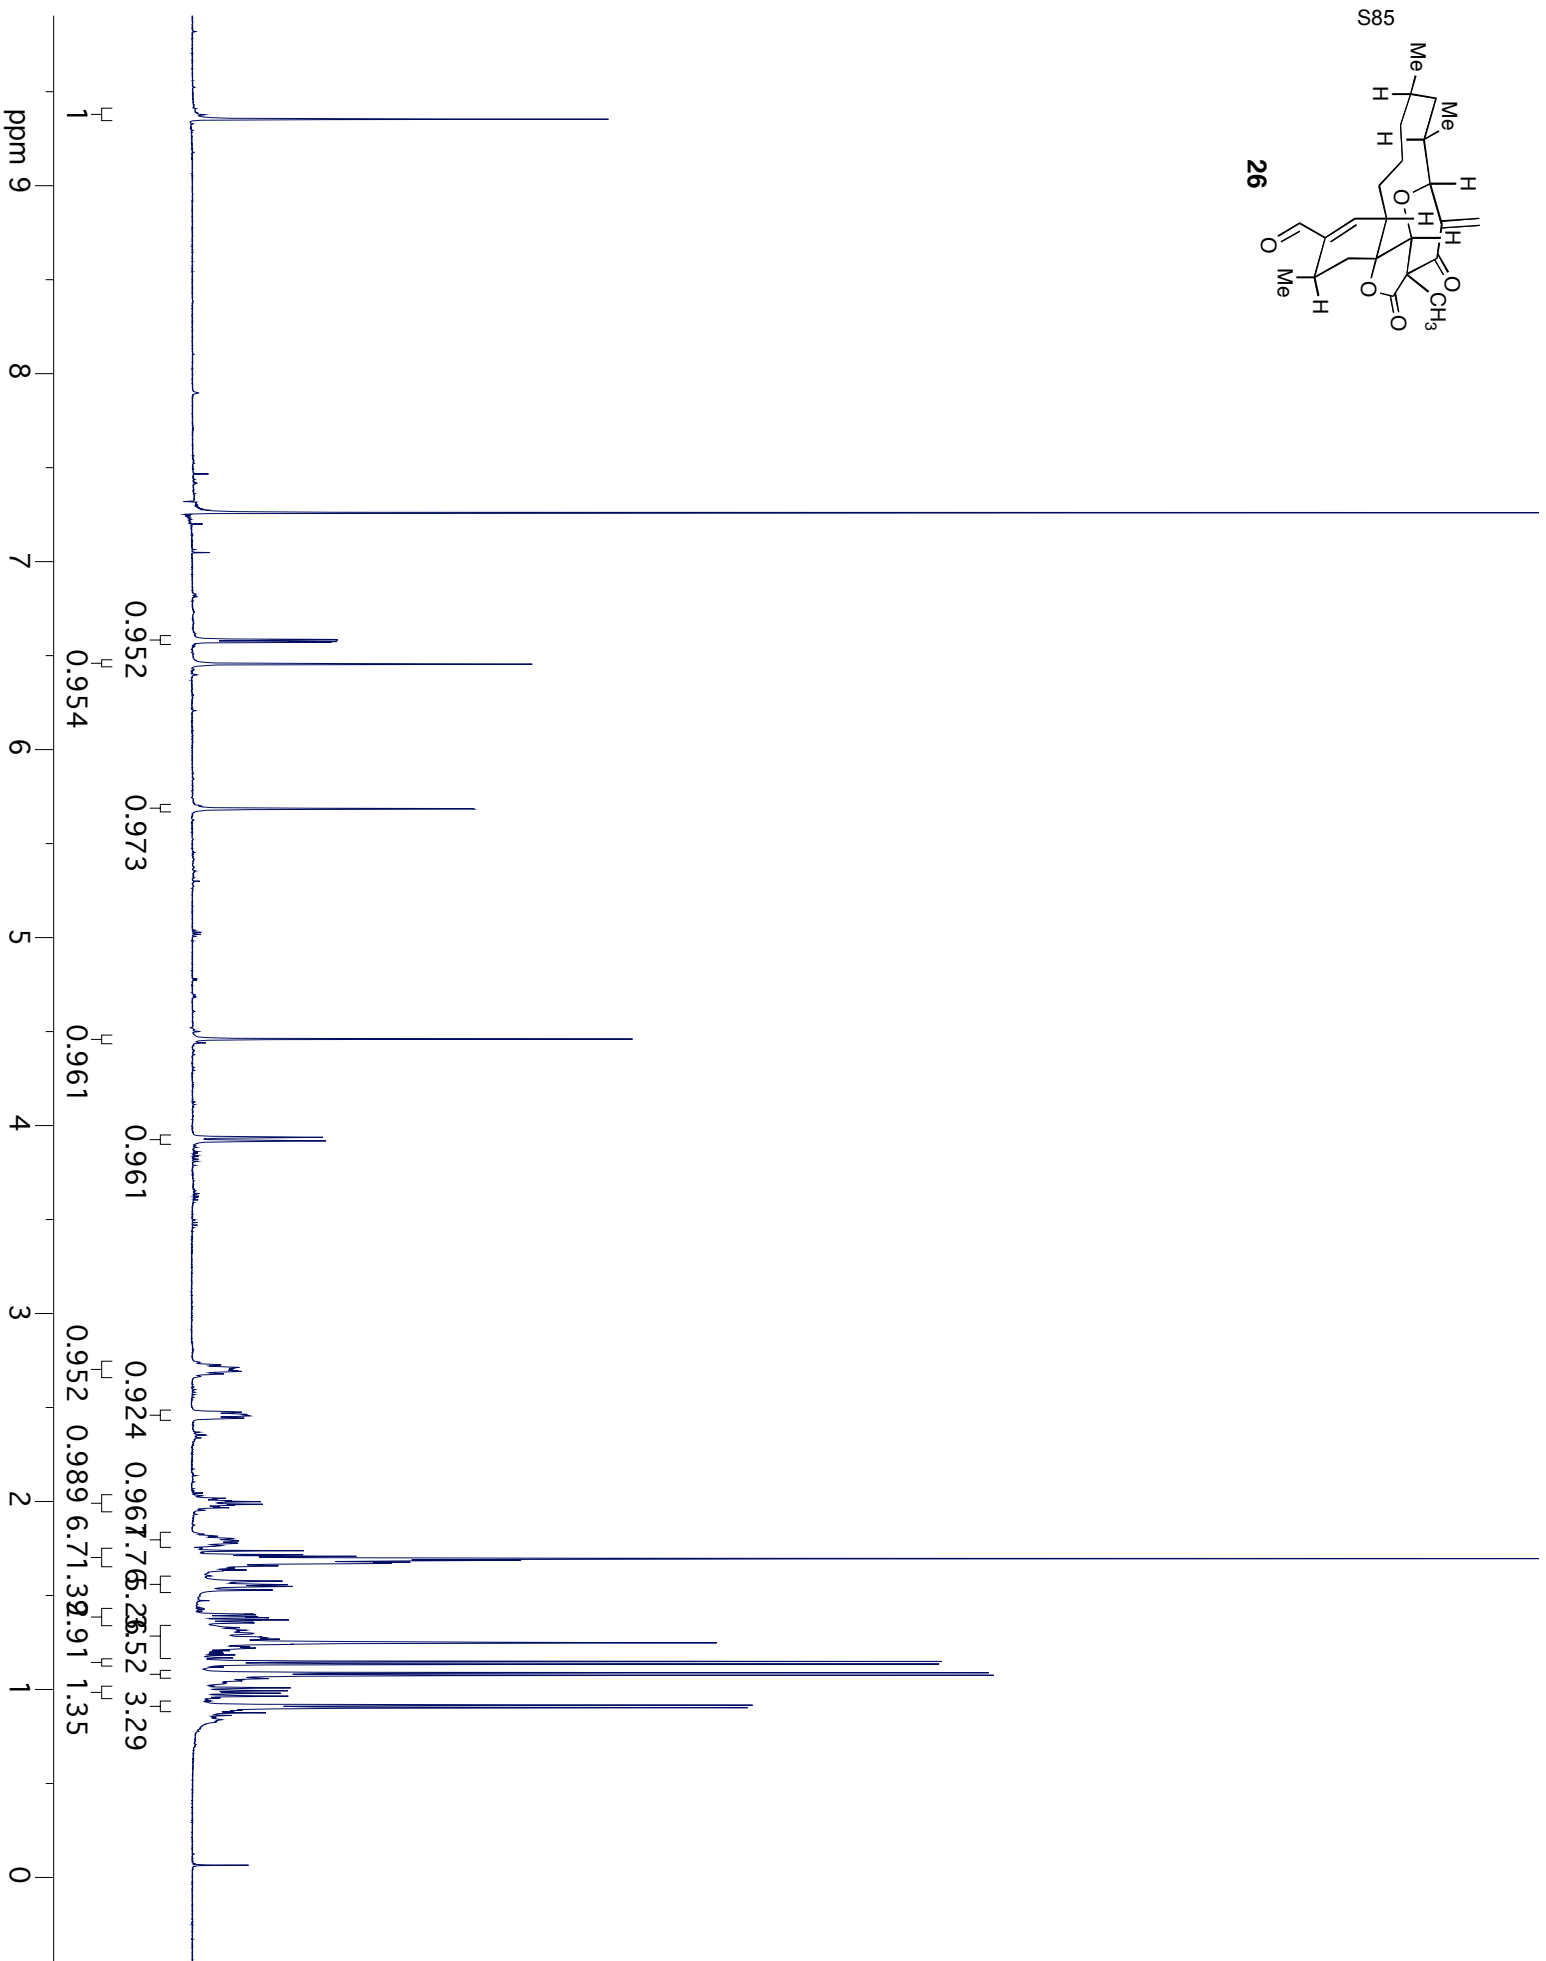

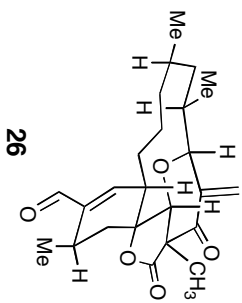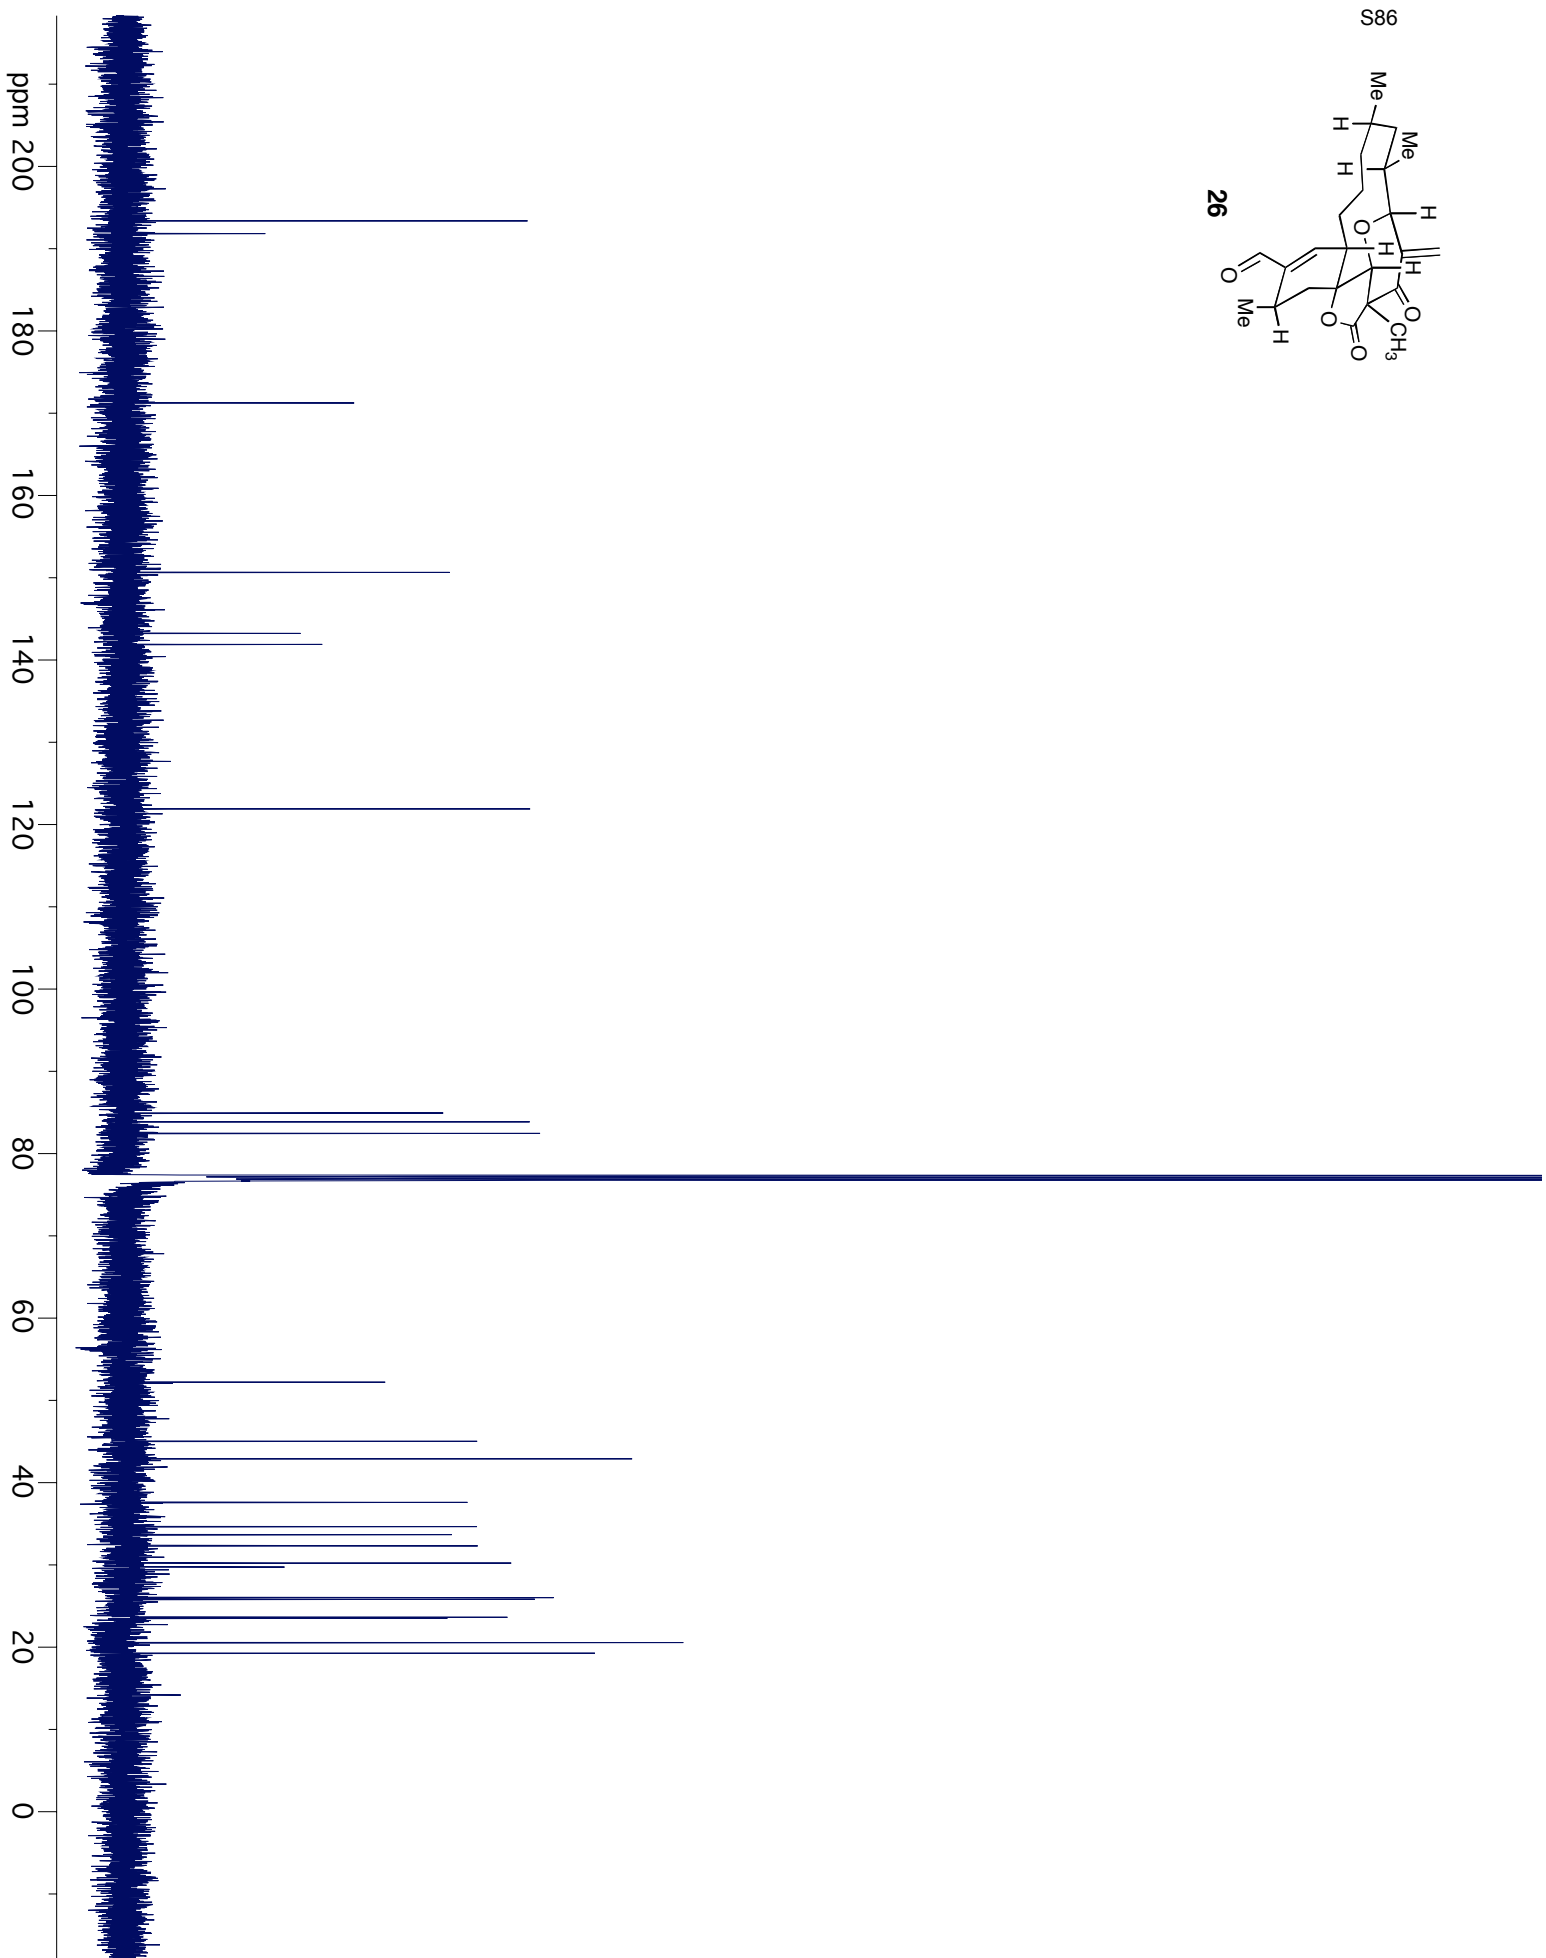





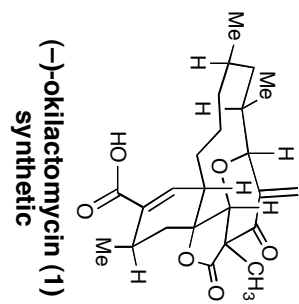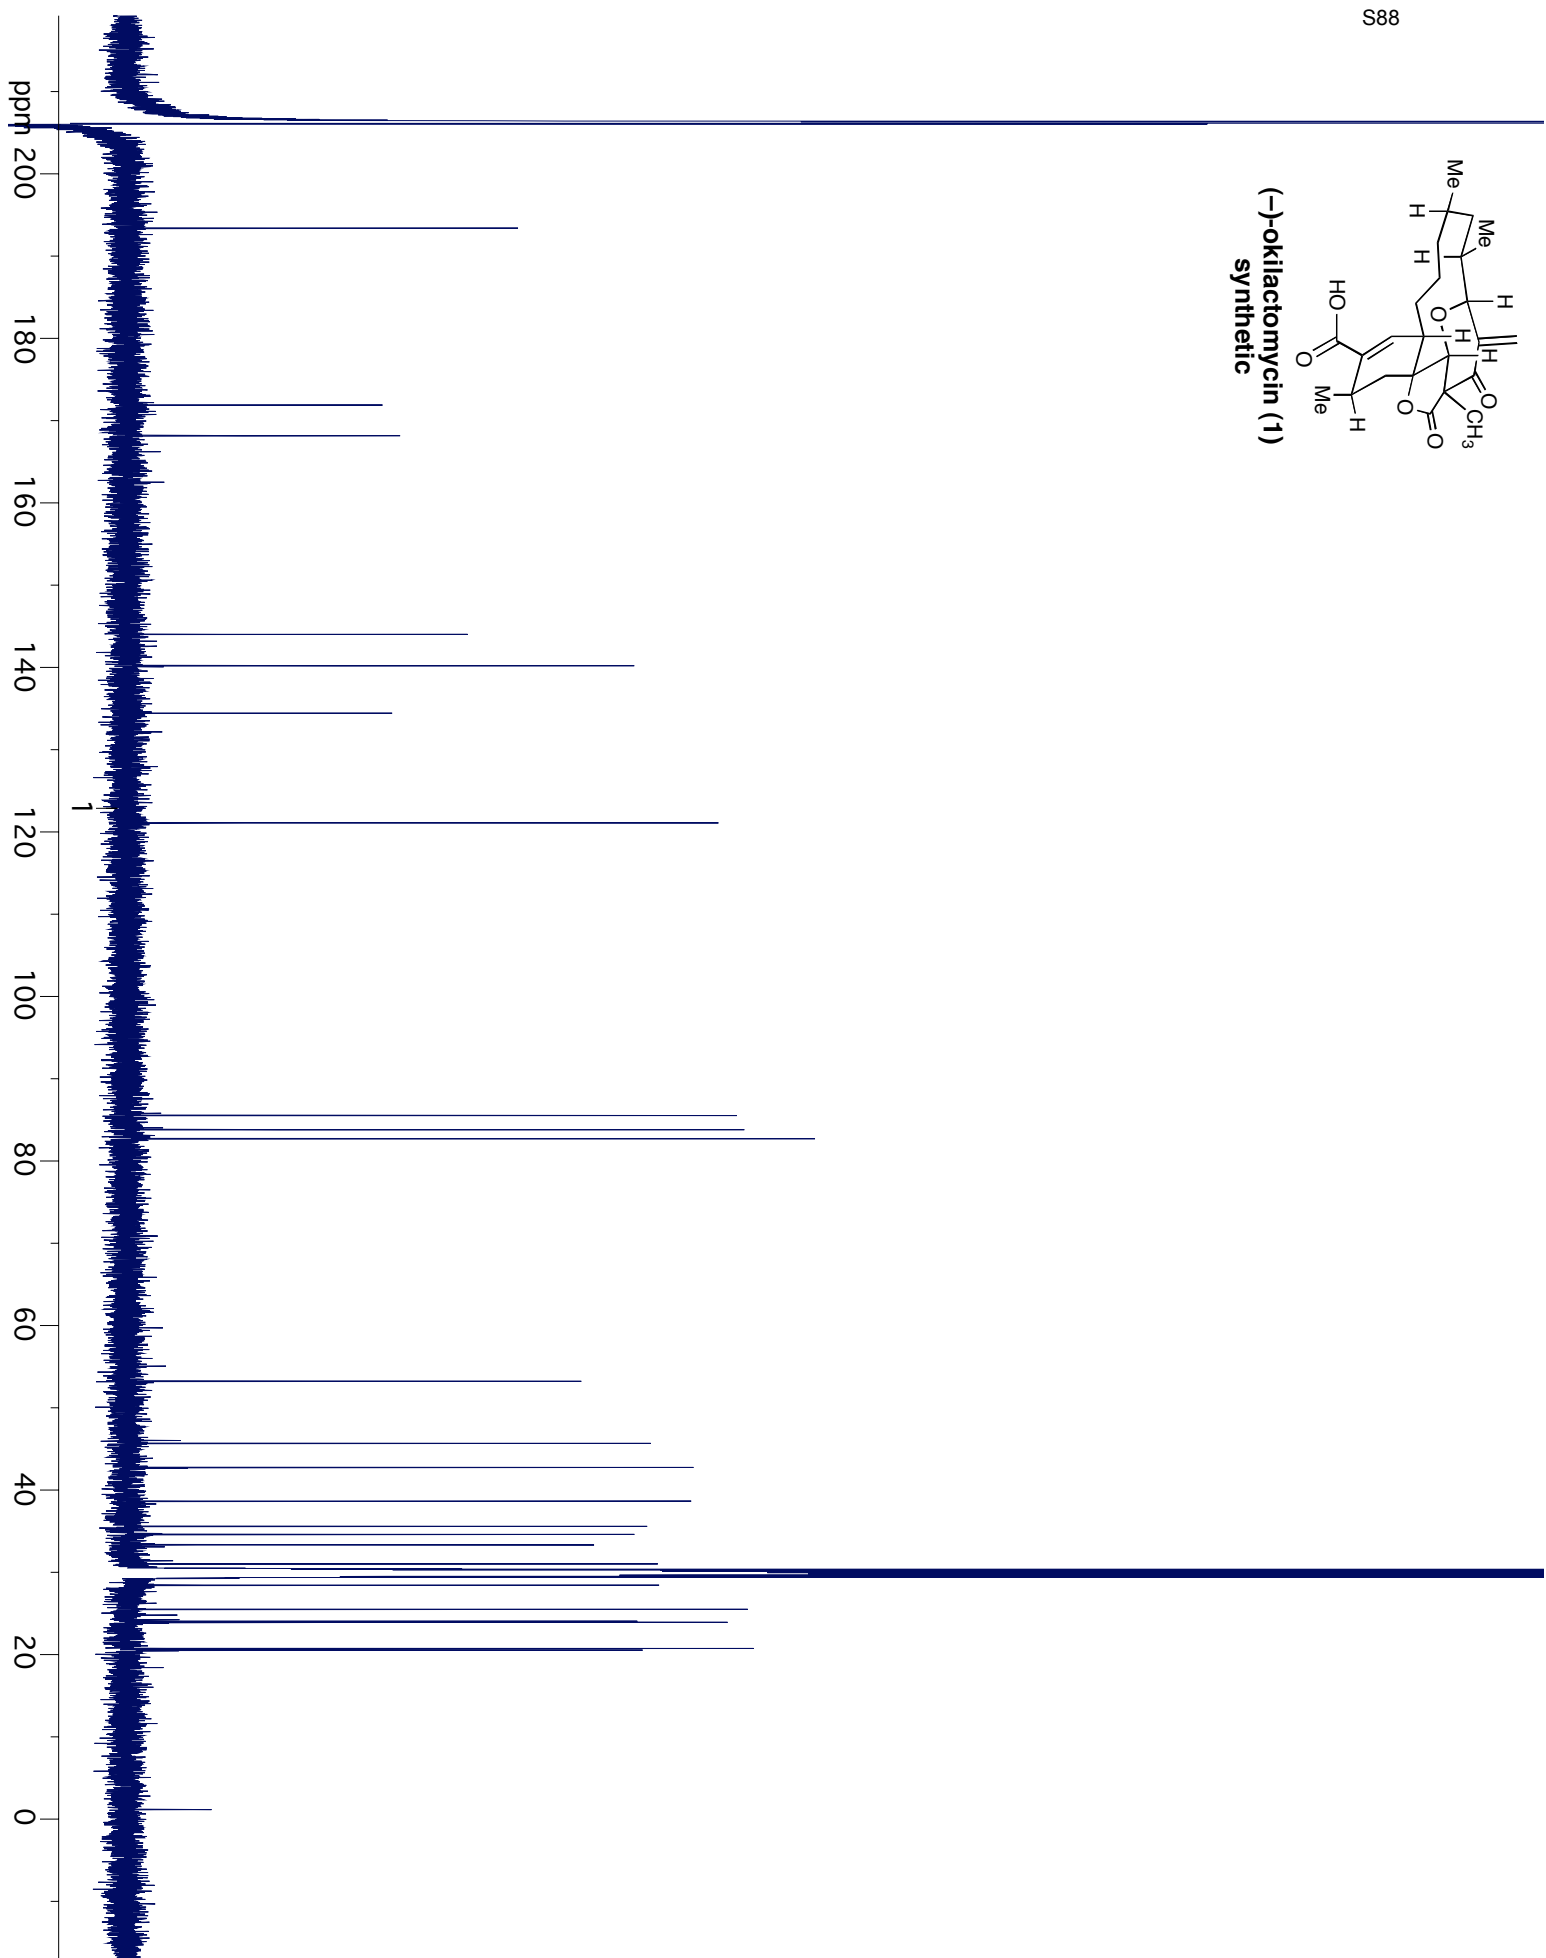



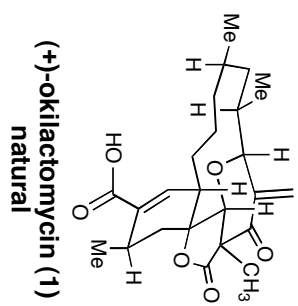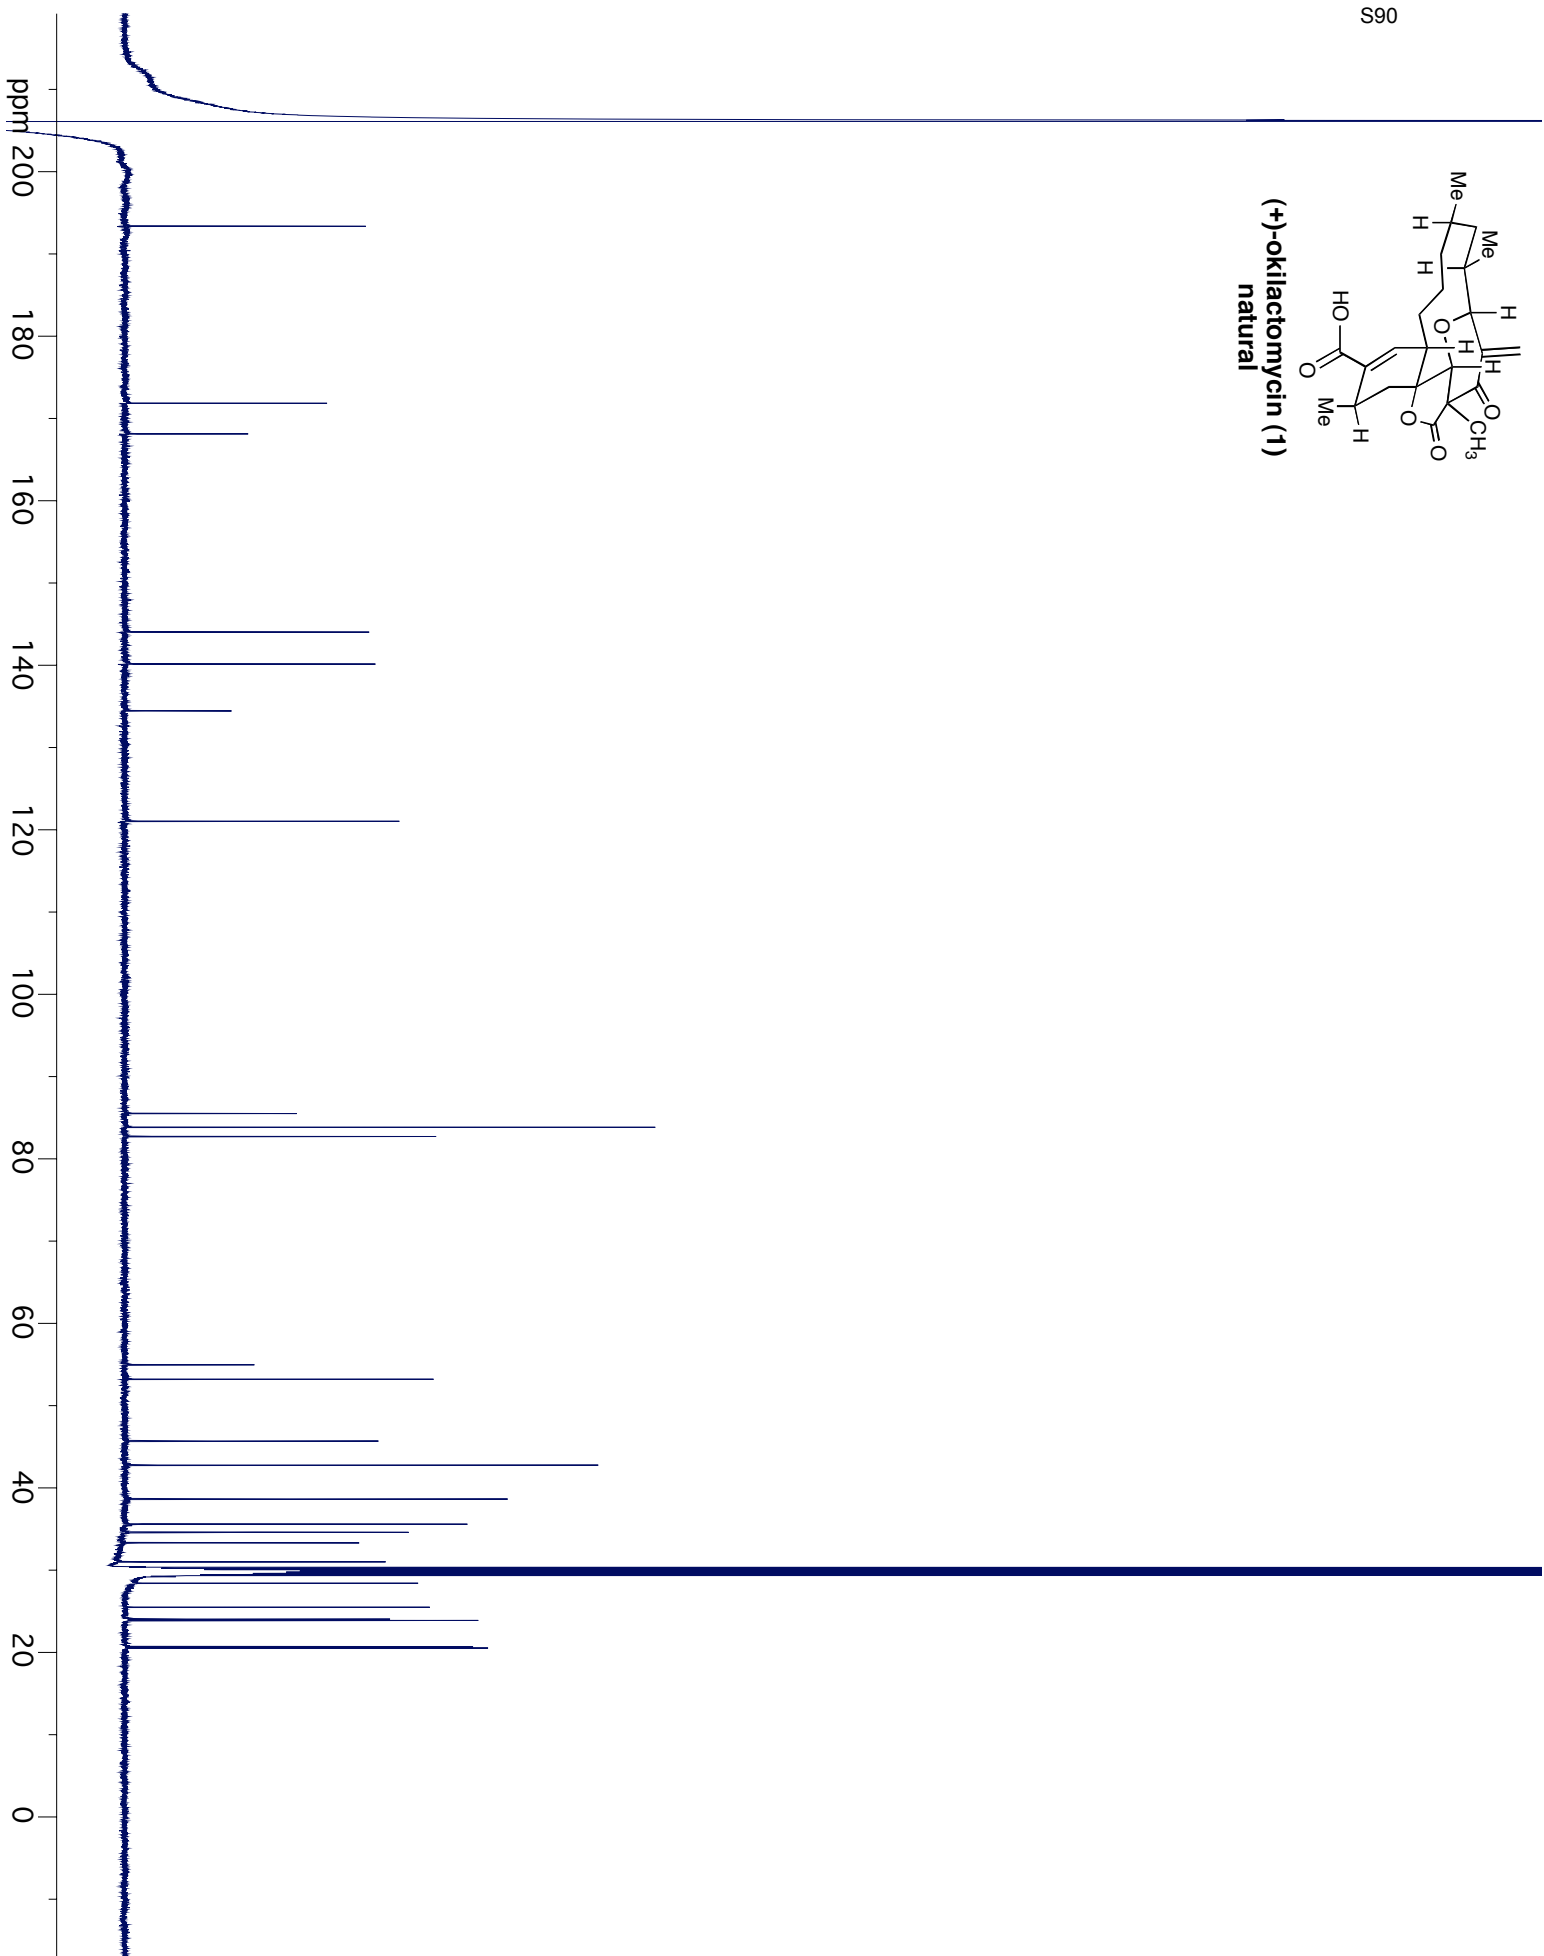

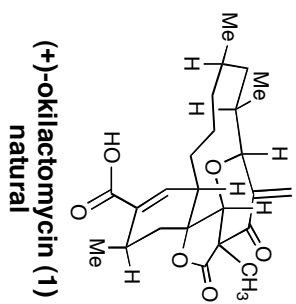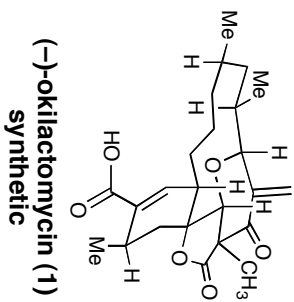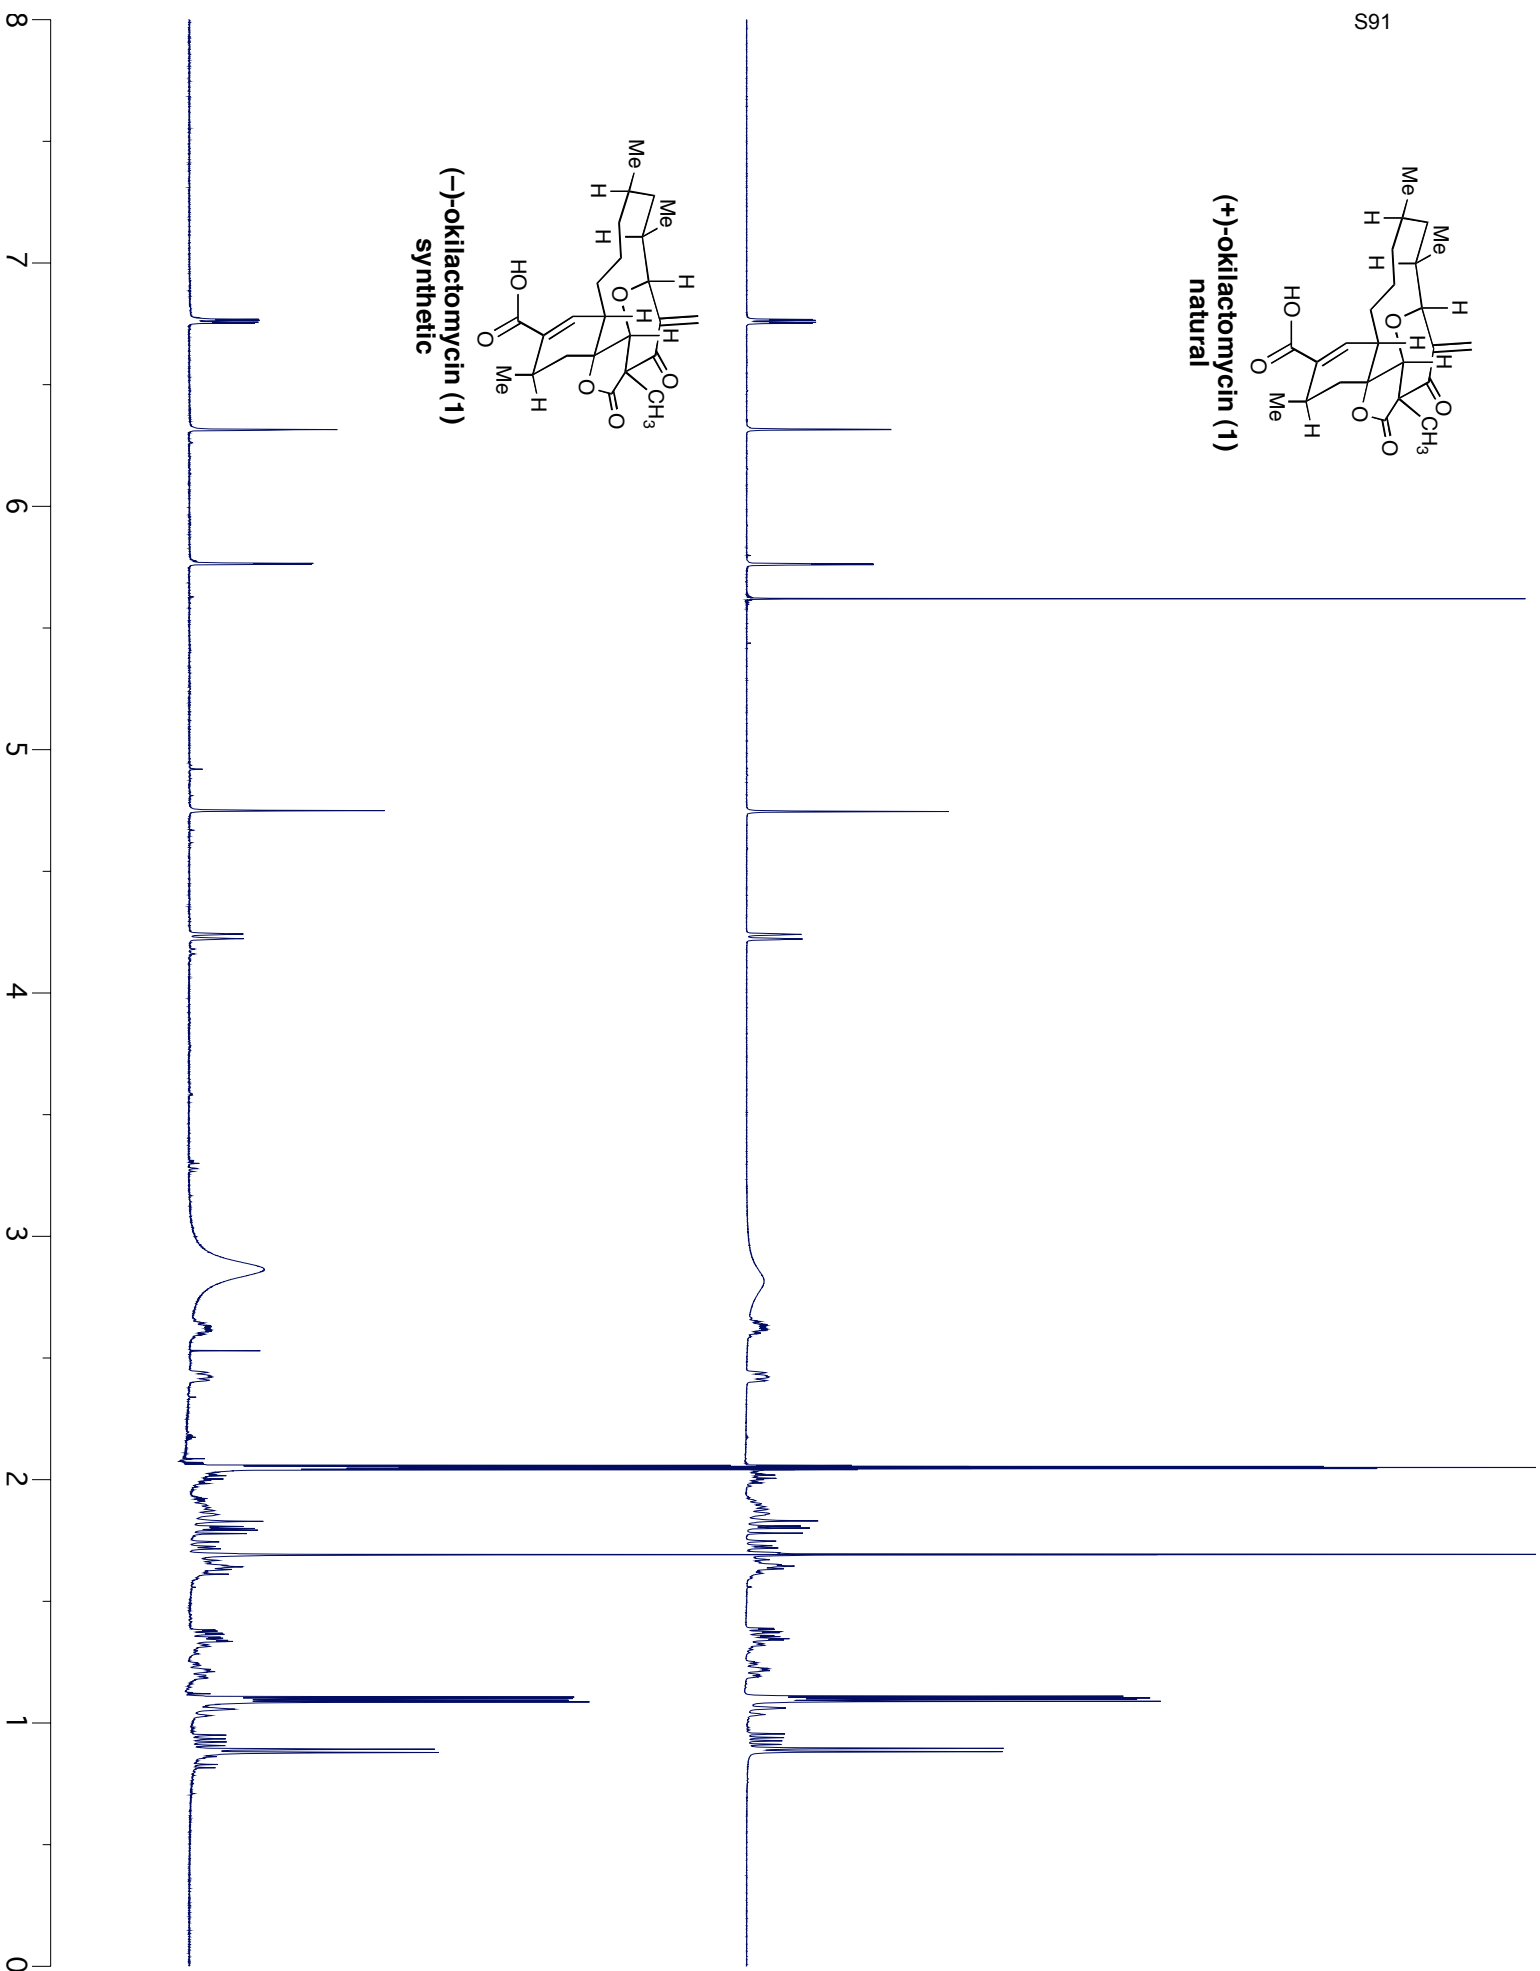

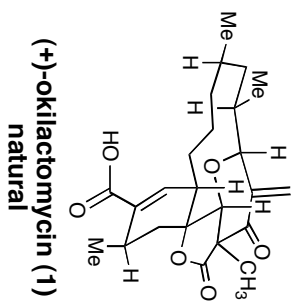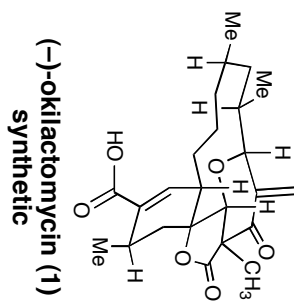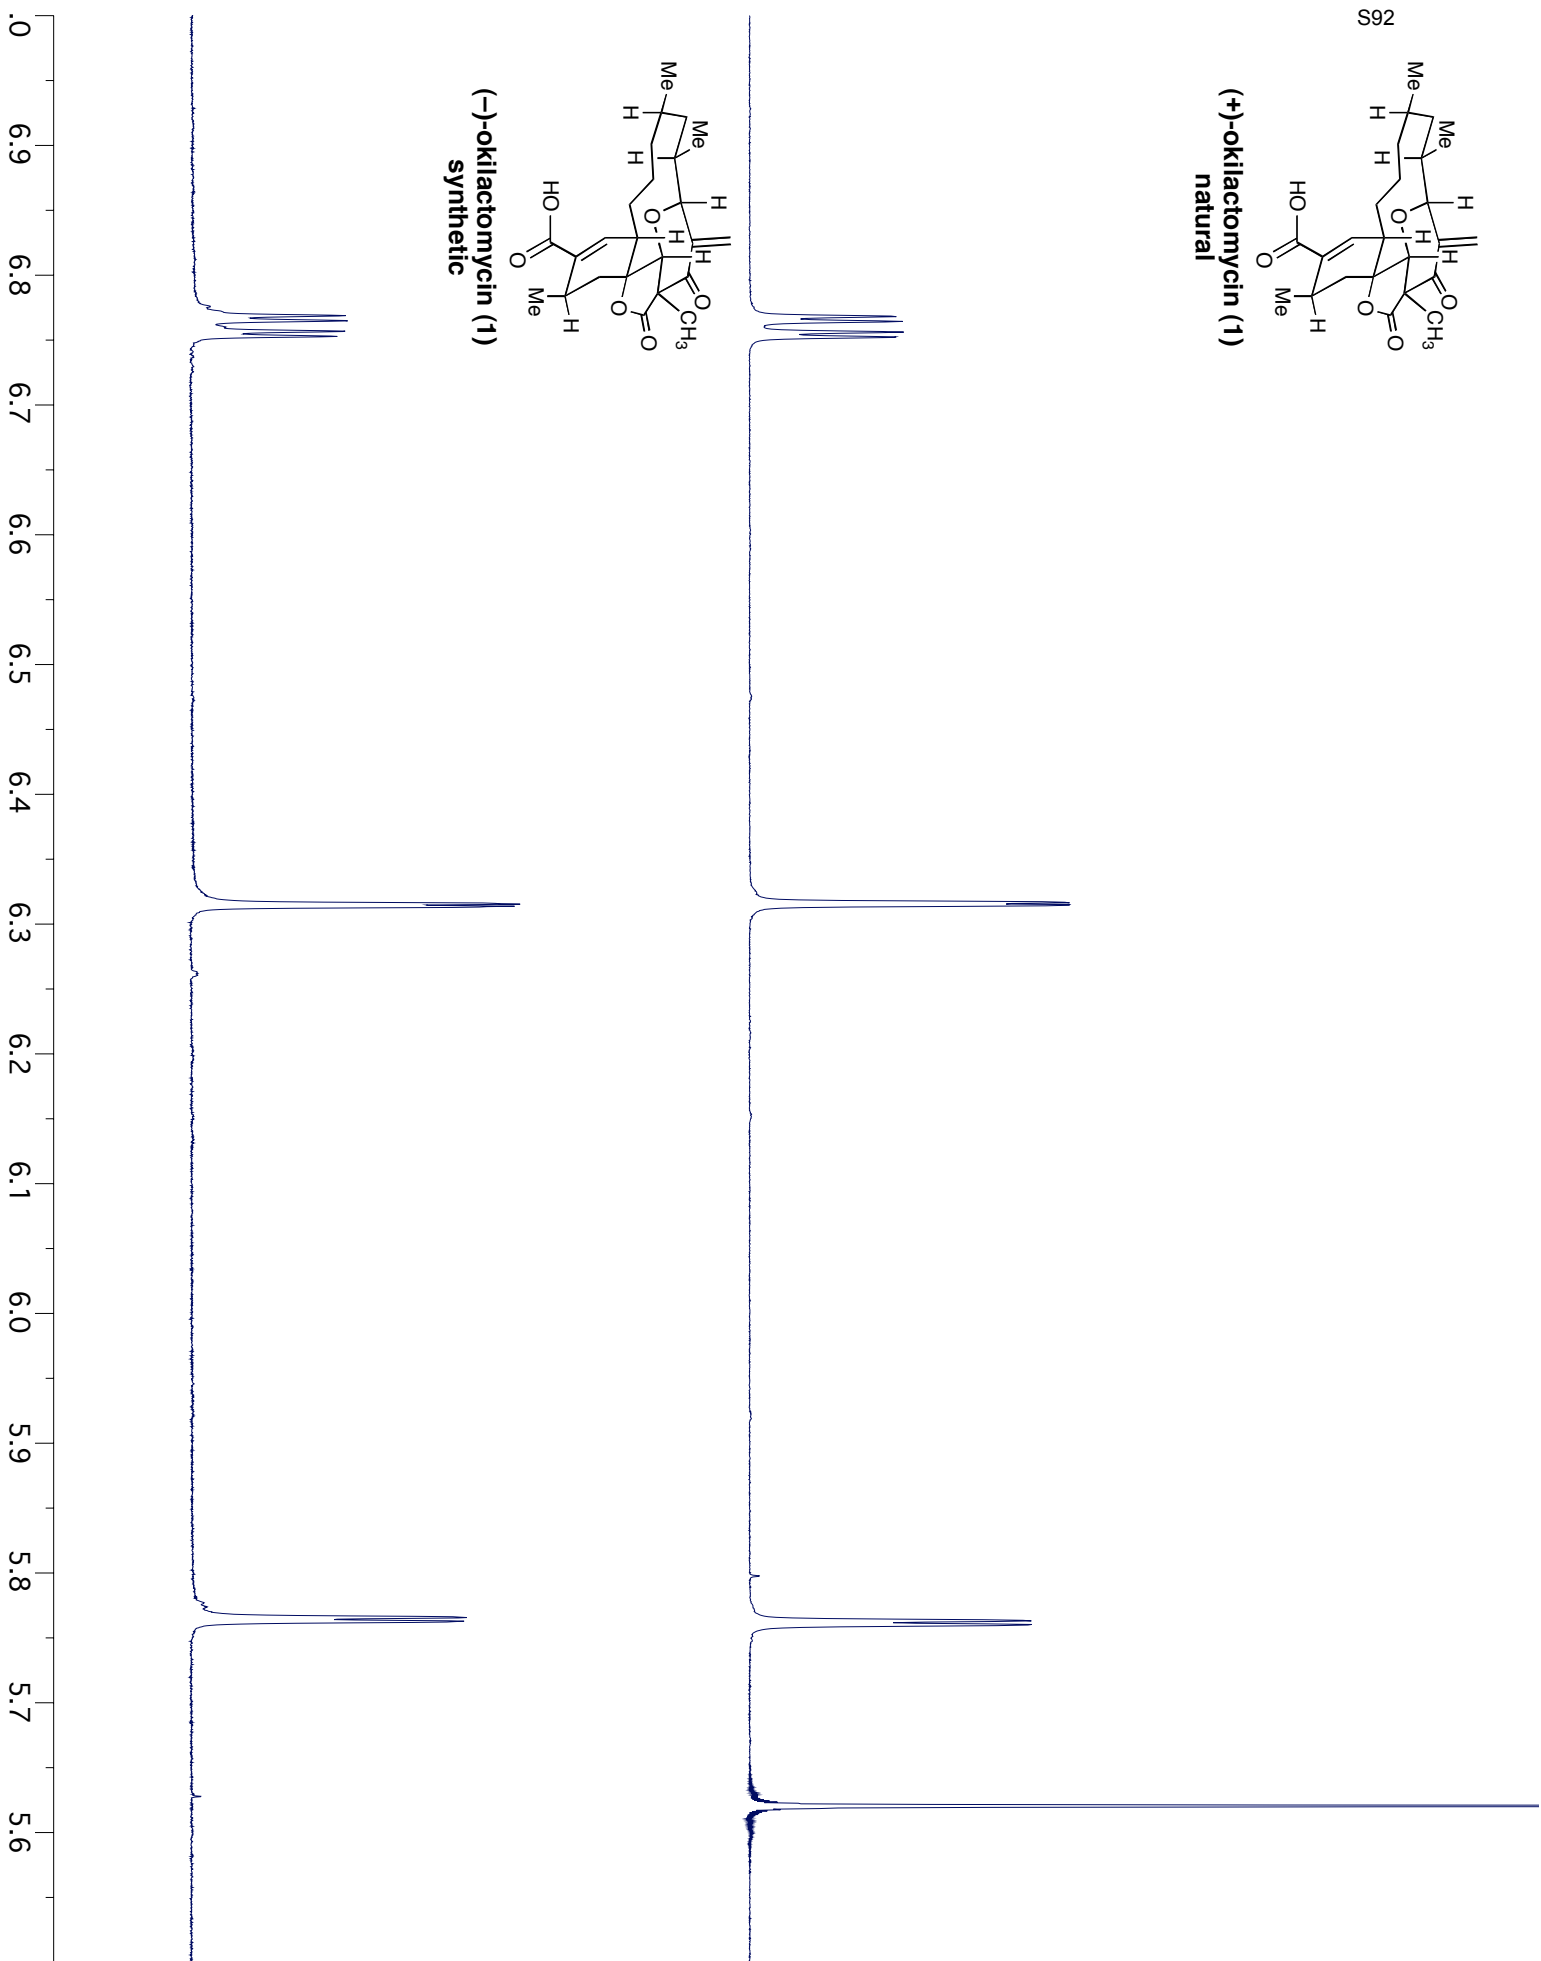

S93

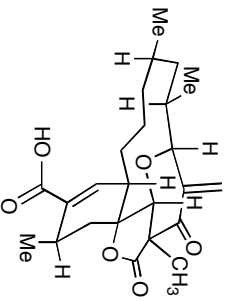

**(+)-okilactomycin (1)**  
natural

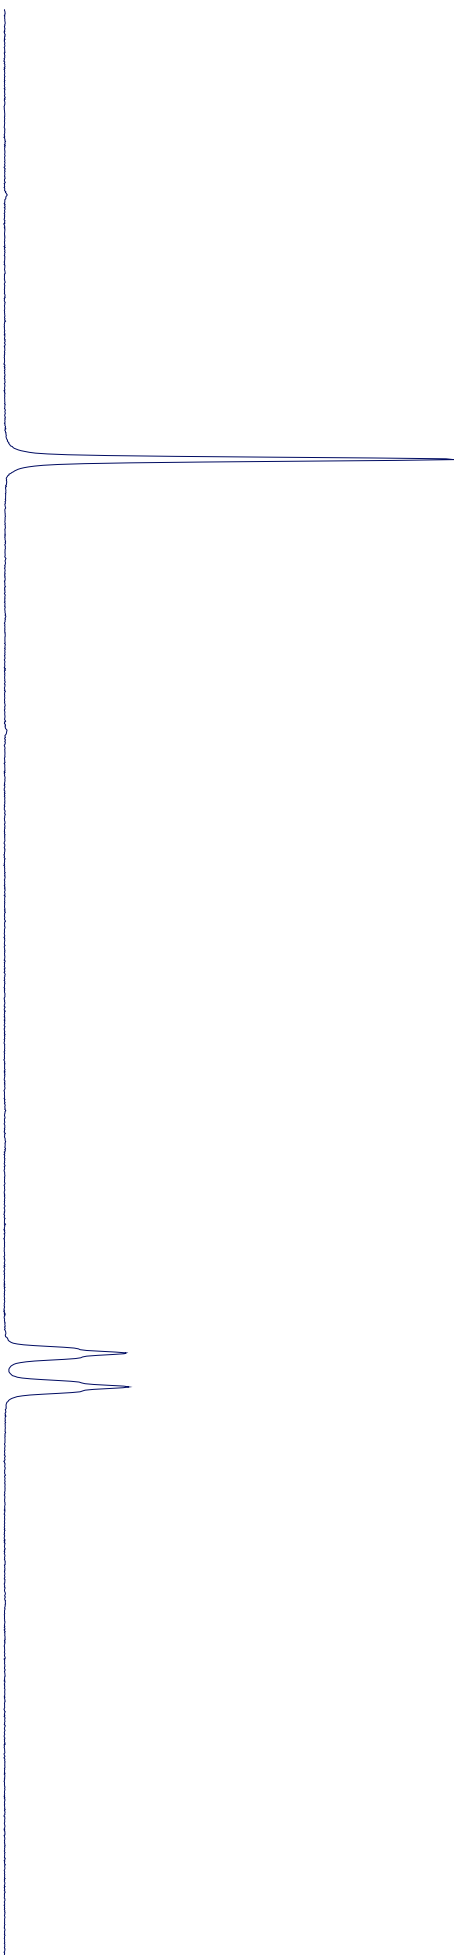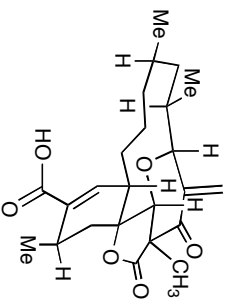

**(-)-okilactomycin (1)**  
synthetic

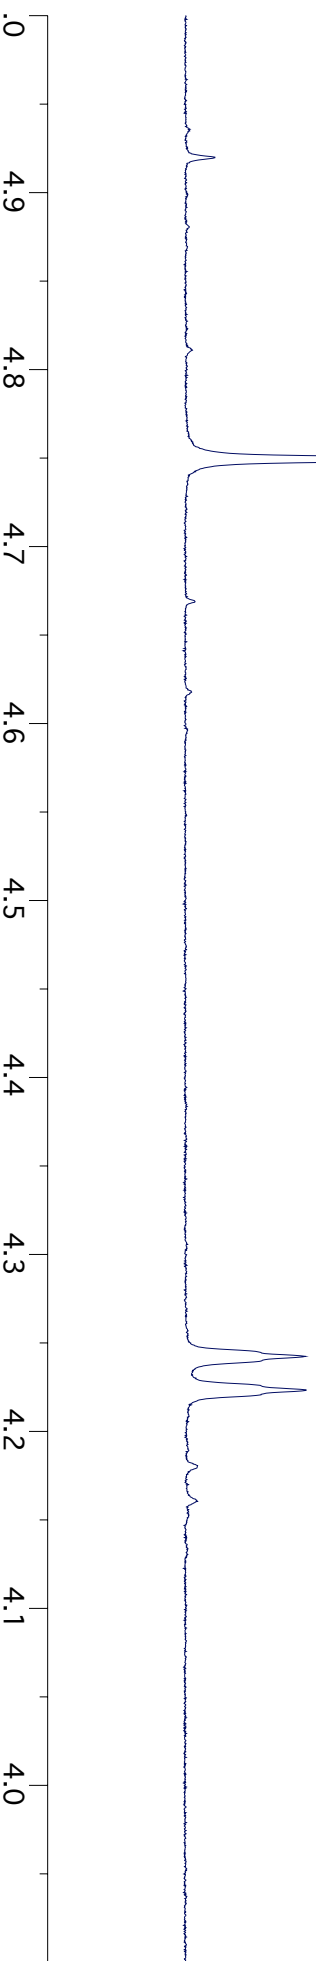

S94

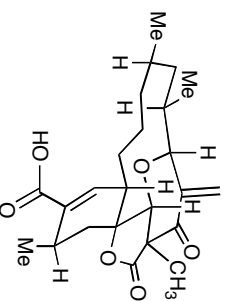

**(+)-okilactomycin (1)**  
natural

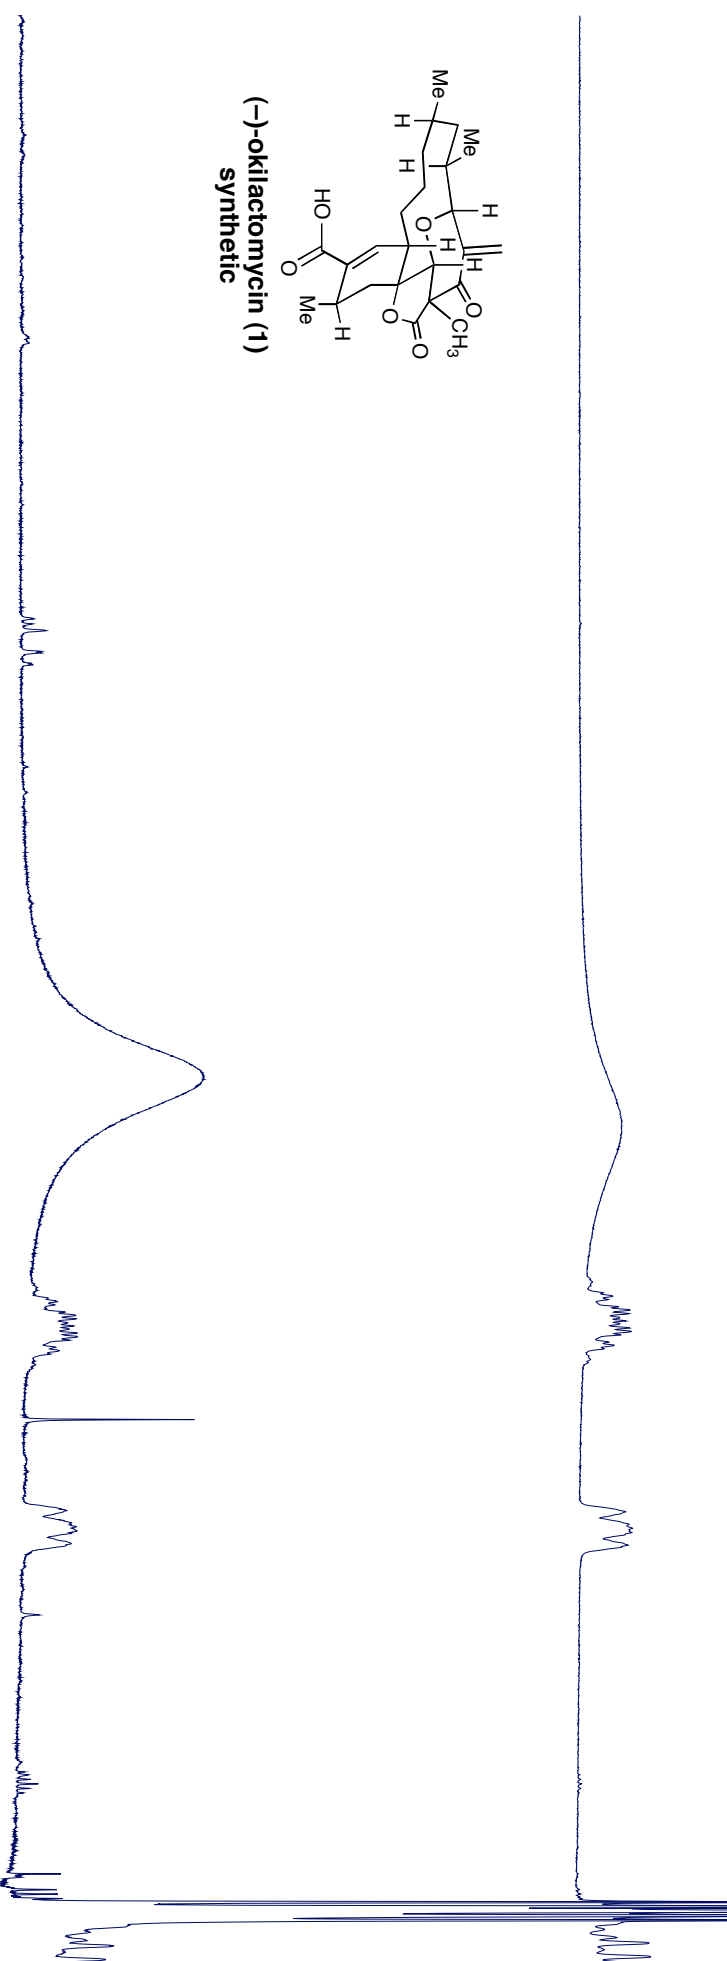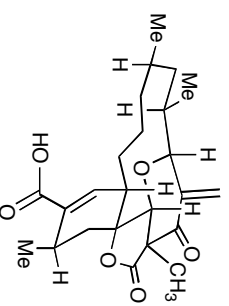

**(-)-okilactomycin (1)**  
synthetic

3.9  
3.8  
3.7  
3.6  
3.5  
3.4  
3.3  
3.2  
3.1  
3.0  
2.9  
2.8  
2.7  
2.6  
2.5  
2.4  
2.3  
2.2  
2.1

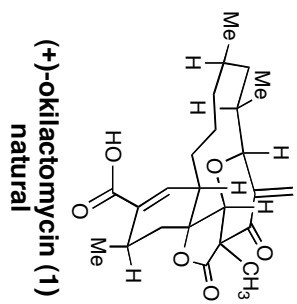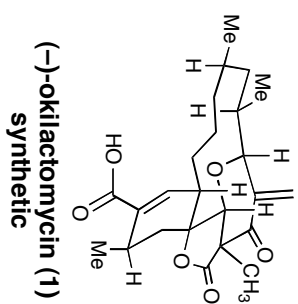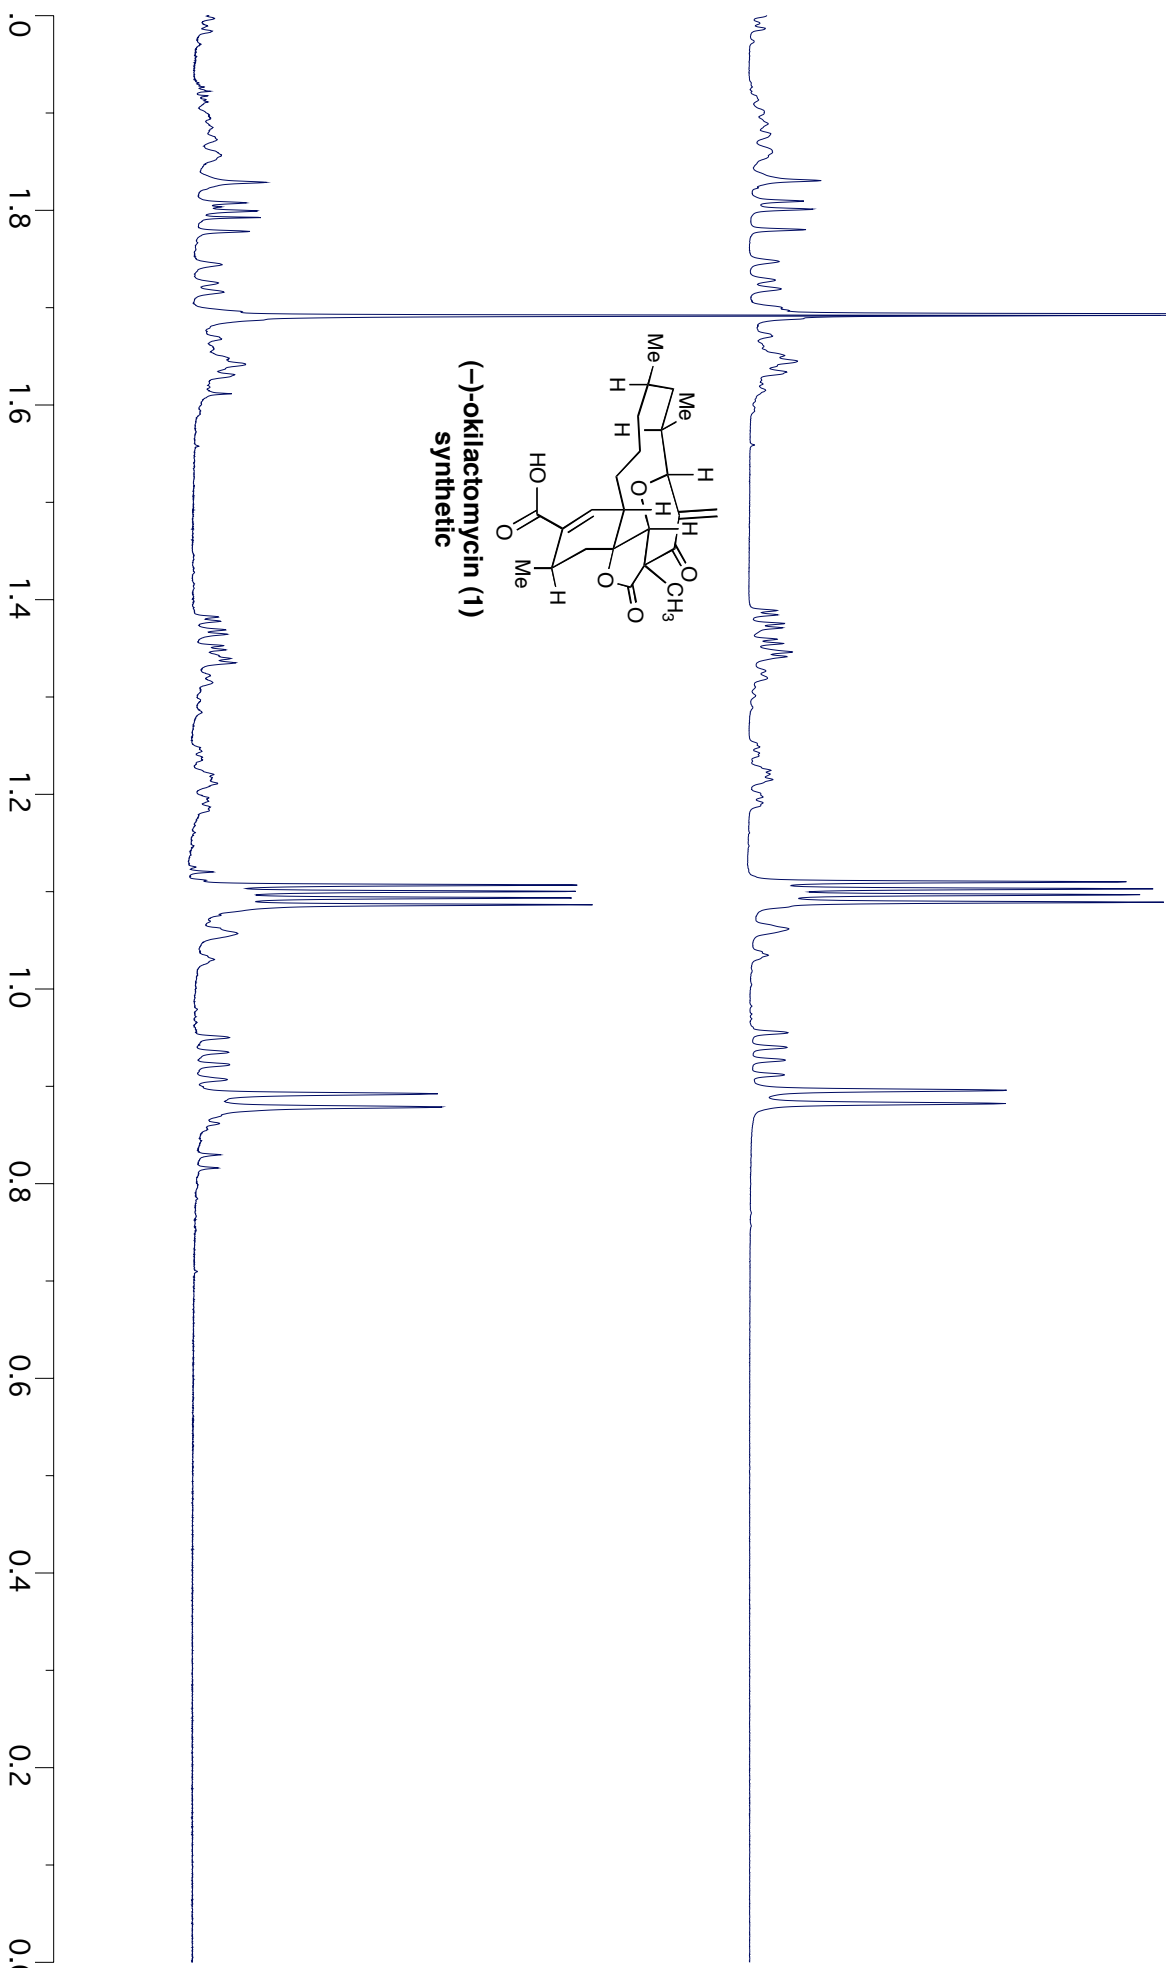



# checkCIF/PLATON report

No syntax errors found. CIF dictionary Interpreting this report

## Datablock: c\_\_users\_scheidt\_desktop\_work\_n0565\_0m

---

Bond precision: C-C = 0.0071 A Wavelength=1.54178

Cell: a=9.2888(8) b=15.3271(12) c=14.2532(11)  
 alpha=90 beta=100.633(6) gamma=90

Temperature: 100 K

|                | Calculated      | Reported        |
|----------------|-----------------|-----------------|
| Volume         | 1994.4(3)       | 1994.4(3)       |
| Space group    | P 21            | P2(1)           |
| Hall group     | P 2yb           | P 2yb           |
| Moiety formula | C45 H53 N O5 Si | C45 H53 N O5 Si |
| Sum formula    | C45 H53 N O5 Si | C45 H53 N O5 Si |
| Mr             | 715.97          | 715.97          |
| Dx,g cm-3      | 1.192           | 1.192           |
| Z              | 2               | 2               |
| Mu (mm-1)      | 0.877           | 0.877           |
| F000           | 768.0           | 768.0           |
| F000'          | 770.59          |                 |
| h,k,lmax       | 11,18,17        | 11,18,16        |
| Nref           | 3719[ 7146]     | 6565            |
| Tmin,Tmax      | 0.915,0.955     | 0.580,0.956     |
| Tmin'          | 0.543           |                 |

Correction method= MULTI-SCAN

Data completeness= 1.77/0.92 Theta(max)= 67.240

R(reflections)= 0.0637( 5034) wR2(reflections)= 0.1866( 6565)

S = 0.973

Npar= 473

---

The following ALERTS were generated. Each ALERT has the format

**test-name\_ALERT\_alert-type\_alert-level.**

Click on the hyperlinks for more details of the test.

---

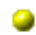

### Alert level C

PLAT029\_ALERT\_3\_C \_diffrn\_measured\_fraction\_theta\_full Low ..... 0.97  
 PLAT340\_ALERT\_3\_C Low Bond Precision on C-C Bonds (x 1000) Ang .. 7

---

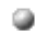

### Alert level G

REFLT03\_ALERT\_4\_G Please check that the estimate of the number of Friedel pairs is

```

correct. If it is not, please give the correct count in the
  _publ_section_exptl_refinement section of the submitted CIF.
From the CIF: _diffrn_reflms_theta_max          67.24
From the CIF: _reflms_number_total             6565
Count of symmetry unique reflns                3719
Completeness (_total/calc)                     176.53%
TEST3: Check Friedels for noncentro structure
Estimate of Friedel pairs measured             2846
Fraction of Friedel pairs measured             0.765
Are heavy atom types Z>Si present              yes
PLAT063_ALERT_4_G Crystal Size Likely too Large for Beam Size .... 0.70 mm
PLAT072_ALERT_2_G SHELXL First Parameter in WGHT Unusually Large. 0.13
PLAT791_ALERT_4_G Note: The Model has Chirality at C20 (Verify) S
PLAT791_ALERT_4_G Note: The Model has Chirality at C21 (Verify) R
PLAT791_ALERT_4_G Note: The Model has Chirality at C23 (Verify) S
PLAT791_ALERT_4_G Note: The Model has Chirality at C28 (Verify) S

```

---

```

0 ALERT level A = Most likely a serious problem - resolve or explain
0 ALERT level B = A potentially serious problem, consider carefully
2 ALERT level C = Check. Ensure it is not caused by an omission or oversight
7 ALERT level G = General information/check it is not something unexpected

0 ALERT type 1 CIF construction/syntax error, inconsistent or missing data
1 ALERT type 2 Indicator that the structure model may be wrong or deficient
2 ALERT type 3 Indicator that the structure quality may be low
6 ALERT type 4 Improvement, methodology, query or suggestion
0 ALERT type 5 Informative message, check

```

---

**It is advisable to attempt to resolve as many as possible of the alerts in all categories. Often the minor alerts point to easily fixed oversights, errors and omissions in your CIF or refinement strategy, so attention to these fine details can be worthwhile. In order to resolve some of the more serious problems it may be necessary to carry out additional measurements or structure refinements. However, the purpose of your study may justify the reported deviations and the more serious of these should normally be commented upon in the discussion or experimental section of a paper or in the "special\_details" fields of the CIF. checkCIF was carefully designed to identify outliers and unusual parameters, but every test has its limitations and alerts that are not important in a particular case may appear. Conversely, the absence of alerts does not guarantee there are no aspects of the results needing attention. It is up to the individual to critically assess their own results and, if necessary, seek expert advice.**

### **Publication of your CIF in IUCr journals**

**A basic structural check has been run on your CIF. These basic checks will be run on all CIFs submitted for publication in IUCr journals (*Acta Crystallographica*, *Journal of Applied Crystallography*, *Journal of Synchrotron Radiation*); however, if you intend to submit to *Acta Crystallographica Section C* or *E*, you should make sure that full publication checks are run on the final version of your CIF prior to submission.**

### **Publication of your CIF in other journals**

**Please refer to the *Notes for Authors* of the relevant journal for any special instructions relating to CIF submission.**

## PLATON version of 16/02/2011; check.def file version of 16/02/2011

Datablock c\_users\_scheidt\_desktop\_work\_n0565\_0m - ellipsoid plot

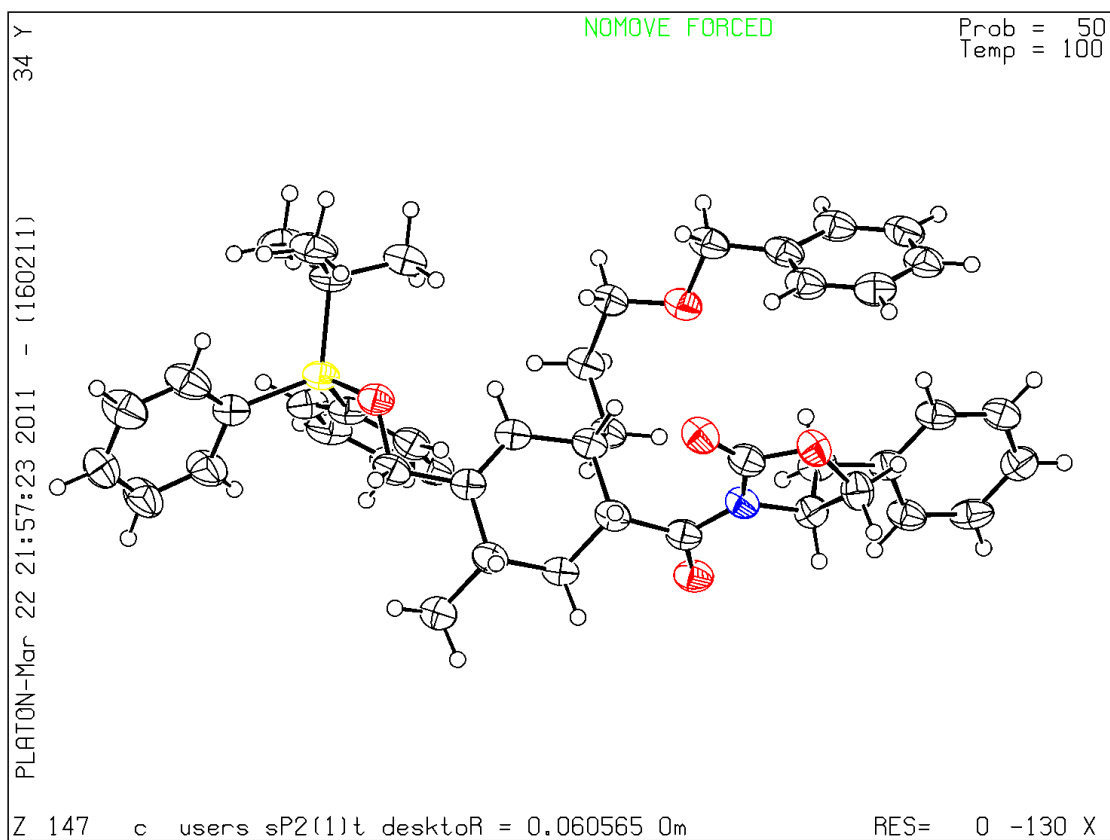

Supplement: NIHMS335627-supplement-2.pdf [file NIHMS335627-supplement-2.pdf]
